# Supplementary material for: A new database contains 520 studies investigating the carcinogenicity data of 238 pharmaceuticals across 14 ATC classifications
Source: Front Toxicol. 2024 Sep 17;6:1450612. doi: 10.3389/ftox.2024.1450612 (PMC11442431; doi:10.3389/ftox.2024.1450612)
Supplement: Supplementary file 2 [file Table1.xlsx]

## Sheet: Sheet1
Dossier filename (<substance UUID>_dossier.i6z)	Substance name	CAS number	IUPAC name	Release	Appl No filename	ATC - Anatomical Class	UUID (dossier)	UUID (parent)	ID (endpoint study record)	UUID (endpoint study record)	Document subtype	Endpoint (code)	Endpoint (text)	Type of information (code)	Type of information (text)	Reliability (code)	Reliability (text)	Reliability (other)	Esr_data	Species	Strain	Route of administration	Suration of treatment/exposure	Frequency of treatment	Doses	Description incidence and severity observed body weight	Description incidence and severity observed clinical chemistry	Description incidence and severity observed clinical signs	Description incidence and severity observed dermal irritation if dermal study	Description incidence and severity observed food consumption	Description incidence and severity observed food efficiency	Description incidence and severity observed gross pathology	Description incidence and severity observed haematology	Description incidence and severity observed histopathology	Description incidence and severity observed histopathology neoplastic	Description incidence and severity observed ophthalmology	Description incidence and severity observed organ weights	Description incidence and severity observed urinalysis	Description incidence and severity observed water consumption	Description incidence and severity observed other effects	Description incidence mortality	Details on results	Relevance of carcinogenic effects potential	Conclusions	Executive summary	UUID	Key result	Basis	Endpoint (code)
d567a1db-118f-49c6-acba-40fcf78a0d17_dossier.i6z	NDA208471-lixisenatide	320367-13-3	(4S)-5-[[2-[[(2S,3R)-1-[[(2S)-1-[[(2S,3R)-1-[[(2S)-1-[[(2S)-1-[[(2S)-1-[[(2S)-1-[[(2S)-6-amino-1-[[(2S)-5-amino-1-[[(2S)-1-[[(2S)-1-[[(2S)-1-[[(2S)-1-[[(2S)-1-[[(2S)-1-[[(2S)-1-[[(2S)-1-[[(2S)-1-[[(2S,3S)-1-[[(2S)-1-[[(2S)-1-[[(2S)-1-[[(2S)-6-amino-1-[[(2S)-4-amino-1-[[2-[[2-[(2S)-2-[[(2S)-1-[[(2S)-1-[[2-[[(2S)-1-[(2S)-2-[(2S)-2-[[(2S)-1-[[(2S)-6-amino-1-[[(2S)-6-amino-1-[[(2S)-6-amino-1-[[(2S)-6…	v2	NDA208471	ALIMENTARY TRACT AND METABOLISM	4104304f-2d53-4dc4-8ea5-99e489d0f966	d567a1db-118f-49c6-acba-40fcf78a0d17	46161388	9c1ae370-5942-4932-8ce8-4ad63191c69b	Carcinogenicity	61280	carcinogenicity, other	1895	experimental study				{"AdministrativeData": {"Endpoint": {"code": "61280"}, "StudyResultType": {"code": "1895"}, "RobustStudy": false, "UsedForClassification": false, "UsedForMSDS": false}, "MaterialsAndMethods": {"TestMaterials": {"TestMaterialInformation": "7a31021f-0f54-4115-b16b-e08f1478d5e9/4104304f-2d53-4dc4-8ea5-99e489d0f966", "SpecificDetailsOnTestMaterialUsedForTheStudy": "#PPL-AVE100501A (until 31 Oct 2007)…	rat	Sprague-Dawley	subcutaneous	2 years	twice daily	None other:ug/kg/day, 40.0 other:ug/kg/day, 200.0 other:ug/kg/day, 1000.0 other:ug/kg/day																	Key Study Findings • There were no treatment-related effects on mortality. There were no noteworthy differences in deaths due to tumors or non-tumor causes between control and treated animals. • Treatment-related clinical signs included an increased incidence in distended abdomens and increased salivation for all treated groups. • A dose-related decrease in body weight was observed throughout the…			Key Study Findings • There were no treatment-related effects on mortality. There were no noteworthy differences in deaths due to tumors or non-tumor causes between control and treated animals. • Treatment-related clinical signs included an increased incidence in distended abdomens and increased salivation for all treated groups. • A dose-related decrease in body weight was observed throughout the…	028f9252-8dbd-4dd8-9649-11a31dbb7f59	FALSE	{'code': '61025', 'code (mapped)': 'histopathology: non-neoplastic'}	345
d567a1db-118f-49c6-acba-40fcf78a0d17_dossier.i6z	NDA208471-lixisenatide	320367-13-3	(4S)-5-[[2-[[(2S,3R)-1-[[(2S)-1-[[(2S,3R)-1-[[(2S)-1-[[(2S)-1-[[(2S)-1-[[(2S)-1-[[(2S)-6-amino-1-[[(2S)-5-amino-1-[[(2S)-1-[[(2S)-1-[[(2S)-1-[[(2S)-1-[[(2S)-1-[[(2S)-1-[[(2S)-1-[[(2S)-1-[[(2S)-1-[[(2S,3S)-1-[[(2S)-1-[[(2S)-1-[[(2S)-1-[[(2S)-6-amino-1-[[(2S)-4-amino-1-[[2-[[2-[(2S)-2-[[(2S)-1-[[(2S)-1-[[2-[[(2S)-1-[(2S)-2-[(2S)-2-[[(2S)-1-[[(2S)-6-amino-1-[[(2S)-6-amino-1-[[(2S)-6-amino-1-[[(2S)-6…	v2	NDA208471	ALIMENTARY TRACT AND METABOLISM	4104304f-2d53-4dc4-8ea5-99e489d0f966	d567a1db-118f-49c6-acba-40fcf78a0d17	46161388	9c1ae370-5942-4932-8ce8-4ad63191c69b	Carcinogenicity	61280	carcinogenicity, other	1895	experimental study				{"AdministrativeData": {"Endpoint": {"code": "61280"}, "StudyResultType": {"code": "1895"}, "RobustStudy": false, "UsedForClassification": false, "UsedForMSDS": false}, "MaterialsAndMethods": {"TestMaterials": {"TestMaterialInformation": "7a31021f-0f54-4115-b16b-e08f1478d5e9/4104304f-2d53-4dc4-8ea5-99e489d0f966", "SpecificDetailsOnTestMaterialUsedForTheStudy": "#PPL-AVE100501A (until 31 Oct 2007)…	rat	Sprague-Dawley	subcutaneous	2 years	twice daily	None other:ug/kg/day, 40.0 other:ug/kg/day, 200.0 other:ug/kg/day, 1000.0 other:ug/kg/day																	Key Study Findings • There were no treatment-related effects on mortality. There were no noteworthy differences in deaths due to tumors or non-tumor causes between control and treated animals. • Treatment-related clinical signs included an increased incidence in distended abdomens and increased salivation for all treated groups. • A dose-related decrease in body weight was observed throughout the…			Key Study Findings • There were no treatment-related effects on mortality. There were no noteworthy differences in deaths due to tumors or non-tumor causes between control and treated animals. • Treatment-related clinical signs included an increased incidence in distended abdomens and increased salivation for all treated groups. • A dose-related decrease in body weight was observed throughout the…	028f9252-8dbd-4dd8-9649-11a31dbb7f59	FALSE	{'code': '61025', 'code (mapped)': 'histopathology: non-neoplastic'}	345
d567a1db-118f-49c6-acba-40fcf78a0d17_dossier.i6z	NDA208471-lixisenatide	320367-13-3	(4S)-5-[[2-[[(2S,3R)-1-[[(2S)-1-[[(2S,3R)-1-[[(2S)-1-[[(2S)-1-[[(2S)-1-[[(2S)-1-[[(2S)-6-amino-1-[[(2S)-5-amino-1-[[(2S)-1-[[(2S)-1-[[(2S)-1-[[(2S)-1-[[(2S)-1-[[(2S)-1-[[(2S)-1-[[(2S)-1-[[(2S)-1-[[(2S,3S)-1-[[(2S)-1-[[(2S)-1-[[(2S)-1-[[(2S)-6-amino-1-[[(2S)-4-amino-1-[[2-[[2-[(2S)-2-[[(2S)-1-[[(2S)-1-[[2-[[(2S)-1-[(2S)-2-[(2S)-2-[[(2S)-1-[[(2S)-6-amino-1-[[(2S)-6-amino-1-[[(2S)-6-amino-1-[[(2S)-6…	v2	NDA208471	ALIMENTARY TRACT AND METABOLISM	4104304f-2d53-4dc4-8ea5-99e489d0f966	d567a1db-118f-49c6-acba-40fcf78a0d17	46161388	9c1ae370-5942-4932-8ce8-4ad63191c69b	Carcinogenicity	61280	carcinogenicity, other	1895	experimental study				{"AdministrativeData": {"Endpoint": {"code": "61280"}, "StudyResultType": {"code": "1895"}, "RobustStudy": false, "UsedForClassification": false, "UsedForMSDS": false}, "MaterialsAndMethods": {"TestMaterials": {"TestMaterialInformation": "7a31021f-0f54-4115-b16b-e08f1478d5e9/4104304f-2d53-4dc4-8ea5-99e489d0f966", "SpecificDetailsOnTestMaterialUsedForTheStudy": "#PPL-AVE100501A (until 31 Oct 2007)…	rat	Sprague-Dawley	subcutaneous	2 years	twice daily	None other:ug/kg/day, 40.0 other:ug/kg/day, 200.0 other:ug/kg/day, 1000.0 other:ug/kg/day																	Key Study Findings • There were no treatment-related effects on mortality. There were no noteworthy differences in deaths due to tumors or non-tumor causes between control and treated animals. • Treatment-related clinical signs included an increased incidence in distended abdomens and increased salivation for all treated groups. • A dose-related decrease in body weight was observed throughout the…			Key Study Findings • There were no treatment-related effects on mortality. There were no noteworthy differences in deaths due to tumors or non-tumor causes between control and treated animals. • Treatment-related clinical signs included an increased incidence in distended abdomens and increased salivation for all treated groups. • A dose-related decrease in body weight was observed throughout the…	0e0891ff-6aff-4898-bbe2-50fe6161a188	FALSE	{'code': '61025', 'code (mapped)': 'histopathology: non-neoplastic'}	345
d567a1db-118f-49c6-acba-40fcf78a0d17_dossier.i6z	NDA208471-lixisenatide	320367-13-3	(4S)-5-[[2-[[(2S,3R)-1-[[(2S)-1-[[(2S,3R)-1-[[(2S)-1-[[(2S)-1-[[(2S)-1-[[(2S)-1-[[(2S)-6-amino-1-[[(2S)-5-amino-1-[[(2S)-1-[[(2S)-1-[[(2S)-1-[[(2S)-1-[[(2S)-1-[[(2S)-1-[[(2S)-1-[[(2S)-1-[[(2S)-1-[[(2S,3S)-1-[[(2S)-1-[[(2S)-1-[[(2S)-1-[[(2S)-6-amino-1-[[(2S)-4-amino-1-[[2-[[2-[(2S)-2-[[(2S)-1-[[(2S)-1-[[2-[[(2S)-1-[(2S)-2-[(2S)-2-[[(2S)-1-[[(2S)-6-amino-1-[[(2S)-6-amino-1-[[(2S)-6-amino-1-[[(2S)-6…	v2	NDA208471	ALIMENTARY TRACT AND METABOLISM	4104304f-2d53-4dc4-8ea5-99e489d0f966	d567a1db-118f-49c6-acba-40fcf78a0d17	46161388	9c1ae370-5942-4932-8ce8-4ad63191c69b	Carcinogenicity	61280	carcinogenicity, other	1895	experimental study				{"AdministrativeData": {"Endpoint": {"code": "61280"}, "StudyResultType": {"code": "1895"}, "RobustStudy": false, "UsedForClassification": false, "UsedForMSDS": false}, "MaterialsAndMethods": {"TestMaterials": {"TestMaterialInformation": "7a31021f-0f54-4115-b16b-e08f1478d5e9/4104304f-2d53-4dc4-8ea5-99e489d0f966", "SpecificDetailsOnTestMaterialUsedForTheStudy": "#PPL-AVE100501A (until 31 Oct 2007)…	rat	Sprague-Dawley	subcutaneous	2 years	twice daily	None other:ug/kg/day, 40.0 other:ug/kg/day, 200.0 other:ug/kg/day, 1000.0 other:ug/kg/day																	Key Study Findings • There were no treatment-related effects on mortality. There were no noteworthy differences in deaths due to tumors or non-tumor causes between control and treated animals. • Treatment-related clinical signs included an increased incidence in distended abdomens and increased salivation for all treated groups. • A dose-related decrease in body weight was observed throughout the…			Key Study Findings • There were no treatment-related effects on mortality. There were no noteworthy differences in deaths due to tumors or non-tumor causes between control and treated animals. • Treatment-related clinical signs included an increased incidence in distended abdomens and increased salivation for all treated groups. • A dose-related decrease in body weight was observed throughout the…	22d3a7f7-2ff3-4454-ab74-767beda11e7f	FALSE	{'code': '61011', 'code (mapped)': 'clinical signs'}	345
d567a1db-118f-49c6-acba-40fcf78a0d17_dossier.i6z	NDA208471-lixisenatide	320367-13-3	(4S)-5-[[2-[[(2S,3R)-1-[[(2S)-1-[[(2S,3R)-1-[[(2S)-1-[[(2S)-1-[[(2S)-1-[[(2S)-1-[[(2S)-6-amino-1-[[(2S)-5-amino-1-[[(2S)-1-[[(2S)-1-[[(2S)-1-[[(2S)-1-[[(2S)-1-[[(2S)-1-[[(2S)-1-[[(2S)-1-[[(2S)-1-[[(2S,3S)-1-[[(2S)-1-[[(2S)-1-[[(2S)-1-[[(2S)-6-amino-1-[[(2S)-4-amino-1-[[2-[[2-[(2S)-2-[[(2S)-1-[[(2S)-1-[[2-[[(2S)-1-[(2S)-2-[(2S)-2-[[(2S)-1-[[(2S)-6-amino-1-[[(2S)-6-amino-1-[[(2S)-6-amino-1-[[(2S)-6…	v2	NDA208471	ALIMENTARY TRACT AND METABOLISM	4104304f-2d53-4dc4-8ea5-99e489d0f966	d567a1db-118f-49c6-acba-40fcf78a0d17	46161388	9c1ae370-5942-4932-8ce8-4ad63191c69b	Carcinogenicity	61280	carcinogenicity, other	1895	experimental study				{"AdministrativeData": {"Endpoint": {"code": "61280"}, "StudyResultType": {"code": "1895"}, "RobustStudy": false, "UsedForClassification": false, "UsedForMSDS": false}, "MaterialsAndMethods": {"TestMaterials": {"TestMaterialInformation": "7a31021f-0f54-4115-b16b-e08f1478d5e9/4104304f-2d53-4dc4-8ea5-99e489d0f966", "SpecificDetailsOnTestMaterialUsedForTheStudy": "#PPL-AVE100501A (until 31 Oct 2007)…	rat	Sprague-Dawley	subcutaneous	2 years	twice daily	None other:ug/kg/day, 40.0 other:ug/kg/day, 200.0 other:ug/kg/day, 1000.0 other:ug/kg/day																	Key Study Findings • There were no treatment-related effects on mortality. There were no noteworthy differences in deaths due to tumors or non-tumor causes between control and treated animals. • Treatment-related clinical signs included an increased incidence in distended abdomens and increased salivation for all treated groups. • A dose-related decrease in body weight was observed throughout the…			Key Study Findings • There were no treatment-related effects on mortality. There were no noteworthy differences in deaths due to tumors or non-tumor causes between control and treated animals. • Treatment-related clinical signs included an increased incidence in distended abdomens and increased salivation for all treated groups. • A dose-related decrease in body weight was observed throughout the…	296514f3-0524-4622-a389-5904618e92be	FALSE	{'code': '61026', 'code (mapped)': 'histopathology: neoplastic'}	345
d567a1db-118f-49c6-acba-40fcf78a0d17_dossier.i6z	NDA208471-lixisenatide	320367-13-3	(4S)-5-[[2-[[(2S,3R)-1-[[(2S)-1-[[(2S,3R)-1-[[(2S)-1-[[(2S)-1-[[(2S)-1-[[(2S)-1-[[(2S)-6-amino-1-[[(2S)-5-amino-1-[[(2S)-1-[[(2S)-1-[[(2S)-1-[[(2S)-1-[[(2S)-1-[[(2S)-1-[[(2S)-1-[[(2S)-1-[[(2S)-1-[[(2S,3S)-1-[[(2S)-1-[[(2S)-1-[[(2S)-1-[[(2S)-6-amino-1-[[(2S)-4-amino-1-[[2-[[2-[(2S)-2-[[(2S)-1-[[(2S)-1-[[2-[[(2S)-1-[(2S)-2-[(2S)-2-[[(2S)-1-[[(2S)-6-amino-1-[[(2S)-6-amino-1-[[(2S)-6-amino-1-[[(2S)-6…	v2	NDA208471	ALIMENTARY TRACT AND METABOLISM	4104304f-2d53-4dc4-8ea5-99e489d0f966	d567a1db-118f-49c6-acba-40fcf78a0d17	46161388	9c1ae370-5942-4932-8ce8-4ad63191c69b	Carcinogenicity	61280	carcinogenicity, other	1895	experimental study				{"AdministrativeData": {"Endpoint": {"code": "61280"}, "StudyResultType": {"code": "1895"}, "RobustStudy": false, "UsedForClassification": false, "UsedForMSDS": false}, "MaterialsAndMethods": {"TestMaterials": {"TestMaterialInformation": "7a31021f-0f54-4115-b16b-e08f1478d5e9/4104304f-2d53-4dc4-8ea5-99e489d0f966", "SpecificDetailsOnTestMaterialUsedForTheStudy": "#PPL-AVE100501A (until 31 Oct 2007)…	rat	Sprague-Dawley	subcutaneous	2 years	twice daily	None other:ug/kg/day, 40.0 other:ug/kg/day, 200.0 other:ug/kg/day, 1000.0 other:ug/kg/day																	Key Study Findings • There were no treatment-related effects on mortality. There were no noteworthy differences in deaths due to tumors or non-tumor causes between control and treated animals. • Treatment-related clinical signs included an increased incidence in distended abdomens and increased salivation for all treated groups. • A dose-related decrease in body weight was observed throughout the…			Key Study Findings • There were no treatment-related effects on mortality. There were no noteworthy differences in deaths due to tumors or non-tumor causes between control and treated animals. • Treatment-related clinical signs included an increased incidence in distended abdomens and increased salivation for all treated groups. • A dose-related decrease in body weight was observed throughout the…	3b622fba-3e2e-49c0-a4b4-44364ed9c45a	FALSE	{'code': '61011', 'code (mapped)': 'clinical signs'}	345
d567a1db-118f-49c6-acba-40fcf78a0d17_dossier.i6z	NDA208471-lixisenatide	320367-13-3	(4S)-5-[[2-[[(2S,3R)-1-[[(2S)-1-[[(2S,3R)-1-[[(2S)-1-[[(2S)-1-[[(2S)-1-[[(2S)-1-[[(2S)-6-amino-1-[[(2S)-5-amino-1-[[(2S)-1-[[(2S)-1-[[(2S)-1-[[(2S)-1-[[(2S)-1-[[(2S)-1-[[(2S)-1-[[(2S)-1-[[(2S)-1-[[(2S,3S)-1-[[(2S)-1-[[(2S)-1-[[(2S)-1-[[(2S)-6-amino-1-[[(2S)-4-amino-1-[[2-[[2-[(2S)-2-[[(2S)-1-[[(2S)-1-[[2-[[(2S)-1-[(2S)-2-[(2S)-2-[[(2S)-1-[[(2S)-6-amino-1-[[(2S)-6-amino-1-[[(2S)-6-amino-1-[[(2S)-6…	v2	NDA208471	ALIMENTARY TRACT AND METABOLISM	4104304f-2d53-4dc4-8ea5-99e489d0f966	d567a1db-118f-49c6-acba-40fcf78a0d17	46161388	9c1ae370-5942-4932-8ce8-4ad63191c69b	Carcinogenicity	61280	carcinogenicity, other	1895	experimental study				{"AdministrativeData": {"Endpoint": {"code": "61280"}, "StudyResultType": {"code": "1895"}, "RobustStudy": false, "UsedForClassification": false, "UsedForMSDS": false}, "MaterialsAndMethods": {"TestMaterials": {"TestMaterialInformation": "7a31021f-0f54-4115-b16b-e08f1478d5e9/4104304f-2d53-4dc4-8ea5-99e489d0f966", "SpecificDetailsOnTestMaterialUsedForTheStudy": "#PPL-AVE100501A (until 31 Oct 2007)…	rat	Sprague-Dawley	subcutaneous	2 years	twice daily	None other:ug/kg/day, 40.0 other:ug/kg/day, 200.0 other:ug/kg/day, 1000.0 other:ug/kg/day																	Key Study Findings • There were no treatment-related effects on mortality. There were no noteworthy differences in deaths due to tumors or non-tumor causes between control and treated animals. • Treatment-related clinical signs included an increased incidence in distended abdomens and increased salivation for all treated groups. • A dose-related decrease in body weight was observed throughout the…			Key Study Findings • There were no treatment-related effects on mortality. There were no noteworthy differences in deaths due to tumors or non-tumor causes between control and treated animals. • Treatment-related clinical signs included an increased incidence in distended abdomens and increased salivation for all treated groups. • A dose-related decrease in body weight was observed throughout the…	3b622fba-3e2e-49c0-a4b4-44364ed9c45a	FALSE	{'code': '61011', 'code (mapped)': 'clinical signs'}	345
d567a1db-118f-49c6-acba-40fcf78a0d17_dossier.i6z	NDA208471-lixisenatide	320367-13-3	(4S)-5-[[2-[[(2S,3R)-1-[[(2S)-1-[[(2S,3R)-1-[[(2S)-1-[[(2S)-1-[[(2S)-1-[[(2S)-1-[[(2S)-6-amino-1-[[(2S)-5-amino-1-[[(2S)-1-[[(2S)-1-[[(2S)-1-[[(2S)-1-[[(2S)-1-[[(2S)-1-[[(2S)-1-[[(2S)-1-[[(2S)-1-[[(2S,3S)-1-[[(2S)-1-[[(2S)-1-[[(2S)-1-[[(2S)-6-amino-1-[[(2S)-4-amino-1-[[2-[[2-[(2S)-2-[[(2S)-1-[[(2S)-1-[[2-[[(2S)-1-[(2S)-2-[(2S)-2-[[(2S)-1-[[(2S)-6-amino-1-[[(2S)-6-amino-1-[[(2S)-6-amino-1-[[(2S)-6…	v2	NDA208471	ALIMENTARY TRACT AND METABOLISM	4104304f-2d53-4dc4-8ea5-99e489d0f966	d567a1db-118f-49c6-acba-40fcf78a0d17	46161388	9c1ae370-5942-4932-8ce8-4ad63191c69b	Carcinogenicity	61280	carcinogenicity, other	1895	experimental study				{"AdministrativeData": {"Endpoint": {"code": "61280"}, "StudyResultType": {"code": "1895"}, "RobustStudy": false, "UsedForClassification": false, "UsedForMSDS": false}, "MaterialsAndMethods": {"TestMaterials": {"TestMaterialInformation": "7a31021f-0f54-4115-b16b-e08f1478d5e9/4104304f-2d53-4dc4-8ea5-99e489d0f966", "SpecificDetailsOnTestMaterialUsedForTheStudy": "#PPL-AVE100501A (until 31 Oct 2007)…	rat	Sprague-Dawley	subcutaneous	2 years	twice daily	None other:ug/kg/day, 40.0 other:ug/kg/day, 200.0 other:ug/kg/day, 1000.0 other:ug/kg/day																	Key Study Findings • There were no treatment-related effects on mortality. There were no noteworthy differences in deaths due to tumors or non-tumor causes between control and treated animals. • Treatment-related clinical signs included an increased incidence in distended abdomens and increased salivation for all treated groups. • A dose-related decrease in body weight was observed throughout the…			Key Study Findings • There were no treatment-related effects on mortality. There were no noteworthy differences in deaths due to tumors or non-tumor causes between control and treated animals. • Treatment-related clinical signs included an increased incidence in distended abdomens and increased salivation for all treated groups. • A dose-related decrease in body weight was observed throughout the…	3d34fd00-766e-4b63-980d-669b518daca0	FALSE		1109
d567a1db-118f-49c6-acba-40fcf78a0d17_dossier.i6z	NDA208471-lixisenatide	320367-13-3	(4S)-5-[[2-[[(2S,3R)-1-[[(2S)-1-[[(2S,3R)-1-[[(2S)-1-[[(2S)-1-[[(2S)-1-[[(2S)-1-[[(2S)-6-amino-1-[[(2S)-5-amino-1-[[(2S)-1-[[(2S)-1-[[(2S)-1-[[(2S)-1-[[(2S)-1-[[(2S)-1-[[(2S)-1-[[(2S)-1-[[(2S)-1-[[(2S,3S)-1-[[(2S)-1-[[(2S)-1-[[(2S)-1-[[(2S)-6-amino-1-[[(2S)-4-amino-1-[[2-[[2-[(2S)-2-[[(2S)-1-[[(2S)-1-[[2-[[(2S)-1-[(2S)-2-[(2S)-2-[[(2S)-1-[[(2S)-6-amino-1-[[(2S)-6-amino-1-[[(2S)-6-amino-1-[[(2S)-6…	v2	NDA208471	ALIMENTARY TRACT AND METABOLISM	4104304f-2d53-4dc4-8ea5-99e489d0f966	d567a1db-118f-49c6-acba-40fcf78a0d17	46161388	9c1ae370-5942-4932-8ce8-4ad63191c69b	Carcinogenicity	61280	carcinogenicity, other	1895	experimental study				{"AdministrativeData": {"Endpoint": {"code": "61280"}, "StudyResultType": {"code": "1895"}, "RobustStudy": false, "UsedForClassification": false, "UsedForMSDS": false}, "MaterialsAndMethods": {"TestMaterials": {"TestMaterialInformation": "7a31021f-0f54-4115-b16b-e08f1478d5e9/4104304f-2d53-4dc4-8ea5-99e489d0f966", "SpecificDetailsOnTestMaterialUsedForTheStudy": "#PPL-AVE100501A (until 31 Oct 2007)…	rat	Sprague-Dawley	subcutaneous	2 years	twice daily	None other:ug/kg/day, 40.0 other:ug/kg/day, 200.0 other:ug/kg/day, 1000.0 other:ug/kg/day																	Key Study Findings • There were no treatment-related effects on mortality. There were no noteworthy differences in deaths due to tumors or non-tumor causes between control and treated animals. • Treatment-related clinical signs included an increased incidence in distended abdomens and increased salivation for all treated groups. • A dose-related decrease in body weight was observed throughout the…			Key Study Findings • There were no treatment-related effects on mortality. There were no noteworthy differences in deaths due to tumors or non-tumor causes between control and treated animals. • Treatment-related clinical signs included an increased incidence in distended abdomens and increased salivation for all treated groups. • A dose-related decrease in body weight was observed throughout the…	3f737595-d644-4813-80d8-edc48f7caccb	FALSE	{'code': '61013', 'code (mapped)': 'food consumption and compound intake'}	345
d567a1db-118f-49c6-acba-40fcf78a0d17_dossier.i6z	NDA208471-lixisenatide	320367-13-3	(4S)-5-[[2-[[(2S,3R)-1-[[(2S)-1-[[(2S,3R)-1-[[(2S)-1-[[(2S)-1-[[(2S)-1-[[(2S)-1-[[(2S)-6-amino-1-[[(2S)-5-amino-1-[[(2S)-1-[[(2S)-1-[[(2S)-1-[[(2S)-1-[[(2S)-1-[[(2S)-1-[[(2S)-1-[[(2S)-1-[[(2S)-1-[[(2S,3S)-1-[[(2S)-1-[[(2S)-1-[[(2S)-1-[[(2S)-6-amino-1-[[(2S)-4-amino-1-[[2-[[2-[(2S)-2-[[(2S)-1-[[(2S)-1-[[2-[[(2S)-1-[(2S)-2-[(2S)-2-[[(2S)-1-[[(2S)-6-amino-1-[[(2S)-6-amino-1-[[(2S)-6-amino-1-[[(2S)-6…	v2	NDA208471	ALIMENTARY TRACT AND METABOLISM	4104304f-2d53-4dc4-8ea5-99e489d0f966	d567a1db-118f-49c6-acba-40fcf78a0d17	46161388	9c1ae370-5942-4932-8ce8-4ad63191c69b	Carcinogenicity	61280	carcinogenicity, other	1895	experimental study				{"AdministrativeData": {"Endpoint": {"code": "61280"}, "StudyResultType": {"code": "1895"}, "RobustStudy": false, "UsedForClassification": false, "UsedForMSDS": false}, "MaterialsAndMethods": {"TestMaterials": {"TestMaterialInformation": "7a31021f-0f54-4115-b16b-e08f1478d5e9/4104304f-2d53-4dc4-8ea5-99e489d0f966", "SpecificDetailsOnTestMaterialUsedForTheStudy": "#PPL-AVE100501A (until 31 Oct 2007)…	rat	Sprague-Dawley	subcutaneous	2 years	twice daily	None other:ug/kg/day, 40.0 other:ug/kg/day, 200.0 other:ug/kg/day, 1000.0 other:ug/kg/day																	Key Study Findings • There were no treatment-related effects on mortality. There were no noteworthy differences in deaths due to tumors or non-tumor causes between control and treated animals. • Treatment-related clinical signs included an increased incidence in distended abdomens and increased salivation for all treated groups. • A dose-related decrease in body weight was observed throughout the…			Key Study Findings • There were no treatment-related effects on mortality. There were no noteworthy differences in deaths due to tumors or non-tumor causes between control and treated animals. • Treatment-related clinical signs included an increased incidence in distended abdomens and increased salivation for all treated groups. • A dose-related decrease in body weight was observed throughout the…	3fadf7e7-a412-4b1e-ab6c-a4b291648210	FALSE	{'code': '61025', 'code (mapped)': 'histopathology: non-neoplastic'}	345
d567a1db-118f-49c6-acba-40fcf78a0d17_dossier.i6z	NDA208471-lixisenatide	320367-13-3	(4S)-5-[[2-[[(2S,3R)-1-[[(2S)-1-[[(2S,3R)-1-[[(2S)-1-[[(2S)-1-[[(2S)-1-[[(2S)-1-[[(2S)-6-amino-1-[[(2S)-5-amino-1-[[(2S)-1-[[(2S)-1-[[(2S)-1-[[(2S)-1-[[(2S)-1-[[(2S)-1-[[(2S)-1-[[(2S)-1-[[(2S)-1-[[(2S,3S)-1-[[(2S)-1-[[(2S)-1-[[(2S)-1-[[(2S)-6-amino-1-[[(2S)-4-amino-1-[[2-[[2-[(2S)-2-[[(2S)-1-[[(2S)-1-[[2-[[(2S)-1-[(2S)-2-[(2S)-2-[[(2S)-1-[[(2S)-6-amino-1-[[(2S)-6-amino-1-[[(2S)-6-amino-1-[[(2S)-6…	v2	NDA208471	ALIMENTARY TRACT AND METABOLISM	4104304f-2d53-4dc4-8ea5-99e489d0f966	d567a1db-118f-49c6-acba-40fcf78a0d17	46161388	9c1ae370-5942-4932-8ce8-4ad63191c69b	Carcinogenicity	61280	carcinogenicity, other	1895	experimental study				{"AdministrativeData": {"Endpoint": {"code": "61280"}, "StudyResultType": {"code": "1895"}, "RobustStudy": false, "UsedForClassification": false, "UsedForMSDS": false}, "MaterialsAndMethods": {"TestMaterials": {"TestMaterialInformation": "7a31021f-0f54-4115-b16b-e08f1478d5e9/4104304f-2d53-4dc4-8ea5-99e489d0f966", "SpecificDetailsOnTestMaterialUsedForTheStudy": "#PPL-AVE100501A (until 31 Oct 2007)…	rat	Sprague-Dawley	subcutaneous	2 years	twice daily	None other:ug/kg/day, 40.0 other:ug/kg/day, 200.0 other:ug/kg/day, 1000.0 other:ug/kg/day																	Key Study Findings • There were no treatment-related effects on mortality. There were no noteworthy differences in deaths due to tumors or non-tumor causes between control and treated animals. • Treatment-related clinical signs included an increased incidence in distended abdomens and increased salivation for all treated groups. • A dose-related decrease in body weight was observed throughout the…			Key Study Findings • There were no treatment-related effects on mortality. There were no noteworthy differences in deaths due to tumors or non-tumor causes between control and treated animals. • Treatment-related clinical signs included an increased incidence in distended abdomens and increased salivation for all treated groups. • A dose-related decrease in body weight was observed throughout the…	4bc541e9-73dc-4b68-92de-1f282f0de6bf	FALSE	{'code': '61025', 'code (mapped)': 'histopathology: non-neoplastic'}	345
d567a1db-118f-49c6-acba-40fcf78a0d17_dossier.i6z	NDA208471-lixisenatide	320367-13-3	(4S)-5-[[2-[[(2S,3R)-1-[[(2S)-1-[[(2S,3R)-1-[[(2S)-1-[[(2S)-1-[[(2S)-1-[[(2S)-1-[[(2S)-6-amino-1-[[(2S)-5-amino-1-[[(2S)-1-[[(2S)-1-[[(2S)-1-[[(2S)-1-[[(2S)-1-[[(2S)-1-[[(2S)-1-[[(2S)-1-[[(2S)-1-[[(2S,3S)-1-[[(2S)-1-[[(2S)-1-[[(2S)-1-[[(2S)-6-amino-1-[[(2S)-4-amino-1-[[2-[[2-[(2S)-2-[[(2S)-1-[[(2S)-1-[[2-[[(2S)-1-[(2S)-2-[(2S)-2-[[(2S)-1-[[(2S)-6-amino-1-[[(2S)-6-amino-1-[[(2S)-6-amino-1-[[(2S)-6…	v2	NDA208471	ALIMENTARY TRACT AND METABOLISM	4104304f-2d53-4dc4-8ea5-99e489d0f966	d567a1db-118f-49c6-acba-40fcf78a0d17	46161388	9c1ae370-5942-4932-8ce8-4ad63191c69b	Carcinogenicity	61280	carcinogenicity, other	1895	experimental study				{"AdministrativeData": {"Endpoint": {"code": "61280"}, "StudyResultType": {"code": "1895"}, "RobustStudy": false, "UsedForClassification": false, "UsedForMSDS": false}, "MaterialsAndMethods": {"TestMaterials": {"TestMaterialInformation": "7a31021f-0f54-4115-b16b-e08f1478d5e9/4104304f-2d53-4dc4-8ea5-99e489d0f966", "SpecificDetailsOnTestMaterialUsedForTheStudy": "#PPL-AVE100501A (until 31 Oct 2007)…	rat	Sprague-Dawley	subcutaneous	2 years	twice daily	None other:ug/kg/day, 40.0 other:ug/kg/day, 200.0 other:ug/kg/day, 1000.0 other:ug/kg/day																	Key Study Findings • There were no treatment-related effects on mortality. There were no noteworthy differences in deaths due to tumors or non-tumor causes between control and treated animals. • Treatment-related clinical signs included an increased incidence in distended abdomens and increased salivation for all treated groups. • A dose-related decrease in body weight was observed throughout the…			Key Study Findings • There were no treatment-related effects on mortality. There were no noteworthy differences in deaths due to tumors or non-tumor causes between control and treated animals. • Treatment-related clinical signs included an increased incidence in distended abdomens and increased salivation for all treated groups. • A dose-related decrease in body weight was observed throughout the…	5c1f49d0-c58d-4126-bb51-a32fa8f0138c	FALSE	{'code': '61025', 'code (mapped)': 'histopathology: non-neoplastic'}	345
d567a1db-118f-49c6-acba-40fcf78a0d17_dossier.i6z	NDA208471-lixisenatide	320367-13-3	(4S)-5-[[2-[[(2S,3R)-1-[[(2S)-1-[[(2S,3R)-1-[[(2S)-1-[[(2S)-1-[[(2S)-1-[[(2S)-1-[[(2S)-6-amino-1-[[(2S)-5-amino-1-[[(2S)-1-[[(2S)-1-[[(2S)-1-[[(2S)-1-[[(2S)-1-[[(2S)-1-[[(2S)-1-[[(2S)-1-[[(2S)-1-[[(2S,3S)-1-[[(2S)-1-[[(2S)-1-[[(2S)-1-[[(2S)-6-amino-1-[[(2S)-4-amino-1-[[2-[[2-[(2S)-2-[[(2S)-1-[[(2S)-1-[[2-[[(2S)-1-[(2S)-2-[(2S)-2-[[(2S)-1-[[(2S)-6-amino-1-[[(2S)-6-amino-1-[[(2S)-6-amino-1-[[(2S)-6…	v2	NDA208471	ALIMENTARY TRACT AND METABOLISM	4104304f-2d53-4dc4-8ea5-99e489d0f966	d567a1db-118f-49c6-acba-40fcf78a0d17	46161388	9c1ae370-5942-4932-8ce8-4ad63191c69b	Carcinogenicity	61280	carcinogenicity, other	1895	experimental study				{"AdministrativeData": {"Endpoint": {"code": "61280"}, "StudyResultType": {"code": "1895"}, "RobustStudy": false, "UsedForClassification": false, "UsedForMSDS": false}, "MaterialsAndMethods": {"TestMaterials": {"TestMaterialInformation": "7a31021f-0f54-4115-b16b-e08f1478d5e9/4104304f-2d53-4dc4-8ea5-99e489d0f966", "SpecificDetailsOnTestMaterialUsedForTheStudy": "#PPL-AVE100501A (until 31 Oct 2007)…	rat	Sprague-Dawley	subcutaneous	2 years	twice daily	None other:ug/kg/day, 40.0 other:ug/kg/day, 200.0 other:ug/kg/day, 1000.0 other:ug/kg/day																	Key Study Findings • There were no treatment-related effects on mortality. There were no noteworthy differences in deaths due to tumors or non-tumor causes between control and treated animals. • Treatment-related clinical signs included an increased incidence in distended abdomens and increased salivation for all treated groups. • A dose-related decrease in body weight was observed throughout the…			Key Study Findings • There were no treatment-related effects on mortality. There were no noteworthy differences in deaths due to tumors or non-tumor causes between control and treated animals. • Treatment-related clinical signs included an increased incidence in distended abdomens and increased salivation for all treated groups. • A dose-related decrease in body weight was observed throughout the…	5f9d98ea-cc77-4425-9e05-b6eb2a883c4e	FALSE	{'code': '61026', 'code (mapped)': 'histopathology: neoplastic'}	345
d567a1db-118f-49c6-acba-40fcf78a0d17_dossier.i6z	NDA208471-lixisenatide	320367-13-3	(4S)-5-[[2-[[(2S,3R)-1-[[(2S)-1-[[(2S,3R)-1-[[(2S)-1-[[(2S)-1-[[(2S)-1-[[(2S)-1-[[(2S)-6-amino-1-[[(2S)-5-amino-1-[[(2S)-1-[[(2S)-1-[[(2S)-1-[[(2S)-1-[[(2S)-1-[[(2S)-1-[[(2S)-1-[[(2S)-1-[[(2S)-1-[[(2S,3S)-1-[[(2S)-1-[[(2S)-1-[[(2S)-1-[[(2S)-6-amino-1-[[(2S)-4-amino-1-[[2-[[2-[(2S)-2-[[(2S)-1-[[(2S)-1-[[2-[[(2S)-1-[(2S)-2-[(2S)-2-[[(2S)-1-[[(2S)-6-amino-1-[[(2S)-6-amino-1-[[(2S)-6-amino-1-[[(2S)-6…	v2	NDA208471	ALIMENTARY TRACT AND METABOLISM	4104304f-2d53-4dc4-8ea5-99e489d0f966	d567a1db-118f-49c6-acba-40fcf78a0d17	46161388	9c1ae370-5942-4932-8ce8-4ad63191c69b	Carcinogenicity	61280	carcinogenicity, other	1895	experimental study				{"AdministrativeData": {"Endpoint": {"code": "61280"}, "StudyResultType": {"code": "1895"}, "RobustStudy": false, "UsedForClassification": false, "UsedForMSDS": false}, "MaterialsAndMethods": {"TestMaterials": {"TestMaterialInformation": "7a31021f-0f54-4115-b16b-e08f1478d5e9/4104304f-2d53-4dc4-8ea5-99e489d0f966", "SpecificDetailsOnTestMaterialUsedForTheStudy": "#PPL-AVE100501A (until 31 Oct 2007)…	rat	Sprague-Dawley	subcutaneous	2 years	twice daily	None other:ug/kg/day, 40.0 other:ug/kg/day, 200.0 other:ug/kg/day, 1000.0 other:ug/kg/day																	Key Study Findings • There were no treatment-related effects on mortality. There were no noteworthy differences in deaths due to tumors or non-tumor causes between control and treated animals. • Treatment-related clinical signs included an increased incidence in distended abdomens and increased salivation for all treated groups. • A dose-related decrease in body weight was observed throughout the…			Key Study Findings • There were no treatment-related effects on mortality. There were no noteworthy differences in deaths due to tumors or non-tumor causes between control and treated animals. • Treatment-related clinical signs included an increased incidence in distended abdomens and increased salivation for all treated groups. • A dose-related decrease in body weight was observed throughout the…	765b36a1-e64b-4f24-b3f2-17d5aa11c767	FALSE	{'code': '61023', 'code (mapped)': 'gross pathology'}	345
d567a1db-118f-49c6-acba-40fcf78a0d17_dossier.i6z	NDA208471-lixisenatide	320367-13-3	(4S)-5-[[2-[[(2S,3R)-1-[[(2S)-1-[[(2S,3R)-1-[[(2S)-1-[[(2S)-1-[[(2S)-1-[[(2S)-1-[[(2S)-6-amino-1-[[(2S)-5-amino-1-[[(2S)-1-[[(2S)-1-[[(2S)-1-[[(2S)-1-[[(2S)-1-[[(2S)-1-[[(2S)-1-[[(2S)-1-[[(2S)-1-[[(2S,3S)-1-[[(2S)-1-[[(2S)-1-[[(2S)-1-[[(2S)-6-amino-1-[[(2S)-4-amino-1-[[2-[[2-[(2S)-2-[[(2S)-1-[[(2S)-1-[[2-[[(2S)-1-[(2S)-2-[(2S)-2-[[(2S)-1-[[(2S)-6-amino-1-[[(2S)-6-amino-1-[[(2S)-6-amino-1-[[(2S)-6…	v2	NDA208471	ALIMENTARY TRACT AND METABOLISM	4104304f-2d53-4dc4-8ea5-99e489d0f966	d567a1db-118f-49c6-acba-40fcf78a0d17	46161388	9c1ae370-5942-4932-8ce8-4ad63191c69b	Carcinogenicity	61280	carcinogenicity, other	1895	experimental study				{"AdministrativeData": {"Endpoint": {"code": "61280"}, "StudyResultType": {"code": "1895"}, "RobustStudy": false, "UsedForClassification": false, "UsedForMSDS": false}, "MaterialsAndMethods": {"TestMaterials": {"TestMaterialInformation": "7a31021f-0f54-4115-b16b-e08f1478d5e9/4104304f-2d53-4dc4-8ea5-99e489d0f966", "SpecificDetailsOnTestMaterialUsedForTheStudy": "#PPL-AVE100501A (until 31 Oct 2007)…	rat	Sprague-Dawley	subcutaneous	2 years	twice daily	None other:ug/kg/day, 40.0 other:ug/kg/day, 200.0 other:ug/kg/day, 1000.0 other:ug/kg/day																	Key Study Findings • There were no treatment-related effects on mortality. There were no noteworthy differences in deaths due to tumors or non-tumor causes between control and treated animals. • Treatment-related clinical signs included an increased incidence in distended abdomens and increased salivation for all treated groups. • A dose-related decrease in body weight was observed throughout the…			Key Study Findings • There were no treatment-related effects on mortality. There were no noteworthy differences in deaths due to tumors or non-tumor causes between control and treated animals. • Treatment-related clinical signs included an increased incidence in distended abdomens and increased salivation for all treated groups. • A dose-related decrease in body weight was observed throughout the…	7e3e22fa-0cc8-4b63-a8db-7533342d3cbb	FALSE	{'code': '61025', 'code (mapped)': 'histopathology: non-neoplastic'}	345
d567a1db-118f-49c6-acba-40fcf78a0d17_dossier.i6z	NDA208471-lixisenatide	320367-13-3	(4S)-5-[[2-[[(2S,3R)-1-[[(2S)-1-[[(2S,3R)-1-[[(2S)-1-[[(2S)-1-[[(2S)-1-[[(2S)-1-[[(2S)-6-amino-1-[[(2S)-5-amino-1-[[(2S)-1-[[(2S)-1-[[(2S)-1-[[(2S)-1-[[(2S)-1-[[(2S)-1-[[(2S)-1-[[(2S)-1-[[(2S)-1-[[(2S,3S)-1-[[(2S)-1-[[(2S)-1-[[(2S)-1-[[(2S)-6-amino-1-[[(2S)-4-amino-1-[[2-[[2-[(2S)-2-[[(2S)-1-[[(2S)-1-[[2-[[(2S)-1-[(2S)-2-[(2S)-2-[[(2S)-1-[[(2S)-6-amino-1-[[(2S)-6-amino-1-[[(2S)-6-amino-1-[[(2S)-6…	v2	NDA208471	ALIMENTARY TRACT AND METABOLISM	4104304f-2d53-4dc4-8ea5-99e489d0f966	d567a1db-118f-49c6-acba-40fcf78a0d17	46161388	9c1ae370-5942-4932-8ce8-4ad63191c69b	Carcinogenicity	61280	carcinogenicity, other	1895	experimental study				{"AdministrativeData": {"Endpoint": {"code": "61280"}, "StudyResultType": {"code": "1895"}, "RobustStudy": false, "UsedForClassification": false, "UsedForMSDS": false}, "MaterialsAndMethods": {"TestMaterials": {"TestMaterialInformation": "7a31021f-0f54-4115-b16b-e08f1478d5e9/4104304f-2d53-4dc4-8ea5-99e489d0f966", "SpecificDetailsOnTestMaterialUsedForTheStudy": "#PPL-AVE100501A (until 31 Oct 2007)…	rat	Sprague-Dawley	subcutaneous	2 years	twice daily	None other:ug/kg/day, 40.0 other:ug/kg/day, 200.0 other:ug/kg/day, 1000.0 other:ug/kg/day																	Key Study Findings • There were no treatment-related effects on mortality. There were no noteworthy differences in deaths due to tumors or non-tumor causes between control and treated animals. • Treatment-related clinical signs included an increased incidence in distended abdomens and increased salivation for all treated groups. • A dose-related decrease in body weight was observed throughout the…			Key Study Findings • There were no treatment-related effects on mortality. There were no noteworthy differences in deaths due to tumors or non-tumor causes between control and treated animals. • Treatment-related clinical signs included an increased incidence in distended abdomens and increased salivation for all treated groups. • A dose-related decrease in body weight was observed throughout the…	b05b5b48-5cda-4083-b261-cea863d0a30f	FALSE	{'code': '61025', 'code (mapped)': 'histopathology: non-neoplastic'}	345
d567a1db-118f-49c6-acba-40fcf78a0d17_dossier.i6z	NDA208471-lixisenatide	320367-13-3	(4S)-5-[[2-[[(2S,3R)-1-[[(2S)-1-[[(2S,3R)-1-[[(2S)-1-[[(2S)-1-[[(2S)-1-[[(2S)-1-[[(2S)-6-amino-1-[[(2S)-5-amino-1-[[(2S)-1-[[(2S)-1-[[(2S)-1-[[(2S)-1-[[(2S)-1-[[(2S)-1-[[(2S)-1-[[(2S)-1-[[(2S)-1-[[(2S,3S)-1-[[(2S)-1-[[(2S)-1-[[(2S)-1-[[(2S)-6-amino-1-[[(2S)-4-amino-1-[[2-[[2-[(2S)-2-[[(2S)-1-[[(2S)-1-[[2-[[(2S)-1-[(2S)-2-[(2S)-2-[[(2S)-1-[[(2S)-6-amino-1-[[(2S)-6-amino-1-[[(2S)-6-amino-1-[[(2S)-6…	v2	NDA208471	ALIMENTARY TRACT AND METABOLISM	4104304f-2d53-4dc4-8ea5-99e489d0f966	d567a1db-118f-49c6-acba-40fcf78a0d17	46161388	9c1ae370-5942-4932-8ce8-4ad63191c69b	Carcinogenicity	61280	carcinogenicity, other	1895	experimental study				{"AdministrativeData": {"Endpoint": {"code": "61280"}, "StudyResultType": {"code": "1895"}, "RobustStudy": false, "UsedForClassification": false, "UsedForMSDS": false}, "MaterialsAndMethods": {"TestMaterials": {"TestMaterialInformation": "7a31021f-0f54-4115-b16b-e08f1478d5e9/4104304f-2d53-4dc4-8ea5-99e489d0f966", "SpecificDetailsOnTestMaterialUsedForTheStudy": "#PPL-AVE100501A (until 31 Oct 2007)…	rat	Sprague-Dawley	subcutaneous	2 years	twice daily	None other:ug/kg/day, 40.0 other:ug/kg/day, 200.0 other:ug/kg/day, 1000.0 other:ug/kg/day																	Key Study Findings • There were no treatment-related effects on mortality. There were no noteworthy differences in deaths due to tumors or non-tumor causes between control and treated animals. • Treatment-related clinical signs included an increased incidence in distended abdomens and increased salivation for all treated groups. • A dose-related decrease in body weight was observed throughout the…			Key Study Findings • There were no treatment-related effects on mortality. There were no noteworthy differences in deaths due to tumors or non-tumor causes between control and treated animals. • Treatment-related clinical signs included an increased incidence in distended abdomens and increased salivation for all treated groups. • A dose-related decrease in body weight was observed throughout the…	c1aa232e-df09-41d9-bf24-7335fa4bf1ee	FALSE	{'code': '2135', 'code (mapped)': 'mortality'}	1130
d567a1db-118f-49c6-acba-40fcf78a0d17_dossier.i6z	NDA208471-lixisenatide	320367-13-3	(4S)-5-[[2-[[(2S,3R)-1-[[(2S)-1-[[(2S,3R)-1-[[(2S)-1-[[(2S)-1-[[(2S)-1-[[(2S)-1-[[(2S)-6-amino-1-[[(2S)-5-amino-1-[[(2S)-1-[[(2S)-1-[[(2S)-1-[[(2S)-1-[[(2S)-1-[[(2S)-1-[[(2S)-1-[[(2S)-1-[[(2S)-1-[[(2S,3S)-1-[[(2S)-1-[[(2S)-1-[[(2S)-1-[[(2S)-6-amino-1-[[(2S)-4-amino-1-[[2-[[2-[(2S)-2-[[(2S)-1-[[(2S)-1-[[2-[[(2S)-1-[(2S)-2-[(2S)-2-[[(2S)-1-[[(2S)-6-amino-1-[[(2S)-6-amino-1-[[(2S)-6-amino-1-[[(2S)-6…	v2	NDA208471	ALIMENTARY TRACT AND METABOLISM	4104304f-2d53-4dc4-8ea5-99e489d0f966	d567a1db-118f-49c6-acba-40fcf78a0d17	46161388	9c1ae370-5942-4932-8ce8-4ad63191c69b	Carcinogenicity	61280	carcinogenicity, other	1895	experimental study				{"AdministrativeData": {"Endpoint": {"code": "61280"}, "StudyResultType": {"code": "1895"}, "RobustStudy": false, "UsedForClassification": false, "UsedForMSDS": false}, "MaterialsAndMethods": {"TestMaterials": {"TestMaterialInformation": "7a31021f-0f54-4115-b16b-e08f1478d5e9/4104304f-2d53-4dc4-8ea5-99e489d0f966", "SpecificDetailsOnTestMaterialUsedForTheStudy": "#PPL-AVE100501A (until 31 Oct 2007)…	rat	Sprague-Dawley	subcutaneous	2 years	twice daily	None other:ug/kg/day, 40.0 other:ug/kg/day, 200.0 other:ug/kg/day, 1000.0 other:ug/kg/day																	Key Study Findings • There were no treatment-related effects on mortality. There were no noteworthy differences in deaths due to tumors or non-tumor causes between control and treated animals. • Treatment-related clinical signs included an increased incidence in distended abdomens and increased salivation for all treated groups. • A dose-related decrease in body weight was observed throughout the…			Key Study Findings • There were no treatment-related effects on mortality. There were no noteworthy differences in deaths due to tumors or non-tumor causes between control and treated animals. • Treatment-related clinical signs included an increased incidence in distended abdomens and increased salivation for all treated groups. • A dose-related decrease in body weight was observed throughout the…	d69b26bd-c72d-4c5d-a0bd-e03bc253eb01	FALSE	{'code': '61025', 'code (mapped)': 'histopathology: non-neoplastic'}	345
d567a1db-118f-49c6-acba-40fcf78a0d17_dossier.i6z	NDA208471-lixisenatide	320367-13-3	(4S)-5-[[2-[[(2S,3R)-1-[[(2S)-1-[[(2S,3R)-1-[[(2S)-1-[[(2S)-1-[[(2S)-1-[[(2S)-1-[[(2S)-6-amino-1-[[(2S)-5-amino-1-[[(2S)-1-[[(2S)-1-[[(2S)-1-[[(2S)-1-[[(2S)-1-[[(2S)-1-[[(2S)-1-[[(2S)-1-[[(2S)-1-[[(2S,3S)-1-[[(2S)-1-[[(2S)-1-[[(2S)-1-[[(2S)-6-amino-1-[[(2S)-4-amino-1-[[2-[[2-[(2S)-2-[[(2S)-1-[[(2S)-1-[[2-[[(2S)-1-[(2S)-2-[(2S)-2-[[(2S)-1-[[(2S)-6-amino-1-[[(2S)-6-amino-1-[[(2S)-6-amino-1-[[(2S)-6…	v2	NDA208471	ALIMENTARY TRACT AND METABOLISM	4104304f-2d53-4dc4-8ea5-99e489d0f966	d567a1db-118f-49c6-acba-40fcf78a0d17	46161388	9c1ae370-5942-4932-8ce8-4ad63191c69b	Carcinogenicity	61280	carcinogenicity, other	1895	experimental study				{"AdministrativeData": {"Endpoint": {"code": "61280"}, "StudyResultType": {"code": "1895"}, "RobustStudy": false, "UsedForClassification": false, "UsedForMSDS": false}, "MaterialsAndMethods": {"TestMaterials": {"TestMaterialInformation": "7a31021f-0f54-4115-b16b-e08f1478d5e9/4104304f-2d53-4dc4-8ea5-99e489d0f966", "SpecificDetailsOnTestMaterialUsedForTheStudy": "#PPL-AVE100501A (until 31 Oct 2007)…	rat	Sprague-Dawley	subcutaneous	2 years	twice daily	None other:ug/kg/day, 40.0 other:ug/kg/day, 200.0 other:ug/kg/day, 1000.0 other:ug/kg/day																	Key Study Findings • There were no treatment-related effects on mortality. There were no noteworthy differences in deaths due to tumors or non-tumor causes between control and treated animals. • Treatment-related clinical signs included an increased incidence in distended abdomens and increased salivation for all treated groups. • A dose-related decrease in body weight was observed throughout the…			Key Study Findings • There were no treatment-related effects on mortality. There were no noteworthy differences in deaths due to tumors or non-tumor causes between control and treated animals. • Treatment-related clinical signs included an increased incidence in distended abdomens and increased salivation for all treated groups. • A dose-related decrease in body weight was observed throughout the…	e232cd60-fe0b-4dae-8f1b-7599da6acfcc	FALSE	{'code': '61025', 'code (mapped)': 'histopathology: non-neoplastic'}	345
d567a1db-118f-49c6-acba-40fcf78a0d17_dossier.i6z	NDA208471-lixisenatide	320367-13-3	(4S)-5-[[2-[[(2S,3R)-1-[[(2S)-1-[[(2S,3R)-1-[[(2S)-1-[[(2S)-1-[[(2S)-1-[[(2S)-1-[[(2S)-6-amino-1-[[(2S)-5-amino-1-[[(2S)-1-[[(2S)-1-[[(2S)-1-[[(2S)-1-[[(2S)-1-[[(2S)-1-[[(2S)-1-[[(2S)-1-[[(2S)-1-[[(2S,3S)-1-[[(2S)-1-[[(2S)-1-[[(2S)-1-[[(2S)-6-amino-1-[[(2S)-4-amino-1-[[2-[[2-[(2S)-2-[[(2S)-1-[[(2S)-1-[[2-[[(2S)-1-[(2S)-2-[(2S)-2-[[(2S)-1-[[(2S)-6-amino-1-[[(2S)-6-amino-1-[[(2S)-6-amino-1-[[(2S)-6…	v2	NDA208471	ALIMENTARY TRACT AND METABOLISM	4104304f-2d53-4dc4-8ea5-99e489d0f966	d567a1db-118f-49c6-acba-40fcf78a0d17	46161388	9c1ae370-5942-4932-8ce8-4ad63191c69b	Carcinogenicity	61280	carcinogenicity, other	1895	experimental study				{"AdministrativeData": {"Endpoint": {"code": "61280"}, "StudyResultType": {"code": "1895"}, "RobustStudy": false, "UsedForClassification": false, "UsedForMSDS": false}, "MaterialsAndMethods": {"TestMaterials": {"TestMaterialInformation": "7a31021f-0f54-4115-b16b-e08f1478d5e9/4104304f-2d53-4dc4-8ea5-99e489d0f966", "SpecificDetailsOnTestMaterialUsedForTheStudy": "#PPL-AVE100501A (until 31 Oct 2007)…	rat	Sprague-Dawley	subcutaneous	2 years	twice daily	None other:ug/kg/day, 40.0 other:ug/kg/day, 200.0 other:ug/kg/day, 1000.0 other:ug/kg/day																	Key Study Findings • There were no treatment-related effects on mortality. There were no noteworthy differences in deaths due to tumors or non-tumor causes between control and treated animals. • Treatment-related clinical signs included an increased incidence in distended abdomens and increased salivation for all treated groups. • A dose-related decrease in body weight was observed throughout the…			Key Study Findings • There were no treatment-related effects on mortality. There were no noteworthy differences in deaths due to tumors or non-tumor causes between control and treated animals. • Treatment-related clinical signs included an increased incidence in distended abdomens and increased salivation for all treated groups. • A dose-related decrease in body weight was observed throughout the…	ebe2dd40-6e89-434b-b73d-3891f07588bb	FALSE	{'code': '61026', 'code (mapped)': 'histopathology: neoplastic'}	345
d567a1db-118f-49c6-acba-40fcf78a0d17_dossier.i6z	NDA208471-lixisenatide	320367-13-3	(4S)-5-[[2-[[(2S,3R)-1-[[(2S)-1-[[(2S,3R)-1-[[(2S)-1-[[(2S)-1-[[(2S)-1-[[(2S)-1-[[(2S)-6-amino-1-[[(2S)-5-amino-1-[[(2S)-1-[[(2S)-1-[[(2S)-1-[[(2S)-1-[[(2S)-1-[[(2S)-1-[[(2S)-1-[[(2S)-1-[[(2S)-1-[[(2S,3S)-1-[[(2S)-1-[[(2S)-1-[[(2S)-1-[[(2S)-6-amino-1-[[(2S)-4-amino-1-[[2-[[2-[(2S)-2-[[(2S)-1-[[(2S)-1-[[2-[[(2S)-1-[(2S)-2-[(2S)-2-[[(2S)-1-[[(2S)-6-amino-1-[[(2S)-6-amino-1-[[(2S)-6-amino-1-[[(2S)-6…	v2	NDA208471	ALIMENTARY TRACT AND METABOLISM	4104304f-2d53-4dc4-8ea5-99e489d0f966	d567a1db-118f-49c6-acba-40fcf78a0d17	46161388	9c1ae370-5942-4932-8ce8-4ad63191c69b	Carcinogenicity	61280	carcinogenicity, other	1895	experimental study				{"AdministrativeData": {"Endpoint": {"code": "61280"}, "StudyResultType": {"code": "1895"}, "RobustStudy": false, "UsedForClassification": false, "UsedForMSDS": false}, "MaterialsAndMethods": {"TestMaterials": {"TestMaterialInformation": "7a31021f-0f54-4115-b16b-e08f1478d5e9/4104304f-2d53-4dc4-8ea5-99e489d0f966", "SpecificDetailsOnTestMaterialUsedForTheStudy": "#PPL-AVE100501A (until 31 Oct 2007)…	rat	Sprague-Dawley	subcutaneous	2 years	twice daily	None other:ug/kg/day, 40.0 other:ug/kg/day, 200.0 other:ug/kg/day, 1000.0 other:ug/kg/day																	Key Study Findings • There were no treatment-related effects on mortality. There were no noteworthy differences in deaths due to tumors or non-tumor causes between control and treated animals. • Treatment-related clinical signs included an increased incidence in distended abdomens and increased salivation for all treated groups. • A dose-related decrease in body weight was observed throughout the…			Key Study Findings • There were no treatment-related effects on mortality. There were no noteworthy differences in deaths due to tumors or non-tumor causes between control and treated animals. • Treatment-related clinical signs included an increased incidence in distended abdomens and increased salivation for all treated groups. • A dose-related decrease in body weight was observed throughout the…	ecc5935a-f2f8-49a9-8e94-636ba622ca4f	FALSE	{'code': '61025', 'code (mapped)': 'histopathology: non-neoplastic'}	345
d567a1db-118f-49c6-acba-40fcf78a0d17_dossier.i6z	NDA208471-lixisenatide	320367-13-3	(4S)-5-[[2-[[(2S,3R)-1-[[(2S)-1-[[(2S,3R)-1-[[(2S)-1-[[(2S)-1-[[(2S)-1-[[(2S)-1-[[(2S)-6-amino-1-[[(2S)-5-amino-1-[[(2S)-1-[[(2S)-1-[[(2S)-1-[[(2S)-1-[[(2S)-1-[[(2S)-1-[[(2S)-1-[[(2S)-1-[[(2S)-1-[[(2S,3S)-1-[[(2S)-1-[[(2S)-1-[[(2S)-1-[[(2S)-6-amino-1-[[(2S)-4-amino-1-[[2-[[2-[(2S)-2-[[(2S)-1-[[(2S)-1-[[2-[[(2S)-1-[(2S)-2-[(2S)-2-[[(2S)-1-[[(2S)-6-amino-1-[[(2S)-6-amino-1-[[(2S)-6-amino-1-[[(2S)-6…	v2	NDA208471	ALIMENTARY TRACT AND METABOLISM	4104304f-2d53-4dc4-8ea5-99e489d0f966	d567a1db-118f-49c6-acba-40fcf78a0d17	46161388	9c1ae370-5942-4932-8ce8-4ad63191c69b	Carcinogenicity	61280	carcinogenicity, other	1895	experimental study				{"AdministrativeData": {"Endpoint": {"code": "61280"}, "StudyResultType": {"code": "1895"}, "RobustStudy": false, "UsedForClassification": false, "UsedForMSDS": false}, "MaterialsAndMethods": {"TestMaterials": {"TestMaterialInformation": "7a31021f-0f54-4115-b16b-e08f1478d5e9/4104304f-2d53-4dc4-8ea5-99e489d0f966", "SpecificDetailsOnTestMaterialUsedForTheStudy": "#PPL-AVE100501A (until 31 Oct 2007)…	rat	Sprague-Dawley	subcutaneous	2 years	twice daily	None other:ug/kg/day, 40.0 other:ug/kg/day, 200.0 other:ug/kg/day, 1000.0 other:ug/kg/day																	Key Study Findings • There were no treatment-related effects on mortality. There were no noteworthy differences in deaths due to tumors or non-tumor causes between control and treated animals. • Treatment-related clinical signs included an increased incidence in distended abdomens and increased salivation for all treated groups. • A dose-related decrease in body weight was observed throughout the…			Key Study Findings • There were no treatment-related effects on mortality. There were no noteworthy differences in deaths due to tumors or non-tumor causes between control and treated animals. • Treatment-related clinical signs included an increased incidence in distended abdomens and increased salivation for all treated groups. • A dose-related decrease in body weight was observed throughout the…	ecc5935a-f2f8-49a9-8e94-636ba622ca4f	FALSE	{'code': '61025', 'code (mapped)': 'histopathology: non-neoplastic'}	345
d567a1db-118f-49c6-acba-40fcf78a0d17_dossier.i6z	NDA208471-lixisenatide	320367-13-3	(4S)-5-[[2-[[(2S,3R)-1-[[(2S)-1-[[(2S,3R)-1-[[(2S)-1-[[(2S)-1-[[(2S)-1-[[(2S)-1-[[(2S)-6-amino-1-[[(2S)-5-amino-1-[[(2S)-1-[[(2S)-1-[[(2S)-1-[[(2S)-1-[[(2S)-1-[[(2S)-1-[[(2S)-1-[[(2S)-1-[[(2S)-1-[[(2S,3S)-1-[[(2S)-1-[[(2S)-1-[[(2S)-1-[[(2S)-6-amino-1-[[(2S)-4-amino-1-[[2-[[2-[(2S)-2-[[(2S)-1-[[(2S)-1-[[2-[[(2S)-1-[(2S)-2-[(2S)-2-[[(2S)-1-[[(2S)-6-amino-1-[[(2S)-6-amino-1-[[(2S)-6-amino-1-[[(2S)-6…	v2	NDA208471	ALIMENTARY TRACT AND METABOLISM	4104304f-2d53-4dc4-8ea5-99e489d0f966	d567a1db-118f-49c6-acba-40fcf78a0d17	46161388	9c1ae370-5942-4932-8ce8-4ad63191c69b	Carcinogenicity	61280	carcinogenicity, other	1895	experimental study				{"AdministrativeData": {"Endpoint": {"code": "61280"}, "StudyResultType": {"code": "1895"}, "RobustStudy": false, "UsedForClassification": false, "UsedForMSDS": false}, "MaterialsAndMethods": {"TestMaterials": {"TestMaterialInformation": "7a31021f-0f54-4115-b16b-e08f1478d5e9/4104304f-2d53-4dc4-8ea5-99e489d0f966", "SpecificDetailsOnTestMaterialUsedForTheStudy": "#PPL-AVE100501A (until 31 Oct 2007)…	rat	Sprague-Dawley	subcutaneous	2 years	twice daily	None other:ug/kg/day, 40.0 other:ug/kg/day, 200.0 other:ug/kg/day, 1000.0 other:ug/kg/day																	Key Study Findings • There were no treatment-related effects on mortality. There were no noteworthy differences in deaths due to tumors or non-tumor causes between control and treated animals. • Treatment-related clinical signs included an increased incidence in distended abdomens and increased salivation for all treated groups. • A dose-related decrease in body weight was observed throughout the…			Key Study Findings • There were no treatment-related effects on mortality. There were no noteworthy differences in deaths due to tumors or non-tumor causes between control and treated animals. • Treatment-related clinical signs included an increased incidence in distended abdomens and increased salivation for all treated groups. • A dose-related decrease in body weight was observed throughout the…	f4e44ce2-64fd-4f4f-b3fe-d7b7241edd2e	FALSE	{'code': '61012', 'code (mapped)': 'body weight and weight gain'}	345
d567a1db-118f-49c6-acba-40fcf78a0d17_dossier.i6z	NDA208471-lixisenatide	320367-13-3	(4S)-5-[[2-[[(2S,3R)-1-[[(2S)-1-[[(2S,3R)-1-[[(2S)-1-[[(2S)-1-[[(2S)-1-[[(2S)-1-[[(2S)-6-amino-1-[[(2S)-5-amino-1-[[(2S)-1-[[(2S)-1-[[(2S)-1-[[(2S)-1-[[(2S)-1-[[(2S)-1-[[(2S)-1-[[(2S)-1-[[(2S)-1-[[(2S,3S)-1-[[(2S)-1-[[(2S)-1-[[(2S)-1-[[(2S)-6-amino-1-[[(2S)-4-amino-1-[[2-[[2-[(2S)-2-[[(2S)-1-[[(2S)-1-[[2-[[(2S)-1-[(2S)-2-[(2S)-2-[[(2S)-1-[[(2S)-6-amino-1-[[(2S)-6-amino-1-[[(2S)-6-amino-1-[[(2S)-6…	v2	NDA208471	ALIMENTARY TRACT AND METABOLISM	4104304f-2d53-4dc4-8ea5-99e489d0f966	d567a1db-118f-49c6-acba-40fcf78a0d17	46161388	9c1ae370-5942-4932-8ce8-4ad63191c69b	Carcinogenicity	61280	carcinogenicity, other	1895	experimental study				{"AdministrativeData": {"Endpoint": {"code": "61280"}, "StudyResultType": {"code": "1895"}, "RobustStudy": false, "UsedForClassification": false, "UsedForMSDS": false}, "MaterialsAndMethods": {"TestMaterials": {"TestMaterialInformation": "7a31021f-0f54-4115-b16b-e08f1478d5e9/4104304f-2d53-4dc4-8ea5-99e489d0f966", "SpecificDetailsOnTestMaterialUsedForTheStudy": "#PPL-AVE100501A (until 31 Oct 2007)…	rat	Sprague-Dawley	subcutaneous	2 years	twice daily	None other:ug/kg/day, 40.0 other:ug/kg/day, 200.0 other:ug/kg/day, 1000.0 other:ug/kg/day																	Key Study Findings • There were no treatment-related effects on mortality. There were no noteworthy differences in deaths due to tumors or non-tumor causes between control and treated animals. • Treatment-related clinical signs included an increased incidence in distended abdomens and increased salivation for all treated groups. • A dose-related decrease in body weight was observed throughout the…			Key Study Findings • There were no treatment-related effects on mortality. There were no noteworthy differences in deaths due to tumors or non-tumor causes between control and treated animals. • Treatment-related clinical signs included an increased incidence in distended abdomens and increased salivation for all treated groups. • A dose-related decrease in body weight was observed throughout the…	f4e44ce2-64fd-4f4f-b3fe-d7b7241edd2e	FALSE	{'code': '61012', 'code (mapped)': 'body weight and weight gain'}	345
d567a1db-118f-49c6-acba-40fcf78a0d17_dossier.i6z	NDA208471-lixisenatide	320367-13-3	(4S)-5-[[2-[[(2S,3R)-1-[[(2S)-1-[[(2S,3R)-1-[[(2S)-1-[[(2S)-1-[[(2S)-1-[[(2S)-1-[[(2S)-6-amino-1-[[(2S)-5-amino-1-[[(2S)-1-[[(2S)-1-[[(2S)-1-[[(2S)-1-[[(2S)-1-[[(2S)-1-[[(2S)-1-[[(2S)-1-[[(2S)-1-[[(2S,3S)-1-[[(2S)-1-[[(2S)-1-[[(2S)-1-[[(2S)-6-amino-1-[[(2S)-4-amino-1-[[2-[[2-[(2S)-2-[[(2S)-1-[[(2S)-1-[[2-[[(2S)-1-[(2S)-2-[(2S)-2-[[(2S)-1-[[(2S)-6-amino-1-[[(2S)-6-amino-1-[[(2S)-6-amino-1-[[(2S)-6…	v2	NDA208471	ALIMENTARY TRACT AND METABOLISM	4104304f-2d53-4dc4-8ea5-99e489d0f966	d567a1db-118f-49c6-acba-40fcf78a0d17	46161388	9c1ae370-5942-4932-8ce8-4ad63191c69b	Carcinogenicity	61280	carcinogenicity, other	1895	experimental study				{"AdministrativeData": {"Endpoint": {"code": "61280"}, "StudyResultType": {"code": "1895"}, "RobustStudy": false, "UsedForClassification": false, "UsedForMSDS": false}, "MaterialsAndMethods": {"TestMaterials": {"TestMaterialInformation": "7a31021f-0f54-4115-b16b-e08f1478d5e9/4104304f-2d53-4dc4-8ea5-99e489d0f966", "SpecificDetailsOnTestMaterialUsedForTheStudy": "#PPL-AVE100501A (until 31 Oct 2007)…	rat	Sprague-Dawley	subcutaneous	2 years	twice daily	None other:ug/kg/day, 40.0 other:ug/kg/day, 200.0 other:ug/kg/day, 1000.0 other:ug/kg/day																	Key Study Findings • There were no treatment-related effects on mortality. There were no noteworthy differences in deaths due to tumors or non-tumor causes between control and treated animals. • Treatment-related clinical signs included an increased incidence in distended abdomens and increased salivation for all treated groups. • A dose-related decrease in body weight was observed throughout the…			Key Study Findings • There were no treatment-related effects on mortality. There were no noteworthy differences in deaths due to tumors or non-tumor causes between control and treated animals. • Treatment-related clinical signs included an increased incidence in distended abdomens and increased salivation for all treated groups. • A dose-related decrease in body weight was observed throughout the…	f4e44ce2-64fd-4f4f-b3fe-d7b7241edd2e	FALSE	{'code': '61012', 'code (mapped)': 'body weight and weight gain'}	345
d567a1db-118f-49c6-acba-40fcf78a0d17_dossier.i6z	NDA208471-lixisenatide	320367-13-3	(4S)-5-[[2-[[(2S,3R)-1-[[(2S)-1-[[(2S,3R)-1-[[(2S)-1-[[(2S)-1-[[(2S)-1-[[(2S)-1-[[(2S)-6-amino-1-[[(2S)-5-amino-1-[[(2S)-1-[[(2S)-1-[[(2S)-1-[[(2S)-1-[[(2S)-1-[[(2S)-1-[[(2S)-1-[[(2S)-1-[[(2S)-1-[[(2S,3S)-1-[[(2S)-1-[[(2S)-1-[[(2S)-1-[[(2S)-6-amino-1-[[(2S)-4-amino-1-[[2-[[2-[(2S)-2-[[(2S)-1-[[(2S)-1-[[2-[[(2S)-1-[(2S)-2-[(2S)-2-[[(2S)-1-[[(2S)-6-amino-1-[[(2S)-6-amino-1-[[(2S)-6-amino-1-[[(2S)-6…	v2	NDA208471	ALIMENTARY TRACT AND METABOLISM	4104304f-2d53-4dc4-8ea5-99e489d0f966	d567a1db-118f-49c6-acba-40fcf78a0d17	46161388	9c1ae370-5942-4932-8ce8-4ad63191c69b	Carcinogenicity	61280	carcinogenicity, other	1895	experimental study				{"AdministrativeData": {"Endpoint": {"code": "61280"}, "StudyResultType": {"code": "1895"}, "RobustStudy": false, "UsedForClassification": false, "UsedForMSDS": false}, "MaterialsAndMethods": {"TestMaterials": {"TestMaterialInformation": "7a31021f-0f54-4115-b16b-e08f1478d5e9/4104304f-2d53-4dc4-8ea5-99e489d0f966", "SpecificDetailsOnTestMaterialUsedForTheStudy": "#PPL-AVE100501A (until 31 Oct 2007)…	rat	Sprague-Dawley	subcutaneous	2 years	twice daily	None other:ug/kg/day, 40.0 other:ug/kg/day, 200.0 other:ug/kg/day, 1000.0 other:ug/kg/day																	Key Study Findings • There were no treatment-related effects on mortality. There were no noteworthy differences in deaths due to tumors or non-tumor causes between control and treated animals. • Treatment-related clinical signs included an increased incidence in distended abdomens and increased salivation for all treated groups. • A dose-related decrease in body weight was observed throughout the…			Key Study Findings • There were no treatment-related effects on mortality. There were no noteworthy differences in deaths due to tumors or non-tumor causes between control and treated animals. • Treatment-related clinical signs included an increased incidence in distended abdomens and increased salivation for all treated groups. • A dose-related decrease in body weight was observed throughout the…	fc32d326-11ae-4425-ab23-5f51b28af8b0	FALSE	{'code': '61023', 'code (mapped)': 'gross pathology'}	345
d567a1db-118f-49c6-acba-40fcf78a0d17_dossier.i6z	NDA208471-lixisenatide	320367-13-3	(4S)-5-[[2-[[(2S,3R)-1-[[(2S)-1-[[(2S,3R)-1-[[(2S)-1-[[(2S)-1-[[(2S)-1-[[(2S)-1-[[(2S)-6-amino-1-[[(2S)-5-amino-1-[[(2S)-1-[[(2S)-1-[[(2S)-1-[[(2S)-1-[[(2S)-1-[[(2S)-1-[[(2S)-1-[[(2S)-1-[[(2S)-1-[[(2S,3S)-1-[[(2S)-1-[[(2S)-1-[[(2S)-1-[[(2S)-6-amino-1-[[(2S)-4-amino-1-[[2-[[2-[(2S)-2-[[(2S)-1-[[(2S)-1-[[2-[[(2S)-1-[(2S)-2-[(2S)-2-[[(2S)-1-[[(2S)-6-amino-1-[[(2S)-6-amino-1-[[(2S)-6-amino-1-[[(2S)-6…	v2	NDA208471	ALIMENTARY TRACT AND METABOLISM	4104304f-2d53-4dc4-8ea5-99e489d0f966	d567a1db-118f-49c6-acba-40fcf78a0d17	46161383	4eee6cbb-7f25-48f8-912e-3d308f5c848b	Carcinogenicity	61280	carcinogenicity, other	1895	experimental study				{"AdministrativeData": {"Endpoint": {"code": "61280"}, "StudyResultType": {"code": "1895"}, "RobustStudy": false, "UsedForClassification": false, "UsedForMSDS": false}, "MaterialsAndMethods": {"TestMaterials": {"TestMaterialInformation": "7a31021f-0f54-4115-b16b-e08f1478d5e9/4104304f-2d53-4dc4-8ea5-99e489d0f966", "SpecificDetailsOnTestMaterialUsedForTheStudy": "#PPL-AVE100501A (until 31 Oct 2007)…	mouse	CD-1	subcutaneous	2 years	twice daily	None other:ug/kg/day, 40.0 other:ug/kg/day, 200.0 other:ug/kg/day, 1000.0 other:ug/kg/day																	Key Study Findings • There were no treatment-related effects on mortality. There were no noteworthy differences in deaths due to tumors or non-tumor causes between control and treated animals. • Treatment-related clinical signs included an increased incidence in distended abdomens for all treated groups and a slight increase in corneal opacity for high-dose males and females. • A dose-related inc…			Key Study Findings • There were no treatment-related effects on mortality. There were no noteworthy differences in deaths due to tumors or non-tumor causes between control and treated animals. • Treatment-related clinical signs included an increased incidence in distended abdomens for all treated groups and a slight increase in corneal opacity for high-dose males and females. • A dose-related inc…	0d7e3a2d-7353-42c5-8baa-9961ed79be93	FALSE	{'code': '61025', 'code (mapped)': 'histopathology: non-neoplastic'}	345
d567a1db-118f-49c6-acba-40fcf78a0d17_dossier.i6z	NDA208471-lixisenatide	320367-13-3	(4S)-5-[[2-[[(2S,3R)-1-[[(2S)-1-[[(2S,3R)-1-[[(2S)-1-[[(2S)-1-[[(2S)-1-[[(2S)-1-[[(2S)-6-amino-1-[[(2S)-5-amino-1-[[(2S)-1-[[(2S)-1-[[(2S)-1-[[(2S)-1-[[(2S)-1-[[(2S)-1-[[(2S)-1-[[(2S)-1-[[(2S)-1-[[(2S,3S)-1-[[(2S)-1-[[(2S)-1-[[(2S)-1-[[(2S)-6-amino-1-[[(2S)-4-amino-1-[[2-[[2-[(2S)-2-[[(2S)-1-[[(2S)-1-[[2-[[(2S)-1-[(2S)-2-[(2S)-2-[[(2S)-1-[[(2S)-6-amino-1-[[(2S)-6-amino-1-[[(2S)-6-amino-1-[[(2S)-6…	v2	NDA208471	ALIMENTARY TRACT AND METABOLISM	4104304f-2d53-4dc4-8ea5-99e489d0f966	d567a1db-118f-49c6-acba-40fcf78a0d17	46161383	4eee6cbb-7f25-48f8-912e-3d308f5c848b	Carcinogenicity	61280	carcinogenicity, other	1895	experimental study				{"AdministrativeData": {"Endpoint": {"code": "61280"}, "StudyResultType": {"code": "1895"}, "RobustStudy": false, "UsedForClassification": false, "UsedForMSDS": false}, "MaterialsAndMethods": {"TestMaterials": {"TestMaterialInformation": "7a31021f-0f54-4115-b16b-e08f1478d5e9/4104304f-2d53-4dc4-8ea5-99e489d0f966", "SpecificDetailsOnTestMaterialUsedForTheStudy": "#PPL-AVE100501A (until 31 Oct 2007)…	mouse	CD-1	subcutaneous	2 years	twice daily	None other:ug/kg/day, 40.0 other:ug/kg/day, 200.0 other:ug/kg/day, 1000.0 other:ug/kg/day																	Key Study Findings • There were no treatment-related effects on mortality. There were no noteworthy differences in deaths due to tumors or non-tumor causes between control and treated animals. • Treatment-related clinical signs included an increased incidence in distended abdomens for all treated groups and a slight increase in corneal opacity for high-dose males and females. • A dose-related inc…			Key Study Findings • There were no treatment-related effects on mortality. There were no noteworthy differences in deaths due to tumors or non-tumor causes between control and treated animals. • Treatment-related clinical signs included an increased incidence in distended abdomens for all treated groups and a slight increase in corneal opacity for high-dose males and females. • A dose-related inc…	3564bc97-1160-442f-a16e-09ced2eafb49	FALSE	{'code': '61025', 'code (mapped)': 'histopathology: non-neoplastic'}	345
d567a1db-118f-49c6-acba-40fcf78a0d17_dossier.i6z	NDA208471-lixisenatide	320367-13-3	(4S)-5-[[2-[[(2S,3R)-1-[[(2S)-1-[[(2S,3R)-1-[[(2S)-1-[[(2S)-1-[[(2S)-1-[[(2S)-1-[[(2S)-6-amino-1-[[(2S)-5-amino-1-[[(2S)-1-[[(2S)-1-[[(2S)-1-[[(2S)-1-[[(2S)-1-[[(2S)-1-[[(2S)-1-[[(2S)-1-[[(2S)-1-[[(2S,3S)-1-[[(2S)-1-[[(2S)-1-[[(2S)-1-[[(2S)-6-amino-1-[[(2S)-4-amino-1-[[2-[[2-[(2S)-2-[[(2S)-1-[[(2S)-1-[[2-[[(2S)-1-[(2S)-2-[(2S)-2-[[(2S)-1-[[(2S)-6-amino-1-[[(2S)-6-amino-1-[[(2S)-6-amino-1-[[(2S)-6…	v2	NDA208471	ALIMENTARY TRACT AND METABOLISM	4104304f-2d53-4dc4-8ea5-99e489d0f966	d567a1db-118f-49c6-acba-40fcf78a0d17	46161383	4eee6cbb-7f25-48f8-912e-3d308f5c848b	Carcinogenicity	61280	carcinogenicity, other	1895	experimental study				{"AdministrativeData": {"Endpoint": {"code": "61280"}, "StudyResultType": {"code": "1895"}, "RobustStudy": false, "UsedForClassification": false, "UsedForMSDS": false}, "MaterialsAndMethods": {"TestMaterials": {"TestMaterialInformation": "7a31021f-0f54-4115-b16b-e08f1478d5e9/4104304f-2d53-4dc4-8ea5-99e489d0f966", "SpecificDetailsOnTestMaterialUsedForTheStudy": "#PPL-AVE100501A (until 31 Oct 2007)…	mouse	CD-1	subcutaneous	2 years	twice daily	None other:ug/kg/day, 40.0 other:ug/kg/day, 200.0 other:ug/kg/day, 1000.0 other:ug/kg/day																	Key Study Findings • There were no treatment-related effects on mortality. There were no noteworthy differences in deaths due to tumors or non-tumor causes between control and treated animals. • Treatment-related clinical signs included an increased incidence in distended abdomens for all treated groups and a slight increase in corneal opacity for high-dose males and females. • A dose-related inc…			Key Study Findings • There were no treatment-related effects on mortality. There were no noteworthy differences in deaths due to tumors or non-tumor causes between control and treated animals. • Treatment-related clinical signs included an increased incidence in distended abdomens for all treated groups and a slight increase in corneal opacity for high-dose males and females. • A dose-related inc…	36f3a6b7-6017-481f-8648-7b34dd6ba1be	FALSE	{'code': '61023', 'code (mapped)': 'gross pathology'}	345
d567a1db-118f-49c6-acba-40fcf78a0d17_dossier.i6z	NDA208471-lixisenatide	320367-13-3	(4S)-5-[[2-[[(2S,3R)-1-[[(2S)-1-[[(2S,3R)-1-[[(2S)-1-[[(2S)-1-[[(2S)-1-[[(2S)-1-[[(2S)-6-amino-1-[[(2S)-5-amino-1-[[(2S)-1-[[(2S)-1-[[(2S)-1-[[(2S)-1-[[(2S)-1-[[(2S)-1-[[(2S)-1-[[(2S)-1-[[(2S)-1-[[(2S,3S)-1-[[(2S)-1-[[(2S)-1-[[(2S)-1-[[(2S)-6-amino-1-[[(2S)-4-amino-1-[[2-[[2-[(2S)-2-[[(2S)-1-[[(2S)-1-[[2-[[(2S)-1-[(2S)-2-[(2S)-2-[[(2S)-1-[[(2S)-6-amino-1-[[(2S)-6-amino-1-[[(2S)-6-amino-1-[[(2S)-6…	v2	NDA208471	ALIMENTARY TRACT AND METABOLISM	4104304f-2d53-4dc4-8ea5-99e489d0f966	d567a1db-118f-49c6-acba-40fcf78a0d17	46161383	4eee6cbb-7f25-48f8-912e-3d308f5c848b	Carcinogenicity	61280	carcinogenicity, other	1895	experimental study				{"AdministrativeData": {"Endpoint": {"code": "61280"}, "StudyResultType": {"code": "1895"}, "RobustStudy": false, "UsedForClassification": false, "UsedForMSDS": false}, "MaterialsAndMethods": {"TestMaterials": {"TestMaterialInformation": "7a31021f-0f54-4115-b16b-e08f1478d5e9/4104304f-2d53-4dc4-8ea5-99e489d0f966", "SpecificDetailsOnTestMaterialUsedForTheStudy": "#PPL-AVE100501A (until 31 Oct 2007)…	mouse	CD-1	subcutaneous	2 years	twice daily	None other:ug/kg/day, 40.0 other:ug/kg/day, 200.0 other:ug/kg/day, 1000.0 other:ug/kg/day																	Key Study Findings • There were no treatment-related effects on mortality. There were no noteworthy differences in deaths due to tumors or non-tumor causes between control and treated animals. • Treatment-related clinical signs included an increased incidence in distended abdomens for all treated groups and a slight increase in corneal opacity for high-dose males and females. • A dose-related inc…			Key Study Findings • There were no treatment-related effects on mortality. There were no noteworthy differences in deaths due to tumors or non-tumor causes between control and treated animals. • Treatment-related clinical signs included an increased incidence in distended abdomens for all treated groups and a slight increase in corneal opacity for high-dose males and females. • A dose-related inc…	36f3a6b7-6017-481f-8648-7b34dd6ba1be	FALSE	{'code': '61023', 'code (mapped)': 'gross pathology'}	345
d567a1db-118f-49c6-acba-40fcf78a0d17_dossier.i6z	NDA208471-lixisenatide	320367-13-3	(4S)-5-[[2-[[(2S,3R)-1-[[(2S)-1-[[(2S,3R)-1-[[(2S)-1-[[(2S)-1-[[(2S)-1-[[(2S)-1-[[(2S)-6-amino-1-[[(2S)-5-amino-1-[[(2S)-1-[[(2S)-1-[[(2S)-1-[[(2S)-1-[[(2S)-1-[[(2S)-1-[[(2S)-1-[[(2S)-1-[[(2S)-1-[[(2S,3S)-1-[[(2S)-1-[[(2S)-1-[[(2S)-1-[[(2S)-6-amino-1-[[(2S)-4-amino-1-[[2-[[2-[(2S)-2-[[(2S)-1-[[(2S)-1-[[2-[[(2S)-1-[(2S)-2-[(2S)-2-[[(2S)-1-[[(2S)-6-amino-1-[[(2S)-6-amino-1-[[(2S)-6-amino-1-[[(2S)-6…	v2	NDA208471	ALIMENTARY TRACT AND METABOLISM	4104304f-2d53-4dc4-8ea5-99e489d0f966	d567a1db-118f-49c6-acba-40fcf78a0d17	46161383	4eee6cbb-7f25-48f8-912e-3d308f5c848b	Carcinogenicity	61280	carcinogenicity, other	1895	experimental study				{"AdministrativeData": {"Endpoint": {"code": "61280"}, "StudyResultType": {"code": "1895"}, "RobustStudy": false, "UsedForClassification": false, "UsedForMSDS": false}, "MaterialsAndMethods": {"TestMaterials": {"TestMaterialInformation": "7a31021f-0f54-4115-b16b-e08f1478d5e9/4104304f-2d53-4dc4-8ea5-99e489d0f966", "SpecificDetailsOnTestMaterialUsedForTheStudy": "#PPL-AVE100501A (until 31 Oct 2007)…	mouse	CD-1	subcutaneous	2 years	twice daily	None other:ug/kg/day, 40.0 other:ug/kg/day, 200.0 other:ug/kg/day, 1000.0 other:ug/kg/day																	Key Study Findings • There were no treatment-related effects on mortality. There were no noteworthy differences in deaths due to tumors or non-tumor causes between control and treated animals. • Treatment-related clinical signs included an increased incidence in distended abdomens for all treated groups and a slight increase in corneal opacity for high-dose males and females. • A dose-related inc…			Key Study Findings • There were no treatment-related effects on mortality. There were no noteworthy differences in deaths due to tumors or non-tumor causes between control and treated animals. • Treatment-related clinical signs included an increased incidence in distended abdomens for all treated groups and a slight increase in corneal opacity for high-dose males and females. • A dose-related inc…	428ca0b0-bdd9-4037-95f9-bc2958f02d1f	FALSE	{'code': '61025', 'code (mapped)': 'histopathology: non-neoplastic'}	345
d567a1db-118f-49c6-acba-40fcf78a0d17_dossier.i6z	NDA208471-lixisenatide	320367-13-3	(4S)-5-[[2-[[(2S,3R)-1-[[(2S)-1-[[(2S,3R)-1-[[(2S)-1-[[(2S)-1-[[(2S)-1-[[(2S)-1-[[(2S)-6-amino-1-[[(2S)-5-amino-1-[[(2S)-1-[[(2S)-1-[[(2S)-1-[[(2S)-1-[[(2S)-1-[[(2S)-1-[[(2S)-1-[[(2S)-1-[[(2S)-1-[[(2S,3S)-1-[[(2S)-1-[[(2S)-1-[[(2S)-1-[[(2S)-6-amino-1-[[(2S)-4-amino-1-[[2-[[2-[(2S)-2-[[(2S)-1-[[(2S)-1-[[2-[[(2S)-1-[(2S)-2-[(2S)-2-[[(2S)-1-[[(2S)-6-amino-1-[[(2S)-6-amino-1-[[(2S)-6-amino-1-[[(2S)-6…	v2	NDA208471	ALIMENTARY TRACT AND METABOLISM	4104304f-2d53-4dc4-8ea5-99e489d0f966	d567a1db-118f-49c6-acba-40fcf78a0d17	46161383	4eee6cbb-7f25-48f8-912e-3d308f5c848b	Carcinogenicity	61280	carcinogenicity, other	1895	experimental study				{"AdministrativeData": {"Endpoint": {"code": "61280"}, "StudyResultType": {"code": "1895"}, "RobustStudy": false, "UsedForClassification": false, "UsedForMSDS": false}, "MaterialsAndMethods": {"TestMaterials": {"TestMaterialInformation": "7a31021f-0f54-4115-b16b-e08f1478d5e9/4104304f-2d53-4dc4-8ea5-99e489d0f966", "SpecificDetailsOnTestMaterialUsedForTheStudy": "#PPL-AVE100501A (until 31 Oct 2007)…	mouse	CD-1	subcutaneous	2 years	twice daily	None other:ug/kg/day, 40.0 other:ug/kg/day, 200.0 other:ug/kg/day, 1000.0 other:ug/kg/day																	Key Study Findings • There were no treatment-related effects on mortality. There were no noteworthy differences in deaths due to tumors or non-tumor causes between control and treated animals. • Treatment-related clinical signs included an increased incidence in distended abdomens for all treated groups and a slight increase in corneal opacity for high-dose males and females. • A dose-related inc…			Key Study Findings • There were no treatment-related effects on mortality. There were no noteworthy differences in deaths due to tumors or non-tumor causes between control and treated animals. • Treatment-related clinical signs included an increased incidence in distended abdomens for all treated groups and a slight increase in corneal opacity for high-dose males and females. • A dose-related inc…	47823d0e-8673-46f7-8b97-20f3b73d5c9b	FALSE	{'code': '61025', 'code (mapped)': 'histopathology: non-neoplastic'}	345
d567a1db-118f-49c6-acba-40fcf78a0d17_dossier.i6z	NDA208471-lixisenatide	320367-13-3	(4S)-5-[[2-[[(2S,3R)-1-[[(2S)-1-[[(2S,3R)-1-[[(2S)-1-[[(2S)-1-[[(2S)-1-[[(2S)-1-[[(2S)-6-amino-1-[[(2S)-5-amino-1-[[(2S)-1-[[(2S)-1-[[(2S)-1-[[(2S)-1-[[(2S)-1-[[(2S)-1-[[(2S)-1-[[(2S)-1-[[(2S)-1-[[(2S,3S)-1-[[(2S)-1-[[(2S)-1-[[(2S)-1-[[(2S)-6-amino-1-[[(2S)-4-amino-1-[[2-[[2-[(2S)-2-[[(2S)-1-[[(2S)-1-[[2-[[(2S)-1-[(2S)-2-[(2S)-2-[[(2S)-1-[[(2S)-6-amino-1-[[(2S)-6-amino-1-[[(2S)-6-amino-1-[[(2S)-6…	v2	NDA208471	ALIMENTARY TRACT AND METABOLISM	4104304f-2d53-4dc4-8ea5-99e489d0f966	d567a1db-118f-49c6-acba-40fcf78a0d17	46161383	4eee6cbb-7f25-48f8-912e-3d308f5c848b	Carcinogenicity	61280	carcinogenicity, other	1895	experimental study				{"AdministrativeData": {"Endpoint": {"code": "61280"}, "StudyResultType": {"code": "1895"}, "RobustStudy": false, "UsedForClassification": false, "UsedForMSDS": false}, "MaterialsAndMethods": {"TestMaterials": {"TestMaterialInformation": "7a31021f-0f54-4115-b16b-e08f1478d5e9/4104304f-2d53-4dc4-8ea5-99e489d0f966", "SpecificDetailsOnTestMaterialUsedForTheStudy": "#PPL-AVE100501A (until 31 Oct 2007)…	mouse	CD-1	subcutaneous	2 years	twice daily	None other:ug/kg/day, 40.0 other:ug/kg/day, 200.0 other:ug/kg/day, 1000.0 other:ug/kg/day																	Key Study Findings • There were no treatment-related effects on mortality. There were no noteworthy differences in deaths due to tumors or non-tumor causes between control and treated animals. • Treatment-related clinical signs included an increased incidence in distended abdomens for all treated groups and a slight increase in corneal opacity for high-dose males and females. • A dose-related inc…			Key Study Findings • There were no treatment-related effects on mortality. There were no noteworthy differences in deaths due to tumors or non-tumor causes between control and treated animals. • Treatment-related clinical signs included an increased incidence in distended abdomens for all treated groups and a slight increase in corneal opacity for high-dose males and females. • A dose-related inc…	47823d0e-8673-46f7-8b97-20f3b73d5c9b	FALSE	{'code': '61025', 'code (mapped)': 'histopathology: non-neoplastic'}	345
d567a1db-118f-49c6-acba-40fcf78a0d17_dossier.i6z	NDA208471-lixisenatide	320367-13-3	(4S)-5-[[2-[[(2S,3R)-1-[[(2S)-1-[[(2S,3R)-1-[[(2S)-1-[[(2S)-1-[[(2S)-1-[[(2S)-1-[[(2S)-6-amino-1-[[(2S)-5-amino-1-[[(2S)-1-[[(2S)-1-[[(2S)-1-[[(2S)-1-[[(2S)-1-[[(2S)-1-[[(2S)-1-[[(2S)-1-[[(2S)-1-[[(2S,3S)-1-[[(2S)-1-[[(2S)-1-[[(2S)-1-[[(2S)-6-amino-1-[[(2S)-4-amino-1-[[2-[[2-[(2S)-2-[[(2S)-1-[[(2S)-1-[[2-[[(2S)-1-[(2S)-2-[(2S)-2-[[(2S)-1-[[(2S)-6-amino-1-[[(2S)-6-amino-1-[[(2S)-6-amino-1-[[(2S)-6…	v2	NDA208471	ALIMENTARY TRACT AND METABOLISM	4104304f-2d53-4dc4-8ea5-99e489d0f966	d567a1db-118f-49c6-acba-40fcf78a0d17	46161383	4eee6cbb-7f25-48f8-912e-3d308f5c848b	Carcinogenicity	61280	carcinogenicity, other	1895	experimental study				{"AdministrativeData": {"Endpoint": {"code": "61280"}, "StudyResultType": {"code": "1895"}, "RobustStudy": false, "UsedForClassification": false, "UsedForMSDS": false}, "MaterialsAndMethods": {"TestMaterials": {"TestMaterialInformation": "7a31021f-0f54-4115-b16b-e08f1478d5e9/4104304f-2d53-4dc4-8ea5-99e489d0f966", "SpecificDetailsOnTestMaterialUsedForTheStudy": "#PPL-AVE100501A (until 31 Oct 2007)…	mouse	CD-1	subcutaneous	2 years	twice daily	None other:ug/kg/day, 40.0 other:ug/kg/day, 200.0 other:ug/kg/day, 1000.0 other:ug/kg/day																	Key Study Findings • There were no treatment-related effects on mortality. There were no noteworthy differences in deaths due to tumors or non-tumor causes between control and treated animals. • Treatment-related clinical signs included an increased incidence in distended abdomens for all treated groups and a slight increase in corneal opacity for high-dose males and females. • A dose-related inc…			Key Study Findings • There were no treatment-related effects on mortality. There were no noteworthy differences in deaths due to tumors or non-tumor causes between control and treated animals. • Treatment-related clinical signs included an increased incidence in distended abdomens for all treated groups and a slight increase in corneal opacity for high-dose males and females. • A dose-related inc…	4ec4d311-4c1f-408c-901a-4a85403512e4	FALSE	{'code': '61026', 'code (mapped)': 'histopathology: neoplastic'}	345
d567a1db-118f-49c6-acba-40fcf78a0d17_dossier.i6z	NDA208471-lixisenatide	320367-13-3	(4S)-5-[[2-[[(2S,3R)-1-[[(2S)-1-[[(2S,3R)-1-[[(2S)-1-[[(2S)-1-[[(2S)-1-[[(2S)-1-[[(2S)-6-amino-1-[[(2S)-5-amino-1-[[(2S)-1-[[(2S)-1-[[(2S)-1-[[(2S)-1-[[(2S)-1-[[(2S)-1-[[(2S)-1-[[(2S)-1-[[(2S)-1-[[(2S,3S)-1-[[(2S)-1-[[(2S)-1-[[(2S)-1-[[(2S)-6-amino-1-[[(2S)-4-amino-1-[[2-[[2-[(2S)-2-[[(2S)-1-[[(2S)-1-[[2-[[(2S)-1-[(2S)-2-[(2S)-2-[[(2S)-1-[[(2S)-6-amino-1-[[(2S)-6-amino-1-[[(2S)-6-amino-1-[[(2S)-6…	v2	NDA208471	ALIMENTARY TRACT AND METABOLISM	4104304f-2d53-4dc4-8ea5-99e489d0f966	d567a1db-118f-49c6-acba-40fcf78a0d17	46161383	4eee6cbb-7f25-48f8-912e-3d308f5c848b	Carcinogenicity	61280	carcinogenicity, other	1895	experimental study				{"AdministrativeData": {"Endpoint": {"code": "61280"}, "StudyResultType": {"code": "1895"}, "RobustStudy": false, "UsedForClassification": false, "UsedForMSDS": false}, "MaterialsAndMethods": {"TestMaterials": {"TestMaterialInformation": "7a31021f-0f54-4115-b16b-e08f1478d5e9/4104304f-2d53-4dc4-8ea5-99e489d0f966", "SpecificDetailsOnTestMaterialUsedForTheStudy": "#PPL-AVE100501A (until 31 Oct 2007)…	mouse	CD-1	subcutaneous	2 years	twice daily	None other:ug/kg/day, 40.0 other:ug/kg/day, 200.0 other:ug/kg/day, 1000.0 other:ug/kg/day																	Key Study Findings • There were no treatment-related effects on mortality. There were no noteworthy differences in deaths due to tumors or non-tumor causes between control and treated animals. • Treatment-related clinical signs included an increased incidence in distended abdomens for all treated groups and a slight increase in corneal opacity for high-dose males and females. • A dose-related inc…			Key Study Findings • There were no treatment-related effects on mortality. There were no noteworthy differences in deaths due to tumors or non-tumor causes between control and treated animals. • Treatment-related clinical signs included an increased incidence in distended abdomens for all treated groups and a slight increase in corneal opacity for high-dose males and females. • A dose-related inc…	5c0ddfa1-3e63-41e8-a69c-b8bd26c64bc0	FALSE	{'code': '61023', 'code (mapped)': 'gross pathology'}	345
d567a1db-118f-49c6-acba-40fcf78a0d17_dossier.i6z	NDA208471-lixisenatide	320367-13-3	(4S)-5-[[2-[[(2S,3R)-1-[[(2S)-1-[[(2S,3R)-1-[[(2S)-1-[[(2S)-1-[[(2S)-1-[[(2S)-1-[[(2S)-6-amino-1-[[(2S)-5-amino-1-[[(2S)-1-[[(2S)-1-[[(2S)-1-[[(2S)-1-[[(2S)-1-[[(2S)-1-[[(2S)-1-[[(2S)-1-[[(2S)-1-[[(2S,3S)-1-[[(2S)-1-[[(2S)-1-[[(2S)-1-[[(2S)-6-amino-1-[[(2S)-4-amino-1-[[2-[[2-[(2S)-2-[[(2S)-1-[[(2S)-1-[[2-[[(2S)-1-[(2S)-2-[(2S)-2-[[(2S)-1-[[(2S)-6-amino-1-[[(2S)-6-amino-1-[[(2S)-6-amino-1-[[(2S)-6…	v2	NDA208471	ALIMENTARY TRACT AND METABOLISM	4104304f-2d53-4dc4-8ea5-99e489d0f966	d567a1db-118f-49c6-acba-40fcf78a0d17	46161383	4eee6cbb-7f25-48f8-912e-3d308f5c848b	Carcinogenicity	61280	carcinogenicity, other	1895	experimental study				{"AdministrativeData": {"Endpoint": {"code": "61280"}, "StudyResultType": {"code": "1895"}, "RobustStudy": false, "UsedForClassification": false, "UsedForMSDS": false}, "MaterialsAndMethods": {"TestMaterials": {"TestMaterialInformation": "7a31021f-0f54-4115-b16b-e08f1478d5e9/4104304f-2d53-4dc4-8ea5-99e489d0f966", "SpecificDetailsOnTestMaterialUsedForTheStudy": "#PPL-AVE100501A (until 31 Oct 2007)…	mouse	CD-1	subcutaneous	2 years	twice daily	None other:ug/kg/day, 40.0 other:ug/kg/day, 200.0 other:ug/kg/day, 1000.0 other:ug/kg/day																	Key Study Findings • There were no treatment-related effects on mortality. There were no noteworthy differences in deaths due to tumors or non-tumor causes between control and treated animals. • Treatment-related clinical signs included an increased incidence in distended abdomens for all treated groups and a slight increase in corneal opacity for high-dose males and females. • A dose-related inc…			Key Study Findings • There were no treatment-related effects on mortality. There were no noteworthy differences in deaths due to tumors or non-tumor causes between control and treated animals. • Treatment-related clinical signs included an increased incidence in distended abdomens for all treated groups and a slight increase in corneal opacity for high-dose males and females. • A dose-related inc…	5cc3981d-48c2-4c29-945a-d0e7d8bb7903	FALSE	{'code': '61025', 'code (mapped)': 'histopathology: non-neoplastic'}	345
d567a1db-118f-49c6-acba-40fcf78a0d17_dossier.i6z	NDA208471-lixisenatide	320367-13-3	(4S)-5-[[2-[[(2S,3R)-1-[[(2S)-1-[[(2S,3R)-1-[[(2S)-1-[[(2S)-1-[[(2S)-1-[[(2S)-1-[[(2S)-6-amino-1-[[(2S)-5-amino-1-[[(2S)-1-[[(2S)-1-[[(2S)-1-[[(2S)-1-[[(2S)-1-[[(2S)-1-[[(2S)-1-[[(2S)-1-[[(2S)-1-[[(2S,3S)-1-[[(2S)-1-[[(2S)-1-[[(2S)-1-[[(2S)-6-amino-1-[[(2S)-4-amino-1-[[2-[[2-[(2S)-2-[[(2S)-1-[[(2S)-1-[[2-[[(2S)-1-[(2S)-2-[(2S)-2-[[(2S)-1-[[(2S)-6-amino-1-[[(2S)-6-amino-1-[[(2S)-6-amino-1-[[(2S)-6…	v2	NDA208471	ALIMENTARY TRACT AND METABOLISM	4104304f-2d53-4dc4-8ea5-99e489d0f966	d567a1db-118f-49c6-acba-40fcf78a0d17	46161383	4eee6cbb-7f25-48f8-912e-3d308f5c848b	Carcinogenicity	61280	carcinogenicity, other	1895	experimental study				{"AdministrativeData": {"Endpoint": {"code": "61280"}, "StudyResultType": {"code": "1895"}, "RobustStudy": false, "UsedForClassification": false, "UsedForMSDS": false}, "MaterialsAndMethods": {"TestMaterials": {"TestMaterialInformation": "7a31021f-0f54-4115-b16b-e08f1478d5e9/4104304f-2d53-4dc4-8ea5-99e489d0f966", "SpecificDetailsOnTestMaterialUsedForTheStudy": "#PPL-AVE100501A (until 31 Oct 2007)…	mouse	CD-1	subcutaneous	2 years	twice daily	None other:ug/kg/day, 40.0 other:ug/kg/day, 200.0 other:ug/kg/day, 1000.0 other:ug/kg/day																	Key Study Findings • There were no treatment-related effects on mortality. There were no noteworthy differences in deaths due to tumors or non-tumor causes between control and treated animals. • Treatment-related clinical signs included an increased incidence in distended abdomens for all treated groups and a slight increase in corneal opacity for high-dose males and females. • A dose-related inc…			Key Study Findings • There were no treatment-related effects on mortality. There were no noteworthy differences in deaths due to tumors or non-tumor causes between control and treated animals. • Treatment-related clinical signs included an increased incidence in distended abdomens for all treated groups and a slight increase in corneal opacity for high-dose males and females. • A dose-related inc…	5e82d98f-228b-4e29-909a-0a06034c981b	FALSE	{'code': '61025', 'code (mapped)': 'histopathology: non-neoplastic'}	345
d567a1db-118f-49c6-acba-40fcf78a0d17_dossier.i6z	NDA208471-lixisenatide	320367-13-3	(4S)-5-[[2-[[(2S,3R)-1-[[(2S)-1-[[(2S,3R)-1-[[(2S)-1-[[(2S)-1-[[(2S)-1-[[(2S)-1-[[(2S)-6-amino-1-[[(2S)-5-amino-1-[[(2S)-1-[[(2S)-1-[[(2S)-1-[[(2S)-1-[[(2S)-1-[[(2S)-1-[[(2S)-1-[[(2S)-1-[[(2S)-1-[[(2S,3S)-1-[[(2S)-1-[[(2S)-1-[[(2S)-1-[[(2S)-6-amino-1-[[(2S)-4-amino-1-[[2-[[2-[(2S)-2-[[(2S)-1-[[(2S)-1-[[2-[[(2S)-1-[(2S)-2-[(2S)-2-[[(2S)-1-[[(2S)-6-amino-1-[[(2S)-6-amino-1-[[(2S)-6-amino-1-[[(2S)-6…	v2	NDA208471	ALIMENTARY TRACT AND METABOLISM	4104304f-2d53-4dc4-8ea5-99e489d0f966	d567a1db-118f-49c6-acba-40fcf78a0d17	46161383	4eee6cbb-7f25-48f8-912e-3d308f5c848b	Carcinogenicity	61280	carcinogenicity, other	1895	experimental study				{"AdministrativeData": {"Endpoint": {"code": "61280"}, "StudyResultType": {"code": "1895"}, "RobustStudy": false, "UsedForClassification": false, "UsedForMSDS": false}, "MaterialsAndMethods": {"TestMaterials": {"TestMaterialInformation": "7a31021f-0f54-4115-b16b-e08f1478d5e9/4104304f-2d53-4dc4-8ea5-99e489d0f966", "SpecificDetailsOnTestMaterialUsedForTheStudy": "#PPL-AVE100501A (until 31 Oct 2007)…	mouse	CD-1	subcutaneous	2 years	twice daily	None other:ug/kg/day, 40.0 other:ug/kg/day, 200.0 other:ug/kg/day, 1000.0 other:ug/kg/day																	Key Study Findings • There were no treatment-related effects on mortality. There were no noteworthy differences in deaths due to tumors or non-tumor causes between control and treated animals. • Treatment-related clinical signs included an increased incidence in distended abdomens for all treated groups and a slight increase in corneal opacity for high-dose males and females. • A dose-related inc…			Key Study Findings • There were no treatment-related effects on mortality. There were no noteworthy differences in deaths due to tumors or non-tumor causes between control and treated animals. • Treatment-related clinical signs included an increased incidence in distended abdomens for all treated groups and a slight increase in corneal opacity for high-dose males and females. • A dose-related inc…	6ef244d6-89c4-4636-a76d-82112c983364	FALSE	{'code': '61025', 'code (mapped)': 'histopathology: non-neoplastic'}	345
d567a1db-118f-49c6-acba-40fcf78a0d17_dossier.i6z	NDA208471-lixisenatide	320367-13-3	(4S)-5-[[2-[[(2S,3R)-1-[[(2S)-1-[[(2S,3R)-1-[[(2S)-1-[[(2S)-1-[[(2S)-1-[[(2S)-1-[[(2S)-6-amino-1-[[(2S)-5-amino-1-[[(2S)-1-[[(2S)-1-[[(2S)-1-[[(2S)-1-[[(2S)-1-[[(2S)-1-[[(2S)-1-[[(2S)-1-[[(2S)-1-[[(2S,3S)-1-[[(2S)-1-[[(2S)-1-[[(2S)-1-[[(2S)-6-amino-1-[[(2S)-4-amino-1-[[2-[[2-[(2S)-2-[[(2S)-1-[[(2S)-1-[[2-[[(2S)-1-[(2S)-2-[(2S)-2-[[(2S)-1-[[(2S)-6-amino-1-[[(2S)-6-amino-1-[[(2S)-6-amino-1-[[(2S)-6…	v2	NDA208471	ALIMENTARY TRACT AND METABOLISM	4104304f-2d53-4dc4-8ea5-99e489d0f966	d567a1db-118f-49c6-acba-40fcf78a0d17	46161383	4eee6cbb-7f25-48f8-912e-3d308f5c848b	Carcinogenicity	61280	carcinogenicity, other	1895	experimental study				{"AdministrativeData": {"Endpoint": {"code": "61280"}, "StudyResultType": {"code": "1895"}, "RobustStudy": false, "UsedForClassification": false, "UsedForMSDS": false}, "MaterialsAndMethods": {"TestMaterials": {"TestMaterialInformation": "7a31021f-0f54-4115-b16b-e08f1478d5e9/4104304f-2d53-4dc4-8ea5-99e489d0f966", "SpecificDetailsOnTestMaterialUsedForTheStudy": "#PPL-AVE100501A (until 31 Oct 2007)…	mouse	CD-1	subcutaneous	2 years	twice daily	None other:ug/kg/day, 40.0 other:ug/kg/day, 200.0 other:ug/kg/day, 1000.0 other:ug/kg/day																	Key Study Findings • There were no treatment-related effects on mortality. There were no noteworthy differences in deaths due to tumors or non-tumor causes between control and treated animals. • Treatment-related clinical signs included an increased incidence in distended abdomens for all treated groups and a slight increase in corneal opacity for high-dose males and females. • A dose-related inc…			Key Study Findings • There were no treatment-related effects on mortality. There were no noteworthy differences in deaths due to tumors or non-tumor causes between control and treated animals. • Treatment-related clinical signs included an increased incidence in distended abdomens for all treated groups and a slight increase in corneal opacity for high-dose males and females. • A dose-related inc…	7318bb3d-b5de-4a3f-b085-4ee654a8ba77	FALSE	{'code': '61025', 'code (mapped)': 'histopathology: non-neoplastic'}	345
d567a1db-118f-49c6-acba-40fcf78a0d17_dossier.i6z	NDA208471-lixisenatide	320367-13-3	(4S)-5-[[2-[[(2S,3R)-1-[[(2S)-1-[[(2S,3R)-1-[[(2S)-1-[[(2S)-1-[[(2S)-1-[[(2S)-1-[[(2S)-6-amino-1-[[(2S)-5-amino-1-[[(2S)-1-[[(2S)-1-[[(2S)-1-[[(2S)-1-[[(2S)-1-[[(2S)-1-[[(2S)-1-[[(2S)-1-[[(2S)-1-[[(2S,3S)-1-[[(2S)-1-[[(2S)-1-[[(2S)-1-[[(2S)-6-amino-1-[[(2S)-4-amino-1-[[2-[[2-[(2S)-2-[[(2S)-1-[[(2S)-1-[[2-[[(2S)-1-[(2S)-2-[(2S)-2-[[(2S)-1-[[(2S)-6-amino-1-[[(2S)-6-amino-1-[[(2S)-6-amino-1-[[(2S)-6…	v2	NDA208471	ALIMENTARY TRACT AND METABOLISM	4104304f-2d53-4dc4-8ea5-99e489d0f966	d567a1db-118f-49c6-acba-40fcf78a0d17	46161383	4eee6cbb-7f25-48f8-912e-3d308f5c848b	Carcinogenicity	61280	carcinogenicity, other	1895	experimental study				{"AdministrativeData": {"Endpoint": {"code": "61280"}, "StudyResultType": {"code": "1895"}, "RobustStudy": false, "UsedForClassification": false, "UsedForMSDS": false}, "MaterialsAndMethods": {"TestMaterials": {"TestMaterialInformation": "7a31021f-0f54-4115-b16b-e08f1478d5e9/4104304f-2d53-4dc4-8ea5-99e489d0f966", "SpecificDetailsOnTestMaterialUsedForTheStudy": "#PPL-AVE100501A (until 31 Oct 2007)…	mouse	CD-1	subcutaneous	2 years	twice daily	None other:ug/kg/day, 40.0 other:ug/kg/day, 200.0 other:ug/kg/day, 1000.0 other:ug/kg/day																	Key Study Findings • There were no treatment-related effects on mortality. There were no noteworthy differences in deaths due to tumors or non-tumor causes between control and treated animals. • Treatment-related clinical signs included an increased incidence in distended abdomens for all treated groups and a slight increase in corneal opacity for high-dose males and females. • A dose-related inc…			Key Study Findings • There were no treatment-related effects on mortality. There were no noteworthy differences in deaths due to tumors or non-tumor causes between control and treated animals. • Treatment-related clinical signs included an increased incidence in distended abdomens for all treated groups and a slight increase in corneal opacity for high-dose males and females. • A dose-related inc…	869f7828-9be8-4fd8-98e5-6f291c071c06	FALSE	{'code': '61012', 'code (mapped)': 'body weight and weight gain'}	345
d567a1db-118f-49c6-acba-40fcf78a0d17_dossier.i6z	NDA208471-lixisenatide	320367-13-3	(4S)-5-[[2-[[(2S,3R)-1-[[(2S)-1-[[(2S,3R)-1-[[(2S)-1-[[(2S)-1-[[(2S)-1-[[(2S)-1-[[(2S)-6-amino-1-[[(2S)-5-amino-1-[[(2S)-1-[[(2S)-1-[[(2S)-1-[[(2S)-1-[[(2S)-1-[[(2S)-1-[[(2S)-1-[[(2S)-1-[[(2S)-1-[[(2S,3S)-1-[[(2S)-1-[[(2S)-1-[[(2S)-1-[[(2S)-6-amino-1-[[(2S)-4-amino-1-[[2-[[2-[(2S)-2-[[(2S)-1-[[(2S)-1-[[2-[[(2S)-1-[(2S)-2-[(2S)-2-[[(2S)-1-[[(2S)-6-amino-1-[[(2S)-6-amino-1-[[(2S)-6-amino-1-[[(2S)-6…	v2	NDA208471	ALIMENTARY TRACT AND METABOLISM	4104304f-2d53-4dc4-8ea5-99e489d0f966	d567a1db-118f-49c6-acba-40fcf78a0d17	46161383	4eee6cbb-7f25-48f8-912e-3d308f5c848b	Carcinogenicity	61280	carcinogenicity, other	1895	experimental study				{"AdministrativeData": {"Endpoint": {"code": "61280"}, "StudyResultType": {"code": "1895"}, "RobustStudy": false, "UsedForClassification": false, "UsedForMSDS": false}, "MaterialsAndMethods": {"TestMaterials": {"TestMaterialInformation": "7a31021f-0f54-4115-b16b-e08f1478d5e9/4104304f-2d53-4dc4-8ea5-99e489d0f966", "SpecificDetailsOnTestMaterialUsedForTheStudy": "#PPL-AVE100501A (until 31 Oct 2007)…	mouse	CD-1	subcutaneous	2 years	twice daily	None other:ug/kg/day, 40.0 other:ug/kg/day, 200.0 other:ug/kg/day, 1000.0 other:ug/kg/day																	Key Study Findings • There were no treatment-related effects on mortality. There were no noteworthy differences in deaths due to tumors or non-tumor causes between control and treated animals. • Treatment-related clinical signs included an increased incidence in distended abdomens for all treated groups and a slight increase in corneal opacity for high-dose males and females. • A dose-related inc…			Key Study Findings • There were no treatment-related effects on mortality. There were no noteworthy differences in deaths due to tumors or non-tumor causes between control and treated animals. • Treatment-related clinical signs included an increased incidence in distended abdomens for all treated groups and a slight increase in corneal opacity for high-dose males and females. • A dose-related inc…	b0fed20e-3ec7-42c4-8d9b-ceffc50ba463	FALSE	{'code': '1342', 'code (mapped)': 'other:', 'other': 'Not reported by medical writer'}	1109
d567a1db-118f-49c6-acba-40fcf78a0d17_dossier.i6z	NDA208471-lixisenatide	320367-13-3	(4S)-5-[[2-[[(2S,3R)-1-[[(2S)-1-[[(2S,3R)-1-[[(2S)-1-[[(2S)-1-[[(2S)-1-[[(2S)-1-[[(2S)-6-amino-1-[[(2S)-5-amino-1-[[(2S)-1-[[(2S)-1-[[(2S)-1-[[(2S)-1-[[(2S)-1-[[(2S)-1-[[(2S)-1-[[(2S)-1-[[(2S)-1-[[(2S,3S)-1-[[(2S)-1-[[(2S)-1-[[(2S)-1-[[(2S)-6-amino-1-[[(2S)-4-amino-1-[[2-[[2-[(2S)-2-[[(2S)-1-[[(2S)-1-[[2-[[(2S)-1-[(2S)-2-[(2S)-2-[[(2S)-1-[[(2S)-6-amino-1-[[(2S)-6-amino-1-[[(2S)-6-amino-1-[[(2S)-6…	v2	NDA208471	ALIMENTARY TRACT AND METABOLISM	4104304f-2d53-4dc4-8ea5-99e489d0f966	d567a1db-118f-49c6-acba-40fcf78a0d17	46161383	4eee6cbb-7f25-48f8-912e-3d308f5c848b	Carcinogenicity	61280	carcinogenicity, other	1895	experimental study				{"AdministrativeData": {"Endpoint": {"code": "61280"}, "StudyResultType": {"code": "1895"}, "RobustStudy": false, "UsedForClassification": false, "UsedForMSDS": false}, "MaterialsAndMethods": {"TestMaterials": {"TestMaterialInformation": "7a31021f-0f54-4115-b16b-e08f1478d5e9/4104304f-2d53-4dc4-8ea5-99e489d0f966", "SpecificDetailsOnTestMaterialUsedForTheStudy": "#PPL-AVE100501A (until 31 Oct 2007)…	mouse	CD-1	subcutaneous	2 years	twice daily	None other:ug/kg/day, 40.0 other:ug/kg/day, 200.0 other:ug/kg/day, 1000.0 other:ug/kg/day																	Key Study Findings • There were no treatment-related effects on mortality. There were no noteworthy differences in deaths due to tumors or non-tumor causes between control and treated animals. • Treatment-related clinical signs included an increased incidence in distended abdomens for all treated groups and a slight increase in corneal opacity for high-dose males and females. • A dose-related inc…			Key Study Findings • There were no treatment-related effects on mortality. There were no noteworthy differences in deaths due to tumors or non-tumor causes between control and treated animals. • Treatment-related clinical signs included an increased incidence in distended abdomens for all treated groups and a slight increase in corneal opacity for high-dose males and females. • A dose-related inc…	b190f618-27c3-4cfc-9326-822331e17615	FALSE	{'code': '61026', 'code (mapped)': 'histopathology: neoplastic'}	345
d567a1db-118f-49c6-acba-40fcf78a0d17_dossier.i6z	NDA208471-lixisenatide	320367-13-3	(4S)-5-[[2-[[(2S,3R)-1-[[(2S)-1-[[(2S,3R)-1-[[(2S)-1-[[(2S)-1-[[(2S)-1-[[(2S)-1-[[(2S)-6-amino-1-[[(2S)-5-amino-1-[[(2S)-1-[[(2S)-1-[[(2S)-1-[[(2S)-1-[[(2S)-1-[[(2S)-1-[[(2S)-1-[[(2S)-1-[[(2S)-1-[[(2S,3S)-1-[[(2S)-1-[[(2S)-1-[[(2S)-1-[[(2S)-6-amino-1-[[(2S)-4-amino-1-[[2-[[2-[(2S)-2-[[(2S)-1-[[(2S)-1-[[2-[[(2S)-1-[(2S)-2-[(2S)-2-[[(2S)-1-[[(2S)-6-amino-1-[[(2S)-6-amino-1-[[(2S)-6-amino-1-[[(2S)-6…	v2	NDA208471	ALIMENTARY TRACT AND METABOLISM	4104304f-2d53-4dc4-8ea5-99e489d0f966	d567a1db-118f-49c6-acba-40fcf78a0d17	46161383	4eee6cbb-7f25-48f8-912e-3d308f5c848b	Carcinogenicity	61280	carcinogenicity, other	1895	experimental study				{"AdministrativeData": {"Endpoint": {"code": "61280"}, "StudyResultType": {"code": "1895"}, "RobustStudy": false, "UsedForClassification": false, "UsedForMSDS": false}, "MaterialsAndMethods": {"TestMaterials": {"TestMaterialInformation": "7a31021f-0f54-4115-b16b-e08f1478d5e9/4104304f-2d53-4dc4-8ea5-99e489d0f966", "SpecificDetailsOnTestMaterialUsedForTheStudy": "#PPL-AVE100501A (until 31 Oct 2007)…	mouse	CD-1	subcutaneous	2 years	twice daily	None other:ug/kg/day, 40.0 other:ug/kg/day, 200.0 other:ug/kg/day, 1000.0 other:ug/kg/day																	Key Study Findings • There were no treatment-related effects on mortality. There were no noteworthy differences in deaths due to tumors or non-tumor causes between control and treated animals. • Treatment-related clinical signs included an increased incidence in distended abdomens for all treated groups and a slight increase in corneal opacity for high-dose males and females. • A dose-related inc…			Key Study Findings • There were no treatment-related effects on mortality. There were no noteworthy differences in deaths due to tumors or non-tumor causes between control and treated animals. • Treatment-related clinical signs included an increased incidence in distended abdomens for all treated groups and a slight increase in corneal opacity for high-dose males and females. • A dose-related inc…	b190f618-27c3-4cfc-9326-822331e17615	FALSE	{'code': '61026', 'code (mapped)': 'histopathology: neoplastic'}	345
d567a1db-118f-49c6-acba-40fcf78a0d17_dossier.i6z	NDA208471-lixisenatide	320367-13-3	(4S)-5-[[2-[[(2S,3R)-1-[[(2S)-1-[[(2S,3R)-1-[[(2S)-1-[[(2S)-1-[[(2S)-1-[[(2S)-1-[[(2S)-6-amino-1-[[(2S)-5-amino-1-[[(2S)-1-[[(2S)-1-[[(2S)-1-[[(2S)-1-[[(2S)-1-[[(2S)-1-[[(2S)-1-[[(2S)-1-[[(2S)-1-[[(2S,3S)-1-[[(2S)-1-[[(2S)-1-[[(2S)-1-[[(2S)-6-amino-1-[[(2S)-4-amino-1-[[2-[[2-[(2S)-2-[[(2S)-1-[[(2S)-1-[[2-[[(2S)-1-[(2S)-2-[(2S)-2-[[(2S)-1-[[(2S)-6-amino-1-[[(2S)-6-amino-1-[[(2S)-6-amino-1-[[(2S)-6…	v2	NDA208471	ALIMENTARY TRACT AND METABOLISM	4104304f-2d53-4dc4-8ea5-99e489d0f966	d567a1db-118f-49c6-acba-40fcf78a0d17	46161383	4eee6cbb-7f25-48f8-912e-3d308f5c848b	Carcinogenicity	61280	carcinogenicity, other	1895	experimental study				{"AdministrativeData": {"Endpoint": {"code": "61280"}, "StudyResultType": {"code": "1895"}, "RobustStudy": false, "UsedForClassification": false, "UsedForMSDS": false}, "MaterialsAndMethods": {"TestMaterials": {"TestMaterialInformation": "7a31021f-0f54-4115-b16b-e08f1478d5e9/4104304f-2d53-4dc4-8ea5-99e489d0f966", "SpecificDetailsOnTestMaterialUsedForTheStudy": "#PPL-AVE100501A (until 31 Oct 2007)…	mouse	CD-1	subcutaneous	2 years	twice daily	None other:ug/kg/day, 40.0 other:ug/kg/day, 200.0 other:ug/kg/day, 1000.0 other:ug/kg/day																	Key Study Findings • There were no treatment-related effects on mortality. There were no noteworthy differences in deaths due to tumors or non-tumor causes between control and treated animals. • Treatment-related clinical signs included an increased incidence in distended abdomens for all treated groups and a slight increase in corneal opacity for high-dose males and females. • A dose-related inc…			Key Study Findings • There were no treatment-related effects on mortality. There were no noteworthy differences in deaths due to tumors or non-tumor causes between control and treated animals. • Treatment-related clinical signs included an increased incidence in distended abdomens for all treated groups and a slight increase in corneal opacity for high-dose males and females. • A dose-related inc…	b3c0dd9d-468b-4faa-a71a-32ef12c16778	FALSE	{'code': '61011', 'code (mapped)': 'clinical signs'}	345
d567a1db-118f-49c6-acba-40fcf78a0d17_dossier.i6z	NDA208471-lixisenatide	320367-13-3	(4S)-5-[[2-[[(2S,3R)-1-[[(2S)-1-[[(2S,3R)-1-[[(2S)-1-[[(2S)-1-[[(2S)-1-[[(2S)-1-[[(2S)-6-amino-1-[[(2S)-5-amino-1-[[(2S)-1-[[(2S)-1-[[(2S)-1-[[(2S)-1-[[(2S)-1-[[(2S)-1-[[(2S)-1-[[(2S)-1-[[(2S)-1-[[(2S,3S)-1-[[(2S)-1-[[(2S)-1-[[(2S)-1-[[(2S)-6-amino-1-[[(2S)-4-amino-1-[[2-[[2-[(2S)-2-[[(2S)-1-[[(2S)-1-[[2-[[(2S)-1-[(2S)-2-[(2S)-2-[[(2S)-1-[[(2S)-6-amino-1-[[(2S)-6-amino-1-[[(2S)-6-amino-1-[[(2S)-6…	v2	NDA208471	ALIMENTARY TRACT AND METABOLISM	4104304f-2d53-4dc4-8ea5-99e489d0f966	d567a1db-118f-49c6-acba-40fcf78a0d17	46161383	4eee6cbb-7f25-48f8-912e-3d308f5c848b	Carcinogenicity	61280	carcinogenicity, other	1895	experimental study				{"AdministrativeData": {"Endpoint": {"code": "61280"}, "StudyResultType": {"code": "1895"}, "RobustStudy": false, "UsedForClassification": false, "UsedForMSDS": false}, "MaterialsAndMethods": {"TestMaterials": {"TestMaterialInformation": "7a31021f-0f54-4115-b16b-e08f1478d5e9/4104304f-2d53-4dc4-8ea5-99e489d0f966", "SpecificDetailsOnTestMaterialUsedForTheStudy": "#PPL-AVE100501A (until 31 Oct 2007)…	mouse	CD-1	subcutaneous	2 years	twice daily	None other:ug/kg/day, 40.0 other:ug/kg/day, 200.0 other:ug/kg/day, 1000.0 other:ug/kg/day																	Key Study Findings • There were no treatment-related effects on mortality. There were no noteworthy differences in deaths due to tumors or non-tumor causes between control and treated animals. • Treatment-related clinical signs included an increased incidence in distended abdomens for all treated groups and a slight increase in corneal opacity for high-dose males and females. • A dose-related inc…			Key Study Findings • There were no treatment-related effects on mortality. There were no noteworthy differences in deaths due to tumors or non-tumor causes between control and treated animals. • Treatment-related clinical signs included an increased incidence in distended abdomens for all treated groups and a slight increase in corneal opacity for high-dose males and females. • A dose-related inc…	b51800a8-bc3a-44a0-9359-bcf716293b22	FALSE	{'code': '61025', 'code (mapped)': 'histopathology: non-neoplastic'}	345
d567a1db-118f-49c6-acba-40fcf78a0d17_dossier.i6z	NDA208471-lixisenatide	320367-13-3	(4S)-5-[[2-[[(2S,3R)-1-[[(2S)-1-[[(2S,3R)-1-[[(2S)-1-[[(2S)-1-[[(2S)-1-[[(2S)-1-[[(2S)-6-amino-1-[[(2S)-5-amino-1-[[(2S)-1-[[(2S)-1-[[(2S)-1-[[(2S)-1-[[(2S)-1-[[(2S)-1-[[(2S)-1-[[(2S)-1-[[(2S)-1-[[(2S,3S)-1-[[(2S)-1-[[(2S)-1-[[(2S)-1-[[(2S)-6-amino-1-[[(2S)-4-amino-1-[[2-[[2-[(2S)-2-[[(2S)-1-[[(2S)-1-[[2-[[(2S)-1-[(2S)-2-[(2S)-2-[[(2S)-1-[[(2S)-6-amino-1-[[(2S)-6-amino-1-[[(2S)-6-amino-1-[[(2S)-6…	v2	NDA208471	ALIMENTARY TRACT AND METABOLISM	4104304f-2d53-4dc4-8ea5-99e489d0f966	d567a1db-118f-49c6-acba-40fcf78a0d17	46161383	4eee6cbb-7f25-48f8-912e-3d308f5c848b	Carcinogenicity	61280	carcinogenicity, other	1895	experimental study				{"AdministrativeData": {"Endpoint": {"code": "61280"}, "StudyResultType": {"code": "1895"}, "RobustStudy": false, "UsedForClassification": false, "UsedForMSDS": false}, "MaterialsAndMethods": {"TestMaterials": {"TestMaterialInformation": "7a31021f-0f54-4115-b16b-e08f1478d5e9/4104304f-2d53-4dc4-8ea5-99e489d0f966", "SpecificDetailsOnTestMaterialUsedForTheStudy": "#PPL-AVE100501A (until 31 Oct 2007)…	mouse	CD-1	subcutaneous	2 years	twice daily	None other:ug/kg/day, 40.0 other:ug/kg/day, 200.0 other:ug/kg/day, 1000.0 other:ug/kg/day																	Key Study Findings • There were no treatment-related effects on mortality. There were no noteworthy differences in deaths due to tumors or non-tumor causes between control and treated animals. • Treatment-related clinical signs included an increased incidence in distended abdomens for all treated groups and a slight increase in corneal opacity for high-dose males and females. • A dose-related inc…			Key Study Findings • There were no treatment-related effects on mortality. There were no noteworthy differences in deaths due to tumors or non-tumor causes between control and treated animals. • Treatment-related clinical signs included an increased incidence in distended abdomens for all treated groups and a slight increase in corneal opacity for high-dose males and females. • A dose-related inc…	bf7f41cf-fd6f-4ad8-a712-1d981659e38a	FALSE	{'code': '61026', 'code (mapped)': 'histopathology: neoplastic'}	345
d567a1db-118f-49c6-acba-40fcf78a0d17_dossier.i6z	NDA208471-lixisenatide	320367-13-3	(4S)-5-[[2-[[(2S,3R)-1-[[(2S)-1-[[(2S,3R)-1-[[(2S)-1-[[(2S)-1-[[(2S)-1-[[(2S)-1-[[(2S)-6-amino-1-[[(2S)-5-amino-1-[[(2S)-1-[[(2S)-1-[[(2S)-1-[[(2S)-1-[[(2S)-1-[[(2S)-1-[[(2S)-1-[[(2S)-1-[[(2S)-1-[[(2S,3S)-1-[[(2S)-1-[[(2S)-1-[[(2S)-1-[[(2S)-6-amino-1-[[(2S)-4-amino-1-[[2-[[2-[(2S)-2-[[(2S)-1-[[(2S)-1-[[2-[[(2S)-1-[(2S)-2-[(2S)-2-[[(2S)-1-[[(2S)-6-amino-1-[[(2S)-6-amino-1-[[(2S)-6-amino-1-[[(2S)-6…	v2	NDA208471	ALIMENTARY TRACT AND METABOLISM	4104304f-2d53-4dc4-8ea5-99e489d0f966	d567a1db-118f-49c6-acba-40fcf78a0d17	46161383	4eee6cbb-7f25-48f8-912e-3d308f5c848b	Carcinogenicity	61280	carcinogenicity, other	1895	experimental study				{"AdministrativeData": {"Endpoint": {"code": "61280"}, "StudyResultType": {"code": "1895"}, "RobustStudy": false, "UsedForClassification": false, "UsedForMSDS": false}, "MaterialsAndMethods": {"TestMaterials": {"TestMaterialInformation": "7a31021f-0f54-4115-b16b-e08f1478d5e9/4104304f-2d53-4dc4-8ea5-99e489d0f966", "SpecificDetailsOnTestMaterialUsedForTheStudy": "#PPL-AVE100501A (until 31 Oct 2007)…	mouse	CD-1	subcutaneous	2 years	twice daily	None other:ug/kg/day, 40.0 other:ug/kg/day, 200.0 other:ug/kg/day, 1000.0 other:ug/kg/day																	Key Study Findings • There were no treatment-related effects on mortality. There were no noteworthy differences in deaths due to tumors or non-tumor causes between control and treated animals. • Treatment-related clinical signs included an increased incidence in distended abdomens for all treated groups and a slight increase in corneal opacity for high-dose males and females. • A dose-related inc…			Key Study Findings • There were no treatment-related effects on mortality. There were no noteworthy differences in deaths due to tumors or non-tumor causes between control and treated animals. • Treatment-related clinical signs included an increased incidence in distended abdomens for all treated groups and a slight increase in corneal opacity for high-dose males and females. • A dose-related inc…	bf7f41cf-fd6f-4ad8-a712-1d981659e38a	FALSE	{'code': '61026', 'code (mapped)': 'histopathology: neoplastic'}	345
d567a1db-118f-49c6-acba-40fcf78a0d17_dossier.i6z	NDA208471-lixisenatide	320367-13-3	(4S)-5-[[2-[[(2S,3R)-1-[[(2S)-1-[[(2S,3R)-1-[[(2S)-1-[[(2S)-1-[[(2S)-1-[[(2S)-1-[[(2S)-6-amino-1-[[(2S)-5-amino-1-[[(2S)-1-[[(2S)-1-[[(2S)-1-[[(2S)-1-[[(2S)-1-[[(2S)-1-[[(2S)-1-[[(2S)-1-[[(2S)-1-[[(2S,3S)-1-[[(2S)-1-[[(2S)-1-[[(2S)-1-[[(2S)-6-amino-1-[[(2S)-4-amino-1-[[2-[[2-[(2S)-2-[[(2S)-1-[[(2S)-1-[[2-[[(2S)-1-[(2S)-2-[(2S)-2-[[(2S)-1-[[(2S)-6-amino-1-[[(2S)-6-amino-1-[[(2S)-6-amino-1-[[(2S)-6…	v2	NDA208471	ALIMENTARY TRACT AND METABOLISM	4104304f-2d53-4dc4-8ea5-99e489d0f966	d567a1db-118f-49c6-acba-40fcf78a0d17	46161383	4eee6cbb-7f25-48f8-912e-3d308f5c848b	Carcinogenicity	61280	carcinogenicity, other	1895	experimental study				{"AdministrativeData": {"Endpoint": {"code": "61280"}, "StudyResultType": {"code": "1895"}, "RobustStudy": false, "UsedForClassification": false, "UsedForMSDS": false}, "MaterialsAndMethods": {"TestMaterials": {"TestMaterialInformation": "7a31021f-0f54-4115-b16b-e08f1478d5e9/4104304f-2d53-4dc4-8ea5-99e489d0f966", "SpecificDetailsOnTestMaterialUsedForTheStudy": "#PPL-AVE100501A (until 31 Oct 2007)…	mouse	CD-1	subcutaneous	2 years	twice daily	None other:ug/kg/day, 40.0 other:ug/kg/day, 200.0 other:ug/kg/day, 1000.0 other:ug/kg/day																	Key Study Findings • There were no treatment-related effects on mortality. There were no noteworthy differences in deaths due to tumors or non-tumor causes between control and treated animals. • Treatment-related clinical signs included an increased incidence in distended abdomens for all treated groups and a slight increase in corneal opacity for high-dose males and females. • A dose-related inc…			Key Study Findings • There were no treatment-related effects on mortality. There were no noteworthy differences in deaths due to tumors or non-tumor causes between control and treated animals. • Treatment-related clinical signs included an increased incidence in distended abdomens for all treated groups and a slight increase in corneal opacity for high-dose males and females. • A dose-related inc…	c54a6051-eadb-4316-bfd3-738381f0c4bc	FALSE	{'code': '2135', 'code (mapped)': 'mortality'}	1130
d567a1db-118f-49c6-acba-40fcf78a0d17_dossier.i6z	NDA208471-lixisenatide	320367-13-3	(4S)-5-[[2-[[(2S,3R)-1-[[(2S)-1-[[(2S,3R)-1-[[(2S)-1-[[(2S)-1-[[(2S)-1-[[(2S)-1-[[(2S)-6-amino-1-[[(2S)-5-amino-1-[[(2S)-1-[[(2S)-1-[[(2S)-1-[[(2S)-1-[[(2S)-1-[[(2S)-1-[[(2S)-1-[[(2S)-1-[[(2S)-1-[[(2S,3S)-1-[[(2S)-1-[[(2S)-1-[[(2S)-1-[[(2S)-6-amino-1-[[(2S)-4-amino-1-[[2-[[2-[(2S)-2-[[(2S)-1-[[(2S)-1-[[2-[[(2S)-1-[(2S)-2-[(2S)-2-[[(2S)-1-[[(2S)-6-amino-1-[[(2S)-6-amino-1-[[(2S)-6-amino-1-[[(2S)-6…	v2	NDA208471	ALIMENTARY TRACT AND METABOLISM	4104304f-2d53-4dc4-8ea5-99e489d0f966	d567a1db-118f-49c6-acba-40fcf78a0d17	46161383	4eee6cbb-7f25-48f8-912e-3d308f5c848b	Carcinogenicity	61280	carcinogenicity, other	1895	experimental study				{"AdministrativeData": {"Endpoint": {"code": "61280"}, "StudyResultType": {"code": "1895"}, "RobustStudy": false, "UsedForClassification": false, "UsedForMSDS": false}, "MaterialsAndMethods": {"TestMaterials": {"TestMaterialInformation": "7a31021f-0f54-4115-b16b-e08f1478d5e9/4104304f-2d53-4dc4-8ea5-99e489d0f966", "SpecificDetailsOnTestMaterialUsedForTheStudy": "#PPL-AVE100501A (until 31 Oct 2007)…	mouse	CD-1	subcutaneous	2 years	twice daily	None other:ug/kg/day, 40.0 other:ug/kg/day, 200.0 other:ug/kg/day, 1000.0 other:ug/kg/day																	Key Study Findings • There were no treatment-related effects on mortality. There were no noteworthy differences in deaths due to tumors or non-tumor causes between control and treated animals. • Treatment-related clinical signs included an increased incidence in distended abdomens for all treated groups and a slight increase in corneal opacity for high-dose males and females. • A dose-related inc…			Key Study Findings • There were no treatment-related effects on mortality. There were no noteworthy differences in deaths due to tumors or non-tumor causes between control and treated animals. • Treatment-related clinical signs included an increased incidence in distended abdomens for all treated groups and a slight increase in corneal opacity for high-dose males and females. • A dose-related inc…	e06e5b73-d6be-4368-8aad-2f6c03da6c3b	FALSE	{'code': '61011', 'code (mapped)': 'clinical signs'}	345
d567a1db-118f-49c6-acba-40fcf78a0d17_dossier.i6z	NDA208471-lixisenatide	320367-13-3	(4S)-5-[[2-[[(2S,3R)-1-[[(2S)-1-[[(2S,3R)-1-[[(2S)-1-[[(2S)-1-[[(2S)-1-[[(2S)-1-[[(2S)-6-amino-1-[[(2S)-5-amino-1-[[(2S)-1-[[(2S)-1-[[(2S)-1-[[(2S)-1-[[(2S)-1-[[(2S)-1-[[(2S)-1-[[(2S)-1-[[(2S)-1-[[(2S,3S)-1-[[(2S)-1-[[(2S)-1-[[(2S)-1-[[(2S)-6-amino-1-[[(2S)-4-amino-1-[[2-[[2-[(2S)-2-[[(2S)-1-[[(2S)-1-[[2-[[(2S)-1-[(2S)-2-[(2S)-2-[[(2S)-1-[[(2S)-6-amino-1-[[(2S)-6-amino-1-[[(2S)-6-amino-1-[[(2S)-6…	v2	NDA208471	ALIMENTARY TRACT AND METABOLISM	4104304f-2d53-4dc4-8ea5-99e489d0f966	d567a1db-118f-49c6-acba-40fcf78a0d17	46161383	4eee6cbb-7f25-48f8-912e-3d308f5c848b	Carcinogenicity	61280	carcinogenicity, other	1895	experimental study				{"AdministrativeData": {"Endpoint": {"code": "61280"}, "StudyResultType": {"code": "1895"}, "RobustStudy": false, "UsedForClassification": false, "UsedForMSDS": false}, "MaterialsAndMethods": {"TestMaterials": {"TestMaterialInformation": "7a31021f-0f54-4115-b16b-e08f1478d5e9/4104304f-2d53-4dc4-8ea5-99e489d0f966", "SpecificDetailsOnTestMaterialUsedForTheStudy": "#PPL-AVE100501A (until 31 Oct 2007)…	mouse	CD-1	subcutaneous	2 years	twice daily	None other:ug/kg/day, 40.0 other:ug/kg/day, 200.0 other:ug/kg/day, 1000.0 other:ug/kg/day																	Key Study Findings • There were no treatment-related effects on mortality. There were no noteworthy differences in deaths due to tumors or non-tumor causes between control and treated animals. • Treatment-related clinical signs included an increased incidence in distended abdomens for all treated groups and a slight increase in corneal opacity for high-dose males and females. • A dose-related inc…			Key Study Findings • There were no treatment-related effects on mortality. There were no noteworthy differences in deaths due to tumors or non-tumor causes between control and treated animals. • Treatment-related clinical signs included an increased incidence in distended abdomens for all treated groups and a slight increase in corneal opacity for high-dose males and females. • A dose-related inc…	f93ae5ad-50ac-4ddf-b563-30ca696c0b2d	FALSE	{'code': '1342', 'code (mapped)': 'other:', 'other': 'Not reported by medical writer'}	1109
229d77fb-d4cd-4ae7-8216-60b0ebbf43f5_dossier.i6z	NDA020838-candesartan cilexetil	145040-37-5	1-cyclohexyloxycarbonyloxyethyl 2-ethoxy-3-[[4-[2-(2H-tetrazol-5-yl)phenyl]phenyl]methyl]benzimidazole-4-carboxylate	v2	NDA020838	CARDIOVASCULAR SYSTEM	a5a28d5d-8005-401b-9e14-65a818f42c51	229d77fb-d4cd-4ae7-8216-60b0ebbf43f5	46161447	4d6676db-6268-43c0-82b1-66c52a0eac09	Carcinogenicity	61277	carcinogenicity: oral	1895	experimental study				{"AdministrativeData": {"Endpoint": {"code": "61277"}, "StudyResultType": {"code": "1895"}, "RobustStudy": false, "UsedForClassification": false, "UsedForMSDS": false}, "MaterialsAndMethods": {"TestMaterials": {"TestMaterialInformation": "0260d68a-deaa-4ec5-ac20-3470b5c643a3/a5a28d5d-8005-401b-9e14-65a818f42c51", "SpecificDetailsOnTestMaterialUsedForTheStudy": "Lot # M464-016"}, "TestAnimals": {"…	mouse	B6C3F1	oral: gavage	13 weeks	not specified	30.0 mg/kg bw/day (actual dose received), 300.0 mg/kg bw/day (actual dose received), 100.0 mg/kg bw/day (actual dose received), 10.0 mg/kg bw/day (actual dose received), None mg/kg bw/day (actual dose received)		Plasma urea nitrogen values for females in the 100 and 300 mg candesartan cilexetil/kg/day groups were elevated above control. Higher than control total protein was noted in females treated with 300 mg candesartan cilexetil/kg/day and higher than control levels of ALP were observed in the 300 mg/kg/day male group and in the 100 and 300 mg/kg/day female groups (Table 96).						Lower than control erythrocyte counts, hematocrit and hemoglobin concentrations were observed among all candesartan cilexetil-treated male groups. In female treated groups, these hematologic parameters tended to be lower than control but the differences were not dose-dependent and not statistically significant (Table 95).	Higher than control incidence of hyperplasia of the juxtaglomerular (JG) cells of the kidney was seen in males and females in each candesartan cilexetil treated group, and renal tubular basophilia was seen in males and females receiving 30 mg candesartan cilexetil/kg/day or more (Table 98).			Lower than control absolute and/or relative heart weights were observed in all treated male groups and in females in the 30, 100 and 300 mg candesartan cilexetil/kg/day groups (Table 97). Other organ weights among treated groups were comparable to control.					Results_x000D_ Mortality and Clinical Signs: No animals died during the study. No treatment-related clinical signs of toxicity were observed._x000D_ _x000D_ Body Weight. Body weights among candesartan cilexetil-treated animals were comparable to control. (Fig. 15, Table 93)._x000D_ _x000D_ _x000D_ _x000D_ _x000D_ _x000D_ _x000D_ Food Consumption: Food consumption among candesartan cilexetil-treat…			Results_x000D_ Mortality and Clinical Signs: No animals died during the study. No treatment-related clinical signs of toxicity were observed._x000D_ _x000D_ Body Weight. Body weights among candesartan cilexetil-treated animals were comparable to control. (Fig. 15, Table 93)._x000D_ _x000D_ _x000D_ _x000D_ _x000D_ _x000D_ _x000D_ Food Consumption: Food consumption among candesartan cilexetil-treat…	0f8f02b8-e3c5-4881-b785-5350a8f61df5	FALSE	{'code': '61012', 'code (mapped)': 'body weight and weight gain'}	1130
229d77fb-d4cd-4ae7-8216-60b0ebbf43f5_dossier.i6z	NDA020838-candesartan cilexetil	145040-37-5	1-cyclohexyloxycarbonyloxyethyl 2-ethoxy-3-[[4-[2-(2H-tetrazol-5-yl)phenyl]phenyl]methyl]benzimidazole-4-carboxylate	v2	NDA020838	CARDIOVASCULAR SYSTEM	a5a28d5d-8005-401b-9e14-65a818f42c51	229d77fb-d4cd-4ae7-8216-60b0ebbf43f5	46161447	4d6676db-6268-43c0-82b1-66c52a0eac09	Carcinogenicity	61277	carcinogenicity: oral	1895	experimental study				{"AdministrativeData": {"Endpoint": {"code": "61277"}, "StudyResultType": {"code": "1895"}, "RobustStudy": false, "UsedForClassification": false, "UsedForMSDS": false}, "MaterialsAndMethods": {"TestMaterials": {"TestMaterialInformation": "0260d68a-deaa-4ec5-ac20-3470b5c643a3/a5a28d5d-8005-401b-9e14-65a818f42c51", "SpecificDetailsOnTestMaterialUsedForTheStudy": "Lot # M464-016"}, "TestAnimals": {"…	mouse	B6C3F1	oral: gavage	13 weeks	not specified	30.0 mg/kg bw/day (actual dose received), 300.0 mg/kg bw/day (actual dose received), 100.0 mg/kg bw/day (actual dose received), 10.0 mg/kg bw/day (actual dose received), None mg/kg bw/day (actual dose received)		Plasma urea nitrogen values for females in the 100 and 300 mg candesartan cilexetil/kg/day groups were elevated above control. Higher than control total protein was noted in females treated with 300 mg candesartan cilexetil/kg/day and higher than control levels of ALP were observed in the 300 mg/kg/day male group and in the 100 and 300 mg/kg/day female groups (Table 96).						Lower than control erythrocyte counts, hematocrit and hemoglobin concentrations were observed among all candesartan cilexetil-treated male groups. In female treated groups, these hematologic parameters tended to be lower than control but the differences were not dose-dependent and not statistically significant (Table 95).	Higher than control incidence of hyperplasia of the juxtaglomerular (JG) cells of the kidney was seen in males and females in each candesartan cilexetil treated group, and renal tubular basophilia was seen in males and females receiving 30 mg candesartan cilexetil/kg/day or more (Table 98).			Lower than control absolute and/or relative heart weights were observed in all treated male groups and in females in the 30, 100 and 300 mg candesartan cilexetil/kg/day groups (Table 97). Other organ weights among treated groups were comparable to control.					Results_x000D_ Mortality and Clinical Signs: No animals died during the study. No treatment-related clinical signs of toxicity were observed._x000D_ _x000D_ Body Weight. Body weights among candesartan cilexetil-treated animals were comparable to control. (Fig. 15, Table 93)._x000D_ _x000D_ _x000D_ _x000D_ _x000D_ _x000D_ _x000D_ Food Consumption: Food consumption among candesartan cilexetil-treat…			Results_x000D_ Mortality and Clinical Signs: No animals died during the study. No treatment-related clinical signs of toxicity were observed._x000D_ _x000D_ Body Weight. Body weights among candesartan cilexetil-treated animals were comparable to control. (Fig. 15, Table 93)._x000D_ _x000D_ _x000D_ _x000D_ _x000D_ _x000D_ _x000D_ Food Consumption: Food consumption among candesartan cilexetil-treat…	142cc110-1603-4614-9278-a6f2af4499c3	FALSE	{'code': '61017', 'code (mapped)': 'haematology'}	345
229d77fb-d4cd-4ae7-8216-60b0ebbf43f5_dossier.i6z	NDA020838-candesartan cilexetil	145040-37-5	1-cyclohexyloxycarbonyloxyethyl 2-ethoxy-3-[[4-[2-(2H-tetrazol-5-yl)phenyl]phenyl]methyl]benzimidazole-4-carboxylate	v2	NDA020838	CARDIOVASCULAR SYSTEM	a5a28d5d-8005-401b-9e14-65a818f42c51	229d77fb-d4cd-4ae7-8216-60b0ebbf43f5	46161447	4d6676db-6268-43c0-82b1-66c52a0eac09	Carcinogenicity	61277	carcinogenicity: oral	1895	experimental study				{"AdministrativeData": {"Endpoint": {"code": "61277"}, "StudyResultType": {"code": "1895"}, "RobustStudy": false, "UsedForClassification": false, "UsedForMSDS": false}, "MaterialsAndMethods": {"TestMaterials": {"TestMaterialInformation": "0260d68a-deaa-4ec5-ac20-3470b5c643a3/a5a28d5d-8005-401b-9e14-65a818f42c51", "SpecificDetailsOnTestMaterialUsedForTheStudy": "Lot # M464-016"}, "TestAnimals": {"…	mouse	B6C3F1	oral: gavage	13 weeks	not specified	30.0 mg/kg bw/day (actual dose received), 300.0 mg/kg bw/day (actual dose received), 100.0 mg/kg bw/day (actual dose received), 10.0 mg/kg bw/day (actual dose received), None mg/kg bw/day (actual dose received)		Plasma urea nitrogen values for females in the 100 and 300 mg candesartan cilexetil/kg/day groups were elevated above control. Higher than control total protein was noted in females treated with 300 mg candesartan cilexetil/kg/day and higher than control levels of ALP were observed in the 300 mg/kg/day male group and in the 100 and 300 mg/kg/day female groups (Table 96).						Lower than control erythrocyte counts, hematocrit and hemoglobin concentrations were observed among all candesartan cilexetil-treated male groups. In female treated groups, these hematologic parameters tended to be lower than control but the differences were not dose-dependent and not statistically significant (Table 95).	Higher than control incidence of hyperplasia of the juxtaglomerular (JG) cells of the kidney was seen in males and females in each candesartan cilexetil treated group, and renal tubular basophilia was seen in males and females receiving 30 mg candesartan cilexetil/kg/day or more (Table 98).			Lower than control absolute and/or relative heart weights were observed in all treated male groups and in females in the 30, 100 and 300 mg candesartan cilexetil/kg/day groups (Table 97). Other organ weights among treated groups were comparable to control.					Results_x000D_ Mortality and Clinical Signs: No animals died during the study. No treatment-related clinical signs of toxicity were observed._x000D_ _x000D_ Body Weight. Body weights among candesartan cilexetil-treated animals were comparable to control. (Fig. 15, Table 93)._x000D_ _x000D_ _x000D_ _x000D_ _x000D_ _x000D_ _x000D_ Food Consumption: Food consumption among candesartan cilexetil-treat…			Results_x000D_ Mortality and Clinical Signs: No animals died during the study. No treatment-related clinical signs of toxicity were observed._x000D_ _x000D_ Body Weight. Body weights among candesartan cilexetil-treated animals were comparable to control. (Fig. 15, Table 93)._x000D_ _x000D_ _x000D_ _x000D_ _x000D_ _x000D_ _x000D_ Food Consumption: Food consumption among candesartan cilexetil-treat…	142cc110-1603-4614-9278-a6f2af4499c3	FALSE	{'code': '61017', 'code (mapped)': 'haematology'}	345
229d77fb-d4cd-4ae7-8216-60b0ebbf43f5_dossier.i6z	NDA020838-candesartan cilexetil	145040-37-5	1-cyclohexyloxycarbonyloxyethyl 2-ethoxy-3-[[4-[2-(2H-tetrazol-5-yl)phenyl]phenyl]methyl]benzimidazole-4-carboxylate	v2	NDA020838	CARDIOVASCULAR SYSTEM	a5a28d5d-8005-401b-9e14-65a818f42c51	229d77fb-d4cd-4ae7-8216-60b0ebbf43f5	46161447	4d6676db-6268-43c0-82b1-66c52a0eac09	Carcinogenicity	61277	carcinogenicity: oral	1895	experimental study				{"AdministrativeData": {"Endpoint": {"code": "61277"}, "StudyResultType": {"code": "1895"}, "RobustStudy": false, "UsedForClassification": false, "UsedForMSDS": false}, "MaterialsAndMethods": {"TestMaterials": {"TestMaterialInformation": "0260d68a-deaa-4ec5-ac20-3470b5c643a3/a5a28d5d-8005-401b-9e14-65a818f42c51", "SpecificDetailsOnTestMaterialUsedForTheStudy": "Lot # M464-016"}, "TestAnimals": {"…	mouse	B6C3F1	oral: gavage	13 weeks	not specified	30.0 mg/kg bw/day (actual dose received), 300.0 mg/kg bw/day (actual dose received), 100.0 mg/kg bw/day (actual dose received), 10.0 mg/kg bw/day (actual dose received), None mg/kg bw/day (actual dose received)		Plasma urea nitrogen values for females in the 100 and 300 mg candesartan cilexetil/kg/day groups were elevated above control. Higher than control total protein was noted in females treated with 300 mg candesartan cilexetil/kg/day and higher than control levels of ALP were observed in the 300 mg/kg/day male group and in the 100 and 300 mg/kg/day female groups (Table 96).						Lower than control erythrocyte counts, hematocrit and hemoglobin concentrations were observed among all candesartan cilexetil-treated male groups. In female treated groups, these hematologic parameters tended to be lower than control but the differences were not dose-dependent and not statistically significant (Table 95).	Higher than control incidence of hyperplasia of the juxtaglomerular (JG) cells of the kidney was seen in males and females in each candesartan cilexetil treated group, and renal tubular basophilia was seen in males and females receiving 30 mg candesartan cilexetil/kg/day or more (Table 98).			Lower than control absolute and/or relative heart weights were observed in all treated male groups and in females in the 30, 100 and 300 mg candesartan cilexetil/kg/day groups (Table 97). Other organ weights among treated groups were comparable to control.					Results_x000D_ Mortality and Clinical Signs: No animals died during the study. No treatment-related clinical signs of toxicity were observed._x000D_ _x000D_ Body Weight. Body weights among candesartan cilexetil-treated animals were comparable to control. (Fig. 15, Table 93)._x000D_ _x000D_ _x000D_ _x000D_ _x000D_ _x000D_ _x000D_ Food Consumption: Food consumption among candesartan cilexetil-treat…			Results_x000D_ Mortality and Clinical Signs: No animals died during the study. No treatment-related clinical signs of toxicity were observed._x000D_ _x000D_ Body Weight. Body weights among candesartan cilexetil-treated animals were comparable to control. (Fig. 15, Table 93)._x000D_ _x000D_ _x000D_ _x000D_ _x000D_ _x000D_ _x000D_ Food Consumption: Food consumption among candesartan cilexetil-treat…	20e53acf-044c-4fe0-a918-929ed021a15c	FALSE		1109
229d77fb-d4cd-4ae7-8216-60b0ebbf43f5_dossier.i6z	NDA020838-candesartan cilexetil	145040-37-5	1-cyclohexyloxycarbonyloxyethyl 2-ethoxy-3-[[4-[2-(2H-tetrazol-5-yl)phenyl]phenyl]methyl]benzimidazole-4-carboxylate	v2	NDA020838	CARDIOVASCULAR SYSTEM	a5a28d5d-8005-401b-9e14-65a818f42c51	229d77fb-d4cd-4ae7-8216-60b0ebbf43f5	46161447	4d6676db-6268-43c0-82b1-66c52a0eac09	Carcinogenicity	61277	carcinogenicity: oral	1895	experimental study				{"AdministrativeData": {"Endpoint": {"code": "61277"}, "StudyResultType": {"code": "1895"}, "RobustStudy": false, "UsedForClassification": false, "UsedForMSDS": false}, "MaterialsAndMethods": {"TestMaterials": {"TestMaterialInformation": "0260d68a-deaa-4ec5-ac20-3470b5c643a3/a5a28d5d-8005-401b-9e14-65a818f42c51", "SpecificDetailsOnTestMaterialUsedForTheStudy": "Lot # M464-016"}, "TestAnimals": {"…	mouse	B6C3F1	oral: gavage	13 weeks	not specified	30.0 mg/kg bw/day (actual dose received), 300.0 mg/kg bw/day (actual dose received), 100.0 mg/kg bw/day (actual dose received), 10.0 mg/kg bw/day (actual dose received), None mg/kg bw/day (actual dose received)		Plasma urea nitrogen values for females in the 100 and 300 mg candesartan cilexetil/kg/day groups were elevated above control. Higher than control total protein was noted in females treated with 300 mg candesartan cilexetil/kg/day and higher than control levels of ALP were observed in the 300 mg/kg/day male group and in the 100 and 300 mg/kg/day female groups (Table 96).						Lower than control erythrocyte counts, hematocrit and hemoglobin concentrations were observed among all candesartan cilexetil-treated male groups. In female treated groups, these hematologic parameters tended to be lower than control but the differences were not dose-dependent and not statistically significant (Table 95).	Higher than control incidence of hyperplasia of the juxtaglomerular (JG) cells of the kidney was seen in males and females in each candesartan cilexetil treated group, and renal tubular basophilia was seen in males and females receiving 30 mg candesartan cilexetil/kg/day or more (Table 98).			Lower than control absolute and/or relative heart weights were observed in all treated male groups and in females in the 30, 100 and 300 mg candesartan cilexetil/kg/day groups (Table 97). Other organ weights among treated groups were comparable to control.					Results_x000D_ Mortality and Clinical Signs: No animals died during the study. No treatment-related clinical signs of toxicity were observed._x000D_ _x000D_ Body Weight. Body weights among candesartan cilexetil-treated animals were comparable to control. (Fig. 15, Table 93)._x000D_ _x000D_ _x000D_ _x000D_ _x000D_ _x000D_ _x000D_ Food Consumption: Food consumption among candesartan cilexetil-treat…			Results_x000D_ Mortality and Clinical Signs: No animals died during the study. No treatment-related clinical signs of toxicity were observed._x000D_ _x000D_ Body Weight. Body weights among candesartan cilexetil-treated animals were comparable to control. (Fig. 15, Table 93)._x000D_ _x000D_ _x000D_ _x000D_ _x000D_ _x000D_ _x000D_ Food Consumption: Food consumption among candesartan cilexetil-treat…	335504d5-1faa-4c2f-93be-79e8234ac345	FALSE	{'code': '61025', 'code (mapped)': 'histopathology: non-neoplastic'}	345
229d77fb-d4cd-4ae7-8216-60b0ebbf43f5_dossier.i6z	NDA020838-candesartan cilexetil	145040-37-5	1-cyclohexyloxycarbonyloxyethyl 2-ethoxy-3-[[4-[2-(2H-tetrazol-5-yl)phenyl]phenyl]methyl]benzimidazole-4-carboxylate	v2	NDA020838	CARDIOVASCULAR SYSTEM	a5a28d5d-8005-401b-9e14-65a818f42c51	229d77fb-d4cd-4ae7-8216-60b0ebbf43f5	46161447	4d6676db-6268-43c0-82b1-66c52a0eac09	Carcinogenicity	61277	carcinogenicity: oral	1895	experimental study				{"AdministrativeData": {"Endpoint": {"code": "61277"}, "StudyResultType": {"code": "1895"}, "RobustStudy": false, "UsedForClassification": false, "UsedForMSDS": false}, "MaterialsAndMethods": {"TestMaterials": {"TestMaterialInformation": "0260d68a-deaa-4ec5-ac20-3470b5c643a3/a5a28d5d-8005-401b-9e14-65a818f42c51", "SpecificDetailsOnTestMaterialUsedForTheStudy": "Lot # M464-016"}, "TestAnimals": {"…	mouse	B6C3F1	oral: gavage	13 weeks	not specified	30.0 mg/kg bw/day (actual dose received), 300.0 mg/kg bw/day (actual dose received), 100.0 mg/kg bw/day (actual dose received), 10.0 mg/kg bw/day (actual dose received), None mg/kg bw/day (actual dose received)		Plasma urea nitrogen values for females in the 100 and 300 mg candesartan cilexetil/kg/day groups were elevated above control. Higher than control total protein was noted in females treated with 300 mg candesartan cilexetil/kg/day and higher than control levels of ALP were observed in the 300 mg/kg/day male group and in the 100 and 300 mg/kg/day female groups (Table 96).						Lower than control erythrocyte counts, hematocrit and hemoglobin concentrations were observed among all candesartan cilexetil-treated male groups. In female treated groups, these hematologic parameters tended to be lower than control but the differences were not dose-dependent and not statistically significant (Table 95).	Higher than control incidence of hyperplasia of the juxtaglomerular (JG) cells of the kidney was seen in males and females in each candesartan cilexetil treated group, and renal tubular basophilia was seen in males and females receiving 30 mg candesartan cilexetil/kg/day or more (Table 98).			Lower than control absolute and/or relative heart weights were observed in all treated male groups and in females in the 30, 100 and 300 mg candesartan cilexetil/kg/day groups (Table 97). Other organ weights among treated groups were comparable to control.					Results_x000D_ Mortality and Clinical Signs: No animals died during the study. No treatment-related clinical signs of toxicity were observed._x000D_ _x000D_ Body Weight. Body weights among candesartan cilexetil-treated animals were comparable to control. (Fig. 15, Table 93)._x000D_ _x000D_ _x000D_ _x000D_ _x000D_ _x000D_ _x000D_ Food Consumption: Food consumption among candesartan cilexetil-treat…			Results_x000D_ Mortality and Clinical Signs: No animals died during the study. No treatment-related clinical signs of toxicity were observed._x000D_ _x000D_ Body Weight. Body weights among candesartan cilexetil-treated animals were comparable to control. (Fig. 15, Table 93)._x000D_ _x000D_ _x000D_ _x000D_ _x000D_ _x000D_ _x000D_ Food Consumption: Food consumption among candesartan cilexetil-treat…	4f786724-7438-44ef-9647-b567591841cd	FALSE	{'code': '61018', 'code (mapped)': 'clinical biochemistry'}	345
229d77fb-d4cd-4ae7-8216-60b0ebbf43f5_dossier.i6z	NDA020838-candesartan cilexetil	145040-37-5	1-cyclohexyloxycarbonyloxyethyl 2-ethoxy-3-[[4-[2-(2H-tetrazol-5-yl)phenyl]phenyl]methyl]benzimidazole-4-carboxylate	v2	NDA020838	CARDIOVASCULAR SYSTEM	a5a28d5d-8005-401b-9e14-65a818f42c51	229d77fb-d4cd-4ae7-8216-60b0ebbf43f5	46161447	4d6676db-6268-43c0-82b1-66c52a0eac09	Carcinogenicity	61277	carcinogenicity: oral	1895	experimental study				{"AdministrativeData": {"Endpoint": {"code": "61277"}, "StudyResultType": {"code": "1895"}, "RobustStudy": false, "UsedForClassification": false, "UsedForMSDS": false}, "MaterialsAndMethods": {"TestMaterials": {"TestMaterialInformation": "0260d68a-deaa-4ec5-ac20-3470b5c643a3/a5a28d5d-8005-401b-9e14-65a818f42c51", "SpecificDetailsOnTestMaterialUsedForTheStudy": "Lot # M464-016"}, "TestAnimals": {"…	mouse	B6C3F1	oral: gavage	13 weeks	not specified	30.0 mg/kg bw/day (actual dose received), 300.0 mg/kg bw/day (actual dose received), 100.0 mg/kg bw/day (actual dose received), 10.0 mg/kg bw/day (actual dose received), None mg/kg bw/day (actual dose received)		Plasma urea nitrogen values for females in the 100 and 300 mg candesartan cilexetil/kg/day groups were elevated above control. Higher than control total protein was noted in females treated with 300 mg candesartan cilexetil/kg/day and higher than control levels of ALP were observed in the 300 mg/kg/day male group and in the 100 and 300 mg/kg/day female groups (Table 96).						Lower than control erythrocyte counts, hematocrit and hemoglobin concentrations were observed among all candesartan cilexetil-treated male groups. In female treated groups, these hematologic parameters tended to be lower than control but the differences were not dose-dependent and not statistically significant (Table 95).	Higher than control incidence of hyperplasia of the juxtaglomerular (JG) cells of the kidney was seen in males and females in each candesartan cilexetil treated group, and renal tubular basophilia was seen in males and females receiving 30 mg candesartan cilexetil/kg/day or more (Table 98).			Lower than control absolute and/or relative heart weights were observed in all treated male groups and in females in the 30, 100 and 300 mg candesartan cilexetil/kg/day groups (Table 97). Other organ weights among treated groups were comparable to control.					Results_x000D_ Mortality and Clinical Signs: No animals died during the study. No treatment-related clinical signs of toxicity were observed._x000D_ _x000D_ Body Weight. Body weights among candesartan cilexetil-treated animals were comparable to control. (Fig. 15, Table 93)._x000D_ _x000D_ _x000D_ _x000D_ _x000D_ _x000D_ _x000D_ Food Consumption: Food consumption among candesartan cilexetil-treat…			Results_x000D_ Mortality and Clinical Signs: No animals died during the study. No treatment-related clinical signs of toxicity were observed._x000D_ _x000D_ Body Weight. Body weights among candesartan cilexetil-treated animals were comparable to control. (Fig. 15, Table 93)._x000D_ _x000D_ _x000D_ _x000D_ _x000D_ _x000D_ _x000D_ Food Consumption: Food consumption among candesartan cilexetil-treat…	5e61b4aa-0906-4043-86f5-29c5e30bdf3b	FALSE	{'code': '61022', 'code (mapped)': 'organ weights and organ / body weight ratios'}	345
229d77fb-d4cd-4ae7-8216-60b0ebbf43f5_dossier.i6z	NDA020838-candesartan cilexetil	145040-37-5	1-cyclohexyloxycarbonyloxyethyl 2-ethoxy-3-[[4-[2-(2H-tetrazol-5-yl)phenyl]phenyl]methyl]benzimidazole-4-carboxylate	v2	NDA020838	CARDIOVASCULAR SYSTEM	a5a28d5d-8005-401b-9e14-65a818f42c51	229d77fb-d4cd-4ae7-8216-60b0ebbf43f5	46161447	4d6676db-6268-43c0-82b1-66c52a0eac09	Carcinogenicity	61277	carcinogenicity: oral	1895	experimental study				{"AdministrativeData": {"Endpoint": {"code": "61277"}, "StudyResultType": {"code": "1895"}, "RobustStudy": false, "UsedForClassification": false, "UsedForMSDS": false}, "MaterialsAndMethods": {"TestMaterials": {"TestMaterialInformation": "0260d68a-deaa-4ec5-ac20-3470b5c643a3/a5a28d5d-8005-401b-9e14-65a818f42c51", "SpecificDetailsOnTestMaterialUsedForTheStudy": "Lot # M464-016"}, "TestAnimals": {"…	mouse	B6C3F1	oral: gavage	13 weeks	not specified	30.0 mg/kg bw/day (actual dose received), 300.0 mg/kg bw/day (actual dose received), 100.0 mg/kg bw/day (actual dose received), 10.0 mg/kg bw/day (actual dose received), None mg/kg bw/day (actual dose received)		Plasma urea nitrogen values for females in the 100 and 300 mg candesartan cilexetil/kg/day groups were elevated above control. Higher than control total protein was noted in females treated with 300 mg candesartan cilexetil/kg/day and higher than control levels of ALP were observed in the 300 mg/kg/day male group and in the 100 and 300 mg/kg/day female groups (Table 96).						Lower than control erythrocyte counts, hematocrit and hemoglobin concentrations were observed among all candesartan cilexetil-treated male groups. In female treated groups, these hematologic parameters tended to be lower than control but the differences were not dose-dependent and not statistically significant (Table 95).	Higher than control incidence of hyperplasia of the juxtaglomerular (JG) cells of the kidney was seen in males and females in each candesartan cilexetil treated group, and renal tubular basophilia was seen in males and females receiving 30 mg candesartan cilexetil/kg/day or more (Table 98).			Lower than control absolute and/or relative heart weights were observed in all treated male groups and in females in the 30, 100 and 300 mg candesartan cilexetil/kg/day groups (Table 97). Other organ weights among treated groups were comparable to control.					Results_x000D_ Mortality and Clinical Signs: No animals died during the study. No treatment-related clinical signs of toxicity were observed._x000D_ _x000D_ Body Weight. Body weights among candesartan cilexetil-treated animals were comparable to control. (Fig. 15, Table 93)._x000D_ _x000D_ _x000D_ _x000D_ _x000D_ _x000D_ _x000D_ Food Consumption: Food consumption among candesartan cilexetil-treat…			Results_x000D_ Mortality and Clinical Signs: No animals died during the study. No treatment-related clinical signs of toxicity were observed._x000D_ _x000D_ Body Weight. Body weights among candesartan cilexetil-treated animals were comparable to control. (Fig. 15, Table 93)._x000D_ _x000D_ _x000D_ _x000D_ _x000D_ _x000D_ _x000D_ Food Consumption: Food consumption among candesartan cilexetil-treat…	5e61b4aa-0906-4043-86f5-29c5e30bdf3b	FALSE	{'code': '61022', 'code (mapped)': 'organ weights and organ / body weight ratios'}	345
229d77fb-d4cd-4ae7-8216-60b0ebbf43f5_dossier.i6z	NDA020838-candesartan cilexetil	145040-37-5	1-cyclohexyloxycarbonyloxyethyl 2-ethoxy-3-[[4-[2-(2H-tetrazol-5-yl)phenyl]phenyl]methyl]benzimidazole-4-carboxylate	v2	NDA020838	CARDIOVASCULAR SYSTEM	a5a28d5d-8005-401b-9e14-65a818f42c51	229d77fb-d4cd-4ae7-8216-60b0ebbf43f5	46161447	4d6676db-6268-43c0-82b1-66c52a0eac09	Carcinogenicity	61277	carcinogenicity: oral	1895	experimental study				{"AdministrativeData": {"Endpoint": {"code": "61277"}, "StudyResultType": {"code": "1895"}, "RobustStudy": false, "UsedForClassification": false, "UsedForMSDS": false}, "MaterialsAndMethods": {"TestMaterials": {"TestMaterialInformation": "0260d68a-deaa-4ec5-ac20-3470b5c643a3/a5a28d5d-8005-401b-9e14-65a818f42c51", "SpecificDetailsOnTestMaterialUsedForTheStudy": "Lot # M464-016"}, "TestAnimals": {"…	mouse	B6C3F1	oral: gavage	13 weeks	not specified	30.0 mg/kg bw/day (actual dose received), 300.0 mg/kg bw/day (actual dose received), 100.0 mg/kg bw/day (actual dose received), 10.0 mg/kg bw/day (actual dose received), None mg/kg bw/day (actual dose received)		Plasma urea nitrogen values for females in the 100 and 300 mg candesartan cilexetil/kg/day groups were elevated above control. Higher than control total protein was noted in females treated with 300 mg candesartan cilexetil/kg/day and higher than control levels of ALP were observed in the 300 mg/kg/day male group and in the 100 and 300 mg/kg/day female groups (Table 96).						Lower than control erythrocyte counts, hematocrit and hemoglobin concentrations were observed among all candesartan cilexetil-treated male groups. In female treated groups, these hematologic parameters tended to be lower than control but the differences were not dose-dependent and not statistically significant (Table 95).	Higher than control incidence of hyperplasia of the juxtaglomerular (JG) cells of the kidney was seen in males and females in each candesartan cilexetil treated group, and renal tubular basophilia was seen in males and females receiving 30 mg candesartan cilexetil/kg/day or more (Table 98).			Lower than control absolute and/or relative heart weights were observed in all treated male groups and in females in the 30, 100 and 300 mg candesartan cilexetil/kg/day groups (Table 97). Other organ weights among treated groups were comparable to control.					Results_x000D_ Mortality and Clinical Signs: No animals died during the study. No treatment-related clinical signs of toxicity were observed._x000D_ _x000D_ Body Weight. Body weights among candesartan cilexetil-treated animals were comparable to control. (Fig. 15, Table 93)._x000D_ _x000D_ _x000D_ _x000D_ _x000D_ _x000D_ _x000D_ Food Consumption: Food consumption among candesartan cilexetil-treat…			Results_x000D_ Mortality and Clinical Signs: No animals died during the study. No treatment-related clinical signs of toxicity were observed._x000D_ _x000D_ Body Weight. Body weights among candesartan cilexetil-treated animals were comparable to control. (Fig. 15, Table 93)._x000D_ _x000D_ _x000D_ _x000D_ _x000D_ _x000D_ _x000D_ Food Consumption: Food consumption among candesartan cilexetil-treat…	6745e579-9bb1-488c-b93e-09f74ea69862	FALSE	{'code': '61018', 'code (mapped)': 'clinical biochemistry'}	345
229d77fb-d4cd-4ae7-8216-60b0ebbf43f5_dossier.i6z	NDA020838-candesartan cilexetil	145040-37-5	1-cyclohexyloxycarbonyloxyethyl 2-ethoxy-3-[[4-[2-(2H-tetrazol-5-yl)phenyl]phenyl]methyl]benzimidazole-4-carboxylate	v2	NDA020838	CARDIOVASCULAR SYSTEM	a5a28d5d-8005-401b-9e14-65a818f42c51	229d77fb-d4cd-4ae7-8216-60b0ebbf43f5	46161447	4d6676db-6268-43c0-82b1-66c52a0eac09	Carcinogenicity	61277	carcinogenicity: oral	1895	experimental study				{"AdministrativeData": {"Endpoint": {"code": "61277"}, "StudyResultType": {"code": "1895"}, "RobustStudy": false, "UsedForClassification": false, "UsedForMSDS": false}, "MaterialsAndMethods": {"TestMaterials": {"TestMaterialInformation": "0260d68a-deaa-4ec5-ac20-3470b5c643a3/a5a28d5d-8005-401b-9e14-65a818f42c51", "SpecificDetailsOnTestMaterialUsedForTheStudy": "Lot # M464-016"}, "TestAnimals": {"…	mouse	B6C3F1	oral: gavage	13 weeks	not specified	30.0 mg/kg bw/day (actual dose received), 300.0 mg/kg bw/day (actual dose received), 100.0 mg/kg bw/day (actual dose received), 10.0 mg/kg bw/day (actual dose received), None mg/kg bw/day (actual dose received)		Plasma urea nitrogen values for females in the 100 and 300 mg candesartan cilexetil/kg/day groups were elevated above control. Higher than control total protein was noted in females treated with 300 mg candesartan cilexetil/kg/day and higher than control levels of ALP were observed in the 300 mg/kg/day male group and in the 100 and 300 mg/kg/day female groups (Table 96).						Lower than control erythrocyte counts, hematocrit and hemoglobin concentrations were observed among all candesartan cilexetil-treated male groups. In female treated groups, these hematologic parameters tended to be lower than control but the differences were not dose-dependent and not statistically significant (Table 95).	Higher than control incidence of hyperplasia of the juxtaglomerular (JG) cells of the kidney was seen in males and females in each candesartan cilexetil treated group, and renal tubular basophilia was seen in males and females receiving 30 mg candesartan cilexetil/kg/day or more (Table 98).			Lower than control absolute and/or relative heart weights were observed in all treated male groups and in females in the 30, 100 and 300 mg candesartan cilexetil/kg/day groups (Table 97). Other organ weights among treated groups were comparable to control.					Results_x000D_ Mortality and Clinical Signs: No animals died during the study. No treatment-related clinical signs of toxicity were observed._x000D_ _x000D_ Body Weight. Body weights among candesartan cilexetil-treated animals were comparable to control. (Fig. 15, Table 93)._x000D_ _x000D_ _x000D_ _x000D_ _x000D_ _x000D_ _x000D_ Food Consumption: Food consumption among candesartan cilexetil-treat…			Results_x000D_ Mortality and Clinical Signs: No animals died during the study. No treatment-related clinical signs of toxicity were observed._x000D_ _x000D_ Body Weight. Body weights among candesartan cilexetil-treated animals were comparable to control. (Fig. 15, Table 93)._x000D_ _x000D_ _x000D_ _x000D_ _x000D_ _x000D_ _x000D_ Food Consumption: Food consumption among candesartan cilexetil-treat…	6de38c3f-c6cb-4f7d-9a2d-1473f2a79c89	FALSE	{'code': '61011', 'code (mapped)': 'clinical signs'}	1130
229d77fb-d4cd-4ae7-8216-60b0ebbf43f5_dossier.i6z	NDA020838-candesartan cilexetil	145040-37-5	1-cyclohexyloxycarbonyloxyethyl 2-ethoxy-3-[[4-[2-(2H-tetrazol-5-yl)phenyl]phenyl]methyl]benzimidazole-4-carboxylate	v2	NDA020838	CARDIOVASCULAR SYSTEM	a5a28d5d-8005-401b-9e14-65a818f42c51	229d77fb-d4cd-4ae7-8216-60b0ebbf43f5	46161447	4d6676db-6268-43c0-82b1-66c52a0eac09	Carcinogenicity	61277	carcinogenicity: oral	1895	experimental study				{"AdministrativeData": {"Endpoint": {"code": "61277"}, "StudyResultType": {"code": "1895"}, "RobustStudy": false, "UsedForClassification": false, "UsedForMSDS": false}, "MaterialsAndMethods": {"TestMaterials": {"TestMaterialInformation": "0260d68a-deaa-4ec5-ac20-3470b5c643a3/a5a28d5d-8005-401b-9e14-65a818f42c51", "SpecificDetailsOnTestMaterialUsedForTheStudy": "Lot # M464-016"}, "TestAnimals": {"…	mouse	B6C3F1	oral: gavage	13 weeks	not specified	30.0 mg/kg bw/day (actual dose received), 300.0 mg/kg bw/day (actual dose received), 100.0 mg/kg bw/day (actual dose received), 10.0 mg/kg bw/day (actual dose received), None mg/kg bw/day (actual dose received)		Plasma urea nitrogen values for females in the 100 and 300 mg candesartan cilexetil/kg/day groups were elevated above control. Higher than control total protein was noted in females treated with 300 mg candesartan cilexetil/kg/day and higher than control levels of ALP were observed in the 300 mg/kg/day male group and in the 100 and 300 mg/kg/day female groups (Table 96).						Lower than control erythrocyte counts, hematocrit and hemoglobin concentrations were observed among all candesartan cilexetil-treated male groups. In female treated groups, these hematologic parameters tended to be lower than control but the differences were not dose-dependent and not statistically significant (Table 95).	Higher than control incidence of hyperplasia of the juxtaglomerular (JG) cells of the kidney was seen in males and females in each candesartan cilexetil treated group, and renal tubular basophilia was seen in males and females receiving 30 mg candesartan cilexetil/kg/day or more (Table 98).			Lower than control absolute and/or relative heart weights were observed in all treated male groups and in females in the 30, 100 and 300 mg candesartan cilexetil/kg/day groups (Table 97). Other organ weights among treated groups were comparable to control.					Results_x000D_ Mortality and Clinical Signs: No animals died during the study. No treatment-related clinical signs of toxicity were observed._x000D_ _x000D_ Body Weight. Body weights among candesartan cilexetil-treated animals were comparable to control. (Fig. 15, Table 93)._x000D_ _x000D_ _x000D_ _x000D_ _x000D_ _x000D_ _x000D_ Food Consumption: Food consumption among candesartan cilexetil-treat…			Results_x000D_ Mortality and Clinical Signs: No animals died during the study. No treatment-related clinical signs of toxicity were observed._x000D_ _x000D_ Body Weight. Body weights among candesartan cilexetil-treated animals were comparable to control. (Fig. 15, Table 93)._x000D_ _x000D_ _x000D_ _x000D_ _x000D_ _x000D_ _x000D_ Food Consumption: Food consumption among candesartan cilexetil-treat…	98456f14-d89a-465c-9185-a42e13d956d9	FALSE	{'code': '61018', 'code (mapped)': 'clinical biochemistry'}	345
229d77fb-d4cd-4ae7-8216-60b0ebbf43f5_dossier.i6z	NDA020838-candesartan cilexetil	145040-37-5	1-cyclohexyloxycarbonyloxyethyl 2-ethoxy-3-[[4-[2-(2H-tetrazol-5-yl)phenyl]phenyl]methyl]benzimidazole-4-carboxylate	v2	NDA020838	CARDIOVASCULAR SYSTEM	a5a28d5d-8005-401b-9e14-65a818f42c51	229d77fb-d4cd-4ae7-8216-60b0ebbf43f5	46161447	4d6676db-6268-43c0-82b1-66c52a0eac09	Carcinogenicity	61277	carcinogenicity: oral	1895	experimental study				{"AdministrativeData": {"Endpoint": {"code": "61277"}, "StudyResultType": {"code": "1895"}, "RobustStudy": false, "UsedForClassification": false, "UsedForMSDS": false}, "MaterialsAndMethods": {"TestMaterials": {"TestMaterialInformation": "0260d68a-deaa-4ec5-ac20-3470b5c643a3/a5a28d5d-8005-401b-9e14-65a818f42c51", "SpecificDetailsOnTestMaterialUsedForTheStudy": "Lot # M464-016"}, "TestAnimals": {"…	mouse	B6C3F1	oral: gavage	13 weeks	not specified	30.0 mg/kg bw/day (actual dose received), 300.0 mg/kg bw/day (actual dose received), 100.0 mg/kg bw/day (actual dose received), 10.0 mg/kg bw/day (actual dose received), None mg/kg bw/day (actual dose received)		Plasma urea nitrogen values for females in the 100 and 300 mg candesartan cilexetil/kg/day groups were elevated above control. Higher than control total protein was noted in females treated with 300 mg candesartan cilexetil/kg/day and higher than control levels of ALP were observed in the 300 mg/kg/day male group and in the 100 and 300 mg/kg/day female groups (Table 96).						Lower than control erythrocyte counts, hematocrit and hemoglobin concentrations were observed among all candesartan cilexetil-treated male groups. In female treated groups, these hematologic parameters tended to be lower than control but the differences were not dose-dependent and not statistically significant (Table 95).	Higher than control incidence of hyperplasia of the juxtaglomerular (JG) cells of the kidney was seen in males and females in each candesartan cilexetil treated group, and renal tubular basophilia was seen in males and females receiving 30 mg candesartan cilexetil/kg/day or more (Table 98).			Lower than control absolute and/or relative heart weights were observed in all treated male groups and in females in the 30, 100 and 300 mg candesartan cilexetil/kg/day groups (Table 97). Other organ weights among treated groups were comparable to control.					Results_x000D_ Mortality and Clinical Signs: No animals died during the study. No treatment-related clinical signs of toxicity were observed._x000D_ _x000D_ Body Weight. Body weights among candesartan cilexetil-treated animals were comparable to control. (Fig. 15, Table 93)._x000D_ _x000D_ _x000D_ _x000D_ _x000D_ _x000D_ _x000D_ Food Consumption: Food consumption among candesartan cilexetil-treat…			Results_x000D_ Mortality and Clinical Signs: No animals died during the study. No treatment-related clinical signs of toxicity were observed._x000D_ _x000D_ Body Weight. Body weights among candesartan cilexetil-treated animals were comparable to control. (Fig. 15, Table 93)._x000D_ _x000D_ _x000D_ _x000D_ _x000D_ _x000D_ _x000D_ Food Consumption: Food consumption among candesartan cilexetil-treat…	98456f14-d89a-465c-9185-a42e13d956d9	FALSE	{'code': '61018', 'code (mapped)': 'clinical biochemistry'}	345
229d77fb-d4cd-4ae7-8216-60b0ebbf43f5_dossier.i6z	NDA020838-candesartan cilexetil	145040-37-5	1-cyclohexyloxycarbonyloxyethyl 2-ethoxy-3-[[4-[2-(2H-tetrazol-5-yl)phenyl]phenyl]methyl]benzimidazole-4-carboxylate	v2	NDA020838	CARDIOVASCULAR SYSTEM	a5a28d5d-8005-401b-9e14-65a818f42c51	229d77fb-d4cd-4ae7-8216-60b0ebbf43f5	46161447	4d6676db-6268-43c0-82b1-66c52a0eac09	Carcinogenicity	61277	carcinogenicity: oral	1895	experimental study				{"AdministrativeData": {"Endpoint": {"code": "61277"}, "StudyResultType": {"code": "1895"}, "RobustStudy": false, "UsedForClassification": false, "UsedForMSDS": false}, "MaterialsAndMethods": {"TestMaterials": {"TestMaterialInformation": "0260d68a-deaa-4ec5-ac20-3470b5c643a3/a5a28d5d-8005-401b-9e14-65a818f42c51", "SpecificDetailsOnTestMaterialUsedForTheStudy": "Lot # M464-016"}, "TestAnimals": {"…	mouse	B6C3F1	oral: gavage	13 weeks	not specified	30.0 mg/kg bw/day (actual dose received), 300.0 mg/kg bw/day (actual dose received), 100.0 mg/kg bw/day (actual dose received), 10.0 mg/kg bw/day (actual dose received), None mg/kg bw/day (actual dose received)		Plasma urea nitrogen values for females in the 100 and 300 mg candesartan cilexetil/kg/day groups were elevated above control. Higher than control total protein was noted in females treated with 300 mg candesartan cilexetil/kg/day and higher than control levels of ALP were observed in the 300 mg/kg/day male group and in the 100 and 300 mg/kg/day female groups (Table 96).						Lower than control erythrocyte counts, hematocrit and hemoglobin concentrations were observed among all candesartan cilexetil-treated male groups. In female treated groups, these hematologic parameters tended to be lower than control but the differences were not dose-dependent and not statistically significant (Table 95).	Higher than control incidence of hyperplasia of the juxtaglomerular (JG) cells of the kidney was seen in males and females in each candesartan cilexetil treated group, and renal tubular basophilia was seen in males and females receiving 30 mg candesartan cilexetil/kg/day or more (Table 98).			Lower than control absolute and/or relative heart weights were observed in all treated male groups and in females in the 30, 100 and 300 mg candesartan cilexetil/kg/day groups (Table 97). Other organ weights among treated groups were comparable to control.					Results_x000D_ Mortality and Clinical Signs: No animals died during the study. No treatment-related clinical signs of toxicity were observed._x000D_ _x000D_ Body Weight. Body weights among candesartan cilexetil-treated animals were comparable to control. (Fig. 15, Table 93)._x000D_ _x000D_ _x000D_ _x000D_ _x000D_ _x000D_ _x000D_ Food Consumption: Food consumption among candesartan cilexetil-treat…			Results_x000D_ Mortality and Clinical Signs: No animals died during the study. No treatment-related clinical signs of toxicity were observed._x000D_ _x000D_ Body Weight. Body weights among candesartan cilexetil-treated animals were comparable to control. (Fig. 15, Table 93)._x000D_ _x000D_ _x000D_ _x000D_ _x000D_ _x000D_ _x000D_ Food Consumption: Food consumption among candesartan cilexetil-treat…	a3675c69-c6da-4cf8-937f-aa923e81f748	FALSE	{'code': '2135', 'code (mapped)': 'mortality'}	1130
229d77fb-d4cd-4ae7-8216-60b0ebbf43f5_dossier.i6z	NDA020838-candesartan cilexetil	145040-37-5	1-cyclohexyloxycarbonyloxyethyl 2-ethoxy-3-[[4-[2-(2H-tetrazol-5-yl)phenyl]phenyl]methyl]benzimidazole-4-carboxylate	v2	NDA020838	CARDIOVASCULAR SYSTEM	a5a28d5d-8005-401b-9e14-65a818f42c51	229d77fb-d4cd-4ae7-8216-60b0ebbf43f5	46161447	4d6676db-6268-43c0-82b1-66c52a0eac09	Carcinogenicity	61277	carcinogenicity: oral	1895	experimental study				{"AdministrativeData": {"Endpoint": {"code": "61277"}, "StudyResultType": {"code": "1895"}, "RobustStudy": false, "UsedForClassification": false, "UsedForMSDS": false}, "MaterialsAndMethods": {"TestMaterials": {"TestMaterialInformation": "0260d68a-deaa-4ec5-ac20-3470b5c643a3/a5a28d5d-8005-401b-9e14-65a818f42c51", "SpecificDetailsOnTestMaterialUsedForTheStudy": "Lot # M464-016"}, "TestAnimals": {"…	mouse	B6C3F1	oral: gavage	13 weeks	not specified	30.0 mg/kg bw/day (actual dose received), 300.0 mg/kg bw/day (actual dose received), 100.0 mg/kg bw/day (actual dose received), 10.0 mg/kg bw/day (actual dose received), None mg/kg bw/day (actual dose received)		Plasma urea nitrogen values for females in the 100 and 300 mg candesartan cilexetil/kg/day groups were elevated above control. Higher than control total protein was noted in females treated with 300 mg candesartan cilexetil/kg/day and higher than control levels of ALP were observed in the 300 mg/kg/day male group and in the 100 and 300 mg/kg/day female groups (Table 96).						Lower than control erythrocyte counts, hematocrit and hemoglobin concentrations were observed among all candesartan cilexetil-treated male groups. In female treated groups, these hematologic parameters tended to be lower than control but the differences were not dose-dependent and not statistically significant (Table 95).	Higher than control incidence of hyperplasia of the juxtaglomerular (JG) cells of the kidney was seen in males and females in each candesartan cilexetil treated group, and renal tubular basophilia was seen in males and females receiving 30 mg candesartan cilexetil/kg/day or more (Table 98).			Lower than control absolute and/or relative heart weights were observed in all treated male groups and in females in the 30, 100 and 300 mg candesartan cilexetil/kg/day groups (Table 97). Other organ weights among treated groups were comparable to control.					Results_x000D_ Mortality and Clinical Signs: No animals died during the study. No treatment-related clinical signs of toxicity were observed._x000D_ _x000D_ Body Weight. Body weights among candesartan cilexetil-treated animals were comparable to control. (Fig. 15, Table 93)._x000D_ _x000D_ _x000D_ _x000D_ _x000D_ _x000D_ _x000D_ Food Consumption: Food consumption among candesartan cilexetil-treat…			Results_x000D_ Mortality and Clinical Signs: No animals died during the study. No treatment-related clinical signs of toxicity were observed._x000D_ _x000D_ Body Weight. Body weights among candesartan cilexetil-treated animals were comparable to control. (Fig. 15, Table 93)._x000D_ _x000D_ _x000D_ _x000D_ _x000D_ _x000D_ _x000D_ Food Consumption: Food consumption among candesartan cilexetil-treat…	b49f26fc-61f5-4b9a-9ce7-fbe226d2c4b9	FALSE	{'code': '61017', 'code (mapped)': 'haematology'}	345
229d77fb-d4cd-4ae7-8216-60b0ebbf43f5_dossier.i6z	NDA020838-candesartan cilexetil	145040-37-5	1-cyclohexyloxycarbonyloxyethyl 2-ethoxy-3-[[4-[2-(2H-tetrazol-5-yl)phenyl]phenyl]methyl]benzimidazole-4-carboxylate	v2	NDA020838	CARDIOVASCULAR SYSTEM	a5a28d5d-8005-401b-9e14-65a818f42c51	229d77fb-d4cd-4ae7-8216-60b0ebbf43f5	46161447	4d6676db-6268-43c0-82b1-66c52a0eac09	Carcinogenicity	61277	carcinogenicity: oral	1895	experimental study				{"AdministrativeData": {"Endpoint": {"code": "61277"}, "StudyResultType": {"code": "1895"}, "RobustStudy": false, "UsedForClassification": false, "UsedForMSDS": false}, "MaterialsAndMethods": {"TestMaterials": {"TestMaterialInformation": "0260d68a-deaa-4ec5-ac20-3470b5c643a3/a5a28d5d-8005-401b-9e14-65a818f42c51", "SpecificDetailsOnTestMaterialUsedForTheStudy": "Lot # M464-016"}, "TestAnimals": {"…	mouse	B6C3F1	oral: gavage	13 weeks	not specified	30.0 mg/kg bw/day (actual dose received), 300.0 mg/kg bw/day (actual dose received), 100.0 mg/kg bw/day (actual dose received), 10.0 mg/kg bw/day (actual dose received), None mg/kg bw/day (actual dose received)		Plasma urea nitrogen values for females in the 100 and 300 mg candesartan cilexetil/kg/day groups were elevated above control. Higher than control total protein was noted in females treated with 300 mg candesartan cilexetil/kg/day and higher than control levels of ALP were observed in the 300 mg/kg/day male group and in the 100 and 300 mg/kg/day female groups (Table 96).						Lower than control erythrocyte counts, hematocrit and hemoglobin concentrations were observed among all candesartan cilexetil-treated male groups. In female treated groups, these hematologic parameters tended to be lower than control but the differences were not dose-dependent and not statistically significant (Table 95).	Higher than control incidence of hyperplasia of the juxtaglomerular (JG) cells of the kidney was seen in males and females in each candesartan cilexetil treated group, and renal tubular basophilia was seen in males and females receiving 30 mg candesartan cilexetil/kg/day or more (Table 98).			Lower than control absolute and/or relative heart weights were observed in all treated male groups and in females in the 30, 100 and 300 mg candesartan cilexetil/kg/day groups (Table 97). Other organ weights among treated groups were comparable to control.					Results_x000D_ Mortality and Clinical Signs: No animals died during the study. No treatment-related clinical signs of toxicity were observed._x000D_ _x000D_ Body Weight. Body weights among candesartan cilexetil-treated animals were comparable to control. (Fig. 15, Table 93)._x000D_ _x000D_ _x000D_ _x000D_ _x000D_ _x000D_ _x000D_ Food Consumption: Food consumption among candesartan cilexetil-treat…			Results_x000D_ Mortality and Clinical Signs: No animals died during the study. No treatment-related clinical signs of toxicity were observed._x000D_ _x000D_ Body Weight. Body weights among candesartan cilexetil-treated animals were comparable to control. (Fig. 15, Table 93)._x000D_ _x000D_ _x000D_ _x000D_ _x000D_ _x000D_ _x000D_ Food Consumption: Food consumption among candesartan cilexetil-treat…	bb16cac0-e622-4ac1-bbf8-e10ea9692592	FALSE	{'code': '61017', 'code (mapped)': 'haematology'}	345
229d77fb-d4cd-4ae7-8216-60b0ebbf43f5_dossier.i6z	NDA020838-candesartan cilexetil	145040-37-5	1-cyclohexyloxycarbonyloxyethyl 2-ethoxy-3-[[4-[2-(2H-tetrazol-5-yl)phenyl]phenyl]methyl]benzimidazole-4-carboxylate	v2	NDA020838	CARDIOVASCULAR SYSTEM	a5a28d5d-8005-401b-9e14-65a818f42c51	229d77fb-d4cd-4ae7-8216-60b0ebbf43f5	46161447	4d6676db-6268-43c0-82b1-66c52a0eac09	Carcinogenicity	61277	carcinogenicity: oral	1895	experimental study				{"AdministrativeData": {"Endpoint": {"code": "61277"}, "StudyResultType": {"code": "1895"}, "RobustStudy": false, "UsedForClassification": false, "UsedForMSDS": false}, "MaterialsAndMethods": {"TestMaterials": {"TestMaterialInformation": "0260d68a-deaa-4ec5-ac20-3470b5c643a3/a5a28d5d-8005-401b-9e14-65a818f42c51", "SpecificDetailsOnTestMaterialUsedForTheStudy": "Lot # M464-016"}, "TestAnimals": {"…	mouse	B6C3F1	oral: gavage	13 weeks	not specified	30.0 mg/kg bw/day (actual dose received), 300.0 mg/kg bw/day (actual dose received), 100.0 mg/kg bw/day (actual dose received), 10.0 mg/kg bw/day (actual dose received), None mg/kg bw/day (actual dose received)		Plasma urea nitrogen values for females in the 100 and 300 mg candesartan cilexetil/kg/day groups were elevated above control. Higher than control total protein was noted in females treated with 300 mg candesartan cilexetil/kg/day and higher than control levels of ALP were observed in the 300 mg/kg/day male group and in the 100 and 300 mg/kg/day female groups (Table 96).						Lower than control erythrocyte counts, hematocrit and hemoglobin concentrations were observed among all candesartan cilexetil-treated male groups. In female treated groups, these hematologic parameters tended to be lower than control but the differences were not dose-dependent and not statistically significant (Table 95).	Higher than control incidence of hyperplasia of the juxtaglomerular (JG) cells of the kidney was seen in males and females in each candesartan cilexetil treated group, and renal tubular basophilia was seen in males and females receiving 30 mg candesartan cilexetil/kg/day or more (Table 98).			Lower than control absolute and/or relative heart weights were observed in all treated male groups and in females in the 30, 100 and 300 mg candesartan cilexetil/kg/day groups (Table 97). Other organ weights among treated groups were comparable to control.					Results_x000D_ Mortality and Clinical Signs: No animals died during the study. No treatment-related clinical signs of toxicity were observed._x000D_ _x000D_ Body Weight. Body weights among candesartan cilexetil-treated animals were comparable to control. (Fig. 15, Table 93)._x000D_ _x000D_ _x000D_ _x000D_ _x000D_ _x000D_ _x000D_ Food Consumption: Food consumption among candesartan cilexetil-treat…			Results_x000D_ Mortality and Clinical Signs: No animals died during the study. No treatment-related clinical signs of toxicity were observed._x000D_ _x000D_ Body Weight. Body weights among candesartan cilexetil-treated animals were comparable to control. (Fig. 15, Table 93)._x000D_ _x000D_ _x000D_ _x000D_ _x000D_ _x000D_ _x000D_ Food Consumption: Food consumption among candesartan cilexetil-treat…	c4bb52a0-8aa0-48ab-b03d-b82d8250b46f	FALSE	{'code': '61018', 'code (mapped)': 'clinical biochemistry'}	345
229d77fb-d4cd-4ae7-8216-60b0ebbf43f5_dossier.i6z	NDA020838-candesartan cilexetil	145040-37-5	1-cyclohexyloxycarbonyloxyethyl 2-ethoxy-3-[[4-[2-(2H-tetrazol-5-yl)phenyl]phenyl]methyl]benzimidazole-4-carboxylate	v2	NDA020838	CARDIOVASCULAR SYSTEM	a5a28d5d-8005-401b-9e14-65a818f42c51	229d77fb-d4cd-4ae7-8216-60b0ebbf43f5	46161447	4d6676db-6268-43c0-82b1-66c52a0eac09	Carcinogenicity	61277	carcinogenicity: oral	1895	experimental study				{"AdministrativeData": {"Endpoint": {"code": "61277"}, "StudyResultType": {"code": "1895"}, "RobustStudy": false, "UsedForClassification": false, "UsedForMSDS": false}, "MaterialsAndMethods": {"TestMaterials": {"TestMaterialInformation": "0260d68a-deaa-4ec5-ac20-3470b5c643a3/a5a28d5d-8005-401b-9e14-65a818f42c51", "SpecificDetailsOnTestMaterialUsedForTheStudy": "Lot # M464-016"}, "TestAnimals": {"…	mouse	B6C3F1	oral: gavage	13 weeks	not specified	30.0 mg/kg bw/day (actual dose received), 300.0 mg/kg bw/day (actual dose received), 100.0 mg/kg bw/day (actual dose received), 10.0 mg/kg bw/day (actual dose received), None mg/kg bw/day (actual dose received)		Plasma urea nitrogen values for females in the 100 and 300 mg candesartan cilexetil/kg/day groups were elevated above control. Higher than control total protein was noted in females treated with 300 mg candesartan cilexetil/kg/day and higher than control levels of ALP were observed in the 300 mg/kg/day male group and in the 100 and 300 mg/kg/day female groups (Table 96).						Lower than control erythrocyte counts, hematocrit and hemoglobin concentrations were observed among all candesartan cilexetil-treated male groups. In female treated groups, these hematologic parameters tended to be lower than control but the differences were not dose-dependent and not statistically significant (Table 95).	Higher than control incidence of hyperplasia of the juxtaglomerular (JG) cells of the kidney was seen in males and females in each candesartan cilexetil treated group, and renal tubular basophilia was seen in males and females receiving 30 mg candesartan cilexetil/kg/day or more (Table 98).			Lower than control absolute and/or relative heart weights were observed in all treated male groups and in females in the 30, 100 and 300 mg candesartan cilexetil/kg/day groups (Table 97). Other organ weights among treated groups were comparable to control.					Results_x000D_ Mortality and Clinical Signs: No animals died during the study. No treatment-related clinical signs of toxicity were observed._x000D_ _x000D_ Body Weight. Body weights among candesartan cilexetil-treated animals were comparable to control. (Fig. 15, Table 93)._x000D_ _x000D_ _x000D_ _x000D_ _x000D_ _x000D_ _x000D_ Food Consumption: Food consumption among candesartan cilexetil-treat…			Results_x000D_ Mortality and Clinical Signs: No animals died during the study. No treatment-related clinical signs of toxicity were observed._x000D_ _x000D_ Body Weight. Body weights among candesartan cilexetil-treated animals were comparable to control. (Fig. 15, Table 93)._x000D_ _x000D_ _x000D_ _x000D_ _x000D_ _x000D_ _x000D_ Food Consumption: Food consumption among candesartan cilexetil-treat…	ddc10b99-5e1b-4f99-801b-60be7e5408e5	FALSE	{'code': '61022', 'code (mapped)': 'organ weights and organ / body weight ratios'}	345
229d77fb-d4cd-4ae7-8216-60b0ebbf43f5_dossier.i6z	NDA020838-candesartan cilexetil	145040-37-5	1-cyclohexyloxycarbonyloxyethyl 2-ethoxy-3-[[4-[2-(2H-tetrazol-5-yl)phenyl]phenyl]methyl]benzimidazole-4-carboxylate	v2	NDA020838	CARDIOVASCULAR SYSTEM	a5a28d5d-8005-401b-9e14-65a818f42c51	229d77fb-d4cd-4ae7-8216-60b0ebbf43f5	46161447	4d6676db-6268-43c0-82b1-66c52a0eac09	Carcinogenicity	61277	carcinogenicity: oral	1895	experimental study				{"AdministrativeData": {"Endpoint": {"code": "61277"}, "StudyResultType": {"code": "1895"}, "RobustStudy": false, "UsedForClassification": false, "UsedForMSDS": false}, "MaterialsAndMethods": {"TestMaterials": {"TestMaterialInformation": "0260d68a-deaa-4ec5-ac20-3470b5c643a3/a5a28d5d-8005-401b-9e14-65a818f42c51", "SpecificDetailsOnTestMaterialUsedForTheStudy": "Lot # M464-016"}, "TestAnimals": {"…	mouse	B6C3F1	oral: gavage	13 weeks	not specified	30.0 mg/kg bw/day (actual dose received), 300.0 mg/kg bw/day (actual dose received), 100.0 mg/kg bw/day (actual dose received), 10.0 mg/kg bw/day (actual dose received), None mg/kg bw/day (actual dose received)		Plasma urea nitrogen values for females in the 100 and 300 mg candesartan cilexetil/kg/day groups were elevated above control. Higher than control total protein was noted in females treated with 300 mg candesartan cilexetil/kg/day and higher than control levels of ALP were observed in the 300 mg/kg/day male group and in the 100 and 300 mg/kg/day female groups (Table 96).						Lower than control erythrocyte counts, hematocrit and hemoglobin concentrations were observed among all candesartan cilexetil-treated male groups. In female treated groups, these hematologic parameters tended to be lower than control but the differences were not dose-dependent and not statistically significant (Table 95).	Higher than control incidence of hyperplasia of the juxtaglomerular (JG) cells of the kidney was seen in males and females in each candesartan cilexetil treated group, and renal tubular basophilia was seen in males and females receiving 30 mg candesartan cilexetil/kg/day or more (Table 98).			Lower than control absolute and/or relative heart weights were observed in all treated male groups and in females in the 30, 100 and 300 mg candesartan cilexetil/kg/day groups (Table 97). Other organ weights among treated groups were comparable to control.					Results_x000D_ Mortality and Clinical Signs: No animals died during the study. No treatment-related clinical signs of toxicity were observed._x000D_ _x000D_ Body Weight. Body weights among candesartan cilexetil-treated animals were comparable to control. (Fig. 15, Table 93)._x000D_ _x000D_ _x000D_ _x000D_ _x000D_ _x000D_ _x000D_ Food Consumption: Food consumption among candesartan cilexetil-treat…			Results_x000D_ Mortality and Clinical Signs: No animals died during the study. No treatment-related clinical signs of toxicity were observed._x000D_ _x000D_ Body Weight. Body weights among candesartan cilexetil-treated animals were comparable to control. (Fig. 15, Table 93)._x000D_ _x000D_ _x000D_ _x000D_ _x000D_ _x000D_ _x000D_ Food Consumption: Food consumption among candesartan cilexetil-treat…	ddc10b99-5e1b-4f99-801b-60be7e5408e5	FALSE	{'code': '61022', 'code (mapped)': 'organ weights and organ / body weight ratios'}	345
229d77fb-d4cd-4ae7-8216-60b0ebbf43f5_dossier.i6z	NDA020838-candesartan cilexetil	145040-37-5	1-cyclohexyloxycarbonyloxyethyl 2-ethoxy-3-[[4-[2-(2H-tetrazol-5-yl)phenyl]phenyl]methyl]benzimidazole-4-carboxylate	v2	NDA020838	CARDIOVASCULAR SYSTEM	a5a28d5d-8005-401b-9e14-65a818f42c51	229d77fb-d4cd-4ae7-8216-60b0ebbf43f5	46161447	4d6676db-6268-43c0-82b1-66c52a0eac09	Carcinogenicity	61277	carcinogenicity: oral	1895	experimental study				{"AdministrativeData": {"Endpoint": {"code": "61277"}, "StudyResultType": {"code": "1895"}, "RobustStudy": false, "UsedForClassification": false, "UsedForMSDS": false}, "MaterialsAndMethods": {"TestMaterials": {"TestMaterialInformation": "0260d68a-deaa-4ec5-ac20-3470b5c643a3/a5a28d5d-8005-401b-9e14-65a818f42c51", "SpecificDetailsOnTestMaterialUsedForTheStudy": "Lot # M464-016"}, "TestAnimals": {"…	mouse	B6C3F1	oral: gavage	13 weeks	not specified	30.0 mg/kg bw/day (actual dose received), 300.0 mg/kg bw/day (actual dose received), 100.0 mg/kg bw/day (actual dose received), 10.0 mg/kg bw/day (actual dose received), None mg/kg bw/day (actual dose received)		Plasma urea nitrogen values for females in the 100 and 300 mg candesartan cilexetil/kg/day groups were elevated above control. Higher than control total protein was noted in females treated with 300 mg candesartan cilexetil/kg/day and higher than control levels of ALP were observed in the 300 mg/kg/day male group and in the 100 and 300 mg/kg/day female groups (Table 96).						Lower than control erythrocyte counts, hematocrit and hemoglobin concentrations were observed among all candesartan cilexetil-treated male groups. In female treated groups, these hematologic parameters tended to be lower than control but the differences were not dose-dependent and not statistically significant (Table 95).	Higher than control incidence of hyperplasia of the juxtaglomerular (JG) cells of the kidney was seen in males and females in each candesartan cilexetil treated group, and renal tubular basophilia was seen in males and females receiving 30 mg candesartan cilexetil/kg/day or more (Table 98).			Lower than control absolute and/or relative heart weights were observed in all treated male groups and in females in the 30, 100 and 300 mg candesartan cilexetil/kg/day groups (Table 97). Other organ weights among treated groups were comparable to control.					Results_x000D_ Mortality and Clinical Signs: No animals died during the study. No treatment-related clinical signs of toxicity were observed._x000D_ _x000D_ Body Weight. Body weights among candesartan cilexetil-treated animals were comparable to control. (Fig. 15, Table 93)._x000D_ _x000D_ _x000D_ _x000D_ _x000D_ _x000D_ _x000D_ Food Consumption: Food consumption among candesartan cilexetil-treat…			Results_x000D_ Mortality and Clinical Signs: No animals died during the study. No treatment-related clinical signs of toxicity were observed._x000D_ _x000D_ Body Weight. Body weights among candesartan cilexetil-treated animals were comparable to control. (Fig. 15, Table 93)._x000D_ _x000D_ _x000D_ _x000D_ _x000D_ _x000D_ _x000D_ Food Consumption: Food consumption among candesartan cilexetil-treat…	e26f77ce-3b9a-4a05-b866-1ac4799aeeaf	FALSE	{'code': '61013', 'code (mapped)': 'food consumption and compound intake'}	1130
229d77fb-d4cd-4ae7-8216-60b0ebbf43f5_dossier.i6z	NDA020838-candesartan cilexetil	145040-37-5	1-cyclohexyloxycarbonyloxyethyl 2-ethoxy-3-[[4-[2-(2H-tetrazol-5-yl)phenyl]phenyl]methyl]benzimidazole-4-carboxylate	v2	NDA020838	CARDIOVASCULAR SYSTEM	a5a28d5d-8005-401b-9e14-65a818f42c51	229d77fb-d4cd-4ae7-8216-60b0ebbf43f5	46161447	4d6676db-6268-43c0-82b1-66c52a0eac09	Carcinogenicity	61277	carcinogenicity: oral	1895	experimental study				{"AdministrativeData": {"Endpoint": {"code": "61277"}, "StudyResultType": {"code": "1895"}, "RobustStudy": false, "UsedForClassification": false, "UsedForMSDS": false}, "MaterialsAndMethods": {"TestMaterials": {"TestMaterialInformation": "0260d68a-deaa-4ec5-ac20-3470b5c643a3/a5a28d5d-8005-401b-9e14-65a818f42c51", "SpecificDetailsOnTestMaterialUsedForTheStudy": "Lot # M464-016"}, "TestAnimals": {"…	mouse	B6C3F1	oral: gavage	13 weeks	not specified	30.0 mg/kg bw/day (actual dose received), 300.0 mg/kg bw/day (actual dose received), 100.0 mg/kg bw/day (actual dose received), 10.0 mg/kg bw/day (actual dose received), None mg/kg bw/day (actual dose received)		Plasma urea nitrogen values for females in the 100 and 300 mg candesartan cilexetil/kg/day groups were elevated above control. Higher than control total protein was noted in females treated with 300 mg candesartan cilexetil/kg/day and higher than control levels of ALP were observed in the 300 mg/kg/day male group and in the 100 and 300 mg/kg/day female groups (Table 96).						Lower than control erythrocyte counts, hematocrit and hemoglobin concentrations were observed among all candesartan cilexetil-treated male groups. In female treated groups, these hematologic parameters tended to be lower than control but the differences were not dose-dependent and not statistically significant (Table 95).	Higher than control incidence of hyperplasia of the juxtaglomerular (JG) cells of the kidney was seen in males and females in each candesartan cilexetil treated group, and renal tubular basophilia was seen in males and females receiving 30 mg candesartan cilexetil/kg/day or more (Table 98).			Lower than control absolute and/or relative heart weights were observed in all treated male groups and in females in the 30, 100 and 300 mg candesartan cilexetil/kg/day groups (Table 97). Other organ weights among treated groups were comparable to control.					Results_x000D_ Mortality and Clinical Signs: No animals died during the study. No treatment-related clinical signs of toxicity were observed._x000D_ _x000D_ Body Weight. Body weights among candesartan cilexetil-treated animals were comparable to control. (Fig. 15, Table 93)._x000D_ _x000D_ _x000D_ _x000D_ _x000D_ _x000D_ _x000D_ Food Consumption: Food consumption among candesartan cilexetil-treat…			Results_x000D_ Mortality and Clinical Signs: No animals died during the study. No treatment-related clinical signs of toxicity were observed._x000D_ _x000D_ Body Weight. Body weights among candesartan cilexetil-treated animals were comparable to control. (Fig. 15, Table 93)._x000D_ _x000D_ _x000D_ _x000D_ _x000D_ _x000D_ _x000D_ Food Consumption: Food consumption among candesartan cilexetil-treat…	ead86375-9029-4b0f-9df8-1ad0a5bb1ac8	FALSE	{'code': '61024', 'code (mapped)': 'neuropathology'}	345
229d77fb-d4cd-4ae7-8216-60b0ebbf43f5_dossier.i6z	NDA020838-candesartan cilexetil	145040-37-5	1-cyclohexyloxycarbonyloxyethyl 2-ethoxy-3-[[4-[2-(2H-tetrazol-5-yl)phenyl]phenyl]methyl]benzimidazole-4-carboxylate	v2	NDA020838	CARDIOVASCULAR SYSTEM	a5a28d5d-8005-401b-9e14-65a818f42c51	229d77fb-d4cd-4ae7-8216-60b0ebbf43f5	46161447	4d6676db-6268-43c0-82b1-66c52a0eac09	Carcinogenicity	61277	carcinogenicity: oral	1895	experimental study				{"AdministrativeData": {"Endpoint": {"code": "61277"}, "StudyResultType": {"code": "1895"}, "RobustStudy": false, "UsedForClassification": false, "UsedForMSDS": false}, "MaterialsAndMethods": {"TestMaterials": {"TestMaterialInformation": "0260d68a-deaa-4ec5-ac20-3470b5c643a3/a5a28d5d-8005-401b-9e14-65a818f42c51", "SpecificDetailsOnTestMaterialUsedForTheStudy": "Lot # M464-016"}, "TestAnimals": {"…	mouse	B6C3F1	oral: gavage	13 weeks	not specified	30.0 mg/kg bw/day (actual dose received), 300.0 mg/kg bw/day (actual dose received), 100.0 mg/kg bw/day (actual dose received), 10.0 mg/kg bw/day (actual dose received), None mg/kg bw/day (actual dose received)		Plasma urea nitrogen values for females in the 100 and 300 mg candesartan cilexetil/kg/day groups were elevated above control. Higher than control total protein was noted in females treated with 300 mg candesartan cilexetil/kg/day and higher than control levels of ALP were observed in the 300 mg/kg/day male group and in the 100 and 300 mg/kg/day female groups (Table 96).						Lower than control erythrocyte counts, hematocrit and hemoglobin concentrations were observed among all candesartan cilexetil-treated male groups. In female treated groups, these hematologic parameters tended to be lower than control but the differences were not dose-dependent and not statistically significant (Table 95).	Higher than control incidence of hyperplasia of the juxtaglomerular (JG) cells of the kidney was seen in males and females in each candesartan cilexetil treated group, and renal tubular basophilia was seen in males and females receiving 30 mg candesartan cilexetil/kg/day or more (Table 98).			Lower than control absolute and/or relative heart weights were observed in all treated male groups and in females in the 30, 100 and 300 mg candesartan cilexetil/kg/day groups (Table 97). Other organ weights among treated groups were comparable to control.					Results_x000D_ Mortality and Clinical Signs: No animals died during the study. No treatment-related clinical signs of toxicity were observed._x000D_ _x000D_ Body Weight. Body weights among candesartan cilexetil-treated animals were comparable to control. (Fig. 15, Table 93)._x000D_ _x000D_ _x000D_ _x000D_ _x000D_ _x000D_ _x000D_ Food Consumption: Food consumption among candesartan cilexetil-treat…			Results_x000D_ Mortality and Clinical Signs: No animals died during the study. No treatment-related clinical signs of toxicity were observed._x000D_ _x000D_ Body Weight. Body weights among candesartan cilexetil-treated animals were comparable to control. (Fig. 15, Table 93)._x000D_ _x000D_ _x000D_ _x000D_ _x000D_ _x000D_ _x000D_ Food Consumption: Food consumption among candesartan cilexetil-treat…	ead86375-9029-4b0f-9df8-1ad0a5bb1ac8	FALSE	{'code': '61024', 'code (mapped)': 'neuropathology'}	345
229d77fb-d4cd-4ae7-8216-60b0ebbf43f5_dossier.i6z	NDA020838-candesartan cilexetil	145040-37-5	1-cyclohexyloxycarbonyloxyethyl 2-ethoxy-3-[[4-[2-(2H-tetrazol-5-yl)phenyl]phenyl]methyl]benzimidazole-4-carboxylate	v2	NDA020838	CARDIOVASCULAR SYSTEM	a5a28d5d-8005-401b-9e14-65a818f42c51	229d77fb-d4cd-4ae7-8216-60b0ebbf43f5	46161440	90aae7e9-43dd-4c14-b877-e99f3ed797f4	Carcinogenicity	61277	carcinogenicity: oral	1895	experimental study				{"AdministrativeData": {"Endpoint": {"code": "61277"}, "StudyResultType": {"code": "1895"}, "RobustStudy": false, "UsedForClassification": false, "UsedForMSDS": false}, "MaterialsAndMethods": {"TestMaterials": {"TestMaterialInformation": "0260d68a-deaa-4ec5-ac20-3470b5c643a3/a5a28d5d-8005-401b-9e14-65a818f42c51", "SpecificDetailsOnTestMaterialUsedForTheStudy": "Lot#M464-013,-104, -015, -016, -017…	rat	other:F344/Jcl	oral: feed	24 months	not specified	None mg/kg bw/day (actual dose received), 300.0 mg/kg bw/day (actual dose received), 100.0 mg/kg bw/day (actual dose received), 1000.0 mg/kg bw/day (actual dose received)	Significantly lower than control body weights and body weight gains were noted for males in all treatment groups beginning week 1 of the dosing period (Table 82; Fig. 14). The body weight effects were dose-dependent and maximal around weeks 70-78 of the study; by study termination, body weights among treated male groups were comparable to control. For female rats, there was a lower than control b…				Significantly lower than control food consumption was noted for males in all treatment groups throughout the first 74 weeks of the study; by week 78, only the mid dose and high dose males showed significantly lower than control food consumption. Food consumption by candesartan cilexetil-treated females was comparable to control throughout most of the study (Table 83).		Higher than control incidences of an enlarged spleen and a rough kidney surface were noted in high dose males'(Table 86). The incidences of all other macroscopic lesions were comparable among control and treated groups.	Slight and non-dose-related, but significantly lower than control numbers of platelets were noted in males in all the treatment groups. Slight and non-significantly lower than control erythroid values were noted in females treated with 100 mg candesartan cilexetil/kg/day (Table 85).	Increase above control incidences of juxtaglomerular cell hypertrophy and intimal proliferation in the interlobular arteries of the kidney were observed in candesartan cilexetil- treated groups. Also, increases above control incidence and severity of atrophy of zona glomerulosa cells in the adrenal glands were observed in candesartan-treated rats of both sexes from all treated groups (91). The in…	The sponsor’s analysis revealed that the numbers of tumor-bearing animals and total primary neoplasms including benign, malignant and hematopoietic neoplasms were not significantly affected by candesartan cilexetil treatment (Table 87)._x000D_ _x000D_ In female rats treated with candesartan cilexetil, the incidence of pheochromocytoma (benign), showed a positive trend (p= 0.044) and there were st…						Forty-six male rats and 44 female rats died or were killed in extremis during the course of the study. There were no significant differences in survival rates among the control and treated groups of either sex (Table 81, Fig 13).	Body Weight: Significantly lower than control body weights and body weight gains were noted for males in all treatment groups beginning week 1 of the dosing period (Table 82; Fig. 14). The body weight effects were dose-dependent and maximal around weeks 70-78 of the study; by study termination, body weights among treated male groups were comparable to control. For female rats, there was a lower t…			Body Weight: Significantly lower than control body weights and body weight gains were noted for males in all treatment groups beginning week 1 of the dosing period (Table 82; Fig. 14). The body weight effects were dose-dependent and maximal around weeks 70-78 of the study; by study termination, body weights among treated male groups were comparable to control. For female rats, there was a lower t…	02bfb6bd-c48f-4d28-bb7b-ba1bb260c810	FALSE	{'code': '61023', 'code (mapped)': 'gross pathology'}	345
229d77fb-d4cd-4ae7-8216-60b0ebbf43f5_dossier.i6z	NDA020838-candesartan cilexetil	145040-37-5	1-cyclohexyloxycarbonyloxyethyl 2-ethoxy-3-[[4-[2-(2H-tetrazol-5-yl)phenyl]phenyl]methyl]benzimidazole-4-carboxylate	v2	NDA020838	CARDIOVASCULAR SYSTEM	a5a28d5d-8005-401b-9e14-65a818f42c51	229d77fb-d4cd-4ae7-8216-60b0ebbf43f5	46161440	90aae7e9-43dd-4c14-b877-e99f3ed797f4	Carcinogenicity	61277	carcinogenicity: oral	1895	experimental study				{"AdministrativeData": {"Endpoint": {"code": "61277"}, "StudyResultType": {"code": "1895"}, "RobustStudy": false, "UsedForClassification": false, "UsedForMSDS": false}, "MaterialsAndMethods": {"TestMaterials": {"TestMaterialInformation": "0260d68a-deaa-4ec5-ac20-3470b5c643a3/a5a28d5d-8005-401b-9e14-65a818f42c51", "SpecificDetailsOnTestMaterialUsedForTheStudy": "Lot#M464-013,-104, -015, -016, -017…	rat	other:F344/Jcl	oral: feed	24 months	not specified	None mg/kg bw/day (actual dose received), 300.0 mg/kg bw/day (actual dose received), 100.0 mg/kg bw/day (actual dose received), 1000.0 mg/kg bw/day (actual dose received)	Significantly lower than control body weights and body weight gains were noted for males in all treatment groups beginning week 1 of the dosing period (Table 82; Fig. 14). The body weight effects were dose-dependent and maximal around weeks 70-78 of the study; by study termination, body weights among treated male groups were comparable to control. For female rats, there was a lower than control b…				Significantly lower than control food consumption was noted for males in all treatment groups throughout the first 74 weeks of the study; by week 78, only the mid dose and high dose males showed significantly lower than control food consumption. Food consumption by candesartan cilexetil-treated females was comparable to control throughout most of the study (Table 83).		Higher than control incidences of an enlarged spleen and a rough kidney surface were noted in high dose males'(Table 86). The incidences of all other macroscopic lesions were comparable among control and treated groups.	Slight and non-dose-related, but significantly lower than control numbers of platelets were noted in males in all the treatment groups. Slight and non-significantly lower than control erythroid values were noted in females treated with 100 mg candesartan cilexetil/kg/day (Table 85).	Increase above control incidences of juxtaglomerular cell hypertrophy and intimal proliferation in the interlobular arteries of the kidney were observed in candesartan cilexetil- treated groups. Also, increases above control incidence and severity of atrophy of zona glomerulosa cells in the adrenal glands were observed in candesartan-treated rats of both sexes from all treated groups (91). The in…	The sponsor’s analysis revealed that the numbers of tumor-bearing animals and total primary neoplasms including benign, malignant and hematopoietic neoplasms were not significantly affected by candesartan cilexetil treatment (Table 87)._x000D_ _x000D_ In female rats treated with candesartan cilexetil, the incidence of pheochromocytoma (benign), showed a positive trend (p= 0.044) and there were st…						Forty-six male rats and 44 female rats died or were killed in extremis during the course of the study. There were no significant differences in survival rates among the control and treated groups of either sex (Table 81, Fig 13).	Body Weight: Significantly lower than control body weights and body weight gains were noted for males in all treatment groups beginning week 1 of the dosing period (Table 82; Fig. 14). The body weight effects were dose-dependent and maximal around weeks 70-78 of the study; by study termination, body weights among treated male groups were comparable to control. For female rats, there was a lower t…			Body Weight: Significantly lower than control body weights and body weight gains were noted for males in all treatment groups beginning week 1 of the dosing period (Table 82; Fig. 14). The body weight effects were dose-dependent and maximal around weeks 70-78 of the study; by study termination, body weights among treated male groups were comparable to control. For female rats, there was a lower t…	105a3219-a9a5-440a-98e9-2ae972b673f0	FALSE	{'code': '61012', 'code (mapped)': 'body weight and weight gain'}	345
229d77fb-d4cd-4ae7-8216-60b0ebbf43f5_dossier.i6z	NDA020838-candesartan cilexetil	145040-37-5	1-cyclohexyloxycarbonyloxyethyl 2-ethoxy-3-[[4-[2-(2H-tetrazol-5-yl)phenyl]phenyl]methyl]benzimidazole-4-carboxylate	v2	NDA020838	CARDIOVASCULAR SYSTEM	a5a28d5d-8005-401b-9e14-65a818f42c51	229d77fb-d4cd-4ae7-8216-60b0ebbf43f5	46161440	90aae7e9-43dd-4c14-b877-e99f3ed797f4	Carcinogenicity	61277	carcinogenicity: oral	1895	experimental study				{"AdministrativeData": {"Endpoint": {"code": "61277"}, "StudyResultType": {"code": "1895"}, "RobustStudy": false, "UsedForClassification": false, "UsedForMSDS": false}, "MaterialsAndMethods": {"TestMaterials": {"TestMaterialInformation": "0260d68a-deaa-4ec5-ac20-3470b5c643a3/a5a28d5d-8005-401b-9e14-65a818f42c51", "SpecificDetailsOnTestMaterialUsedForTheStudy": "Lot#M464-013,-104, -015, -016, -017…	rat	other:F344/Jcl	oral: feed	24 months	not specified	None mg/kg bw/day (actual dose received), 300.0 mg/kg bw/day (actual dose received), 100.0 mg/kg bw/day (actual dose received), 1000.0 mg/kg bw/day (actual dose received)	Significantly lower than control body weights and body weight gains were noted for males in all treatment groups beginning week 1 of the dosing period (Table 82; Fig. 14). The body weight effects were dose-dependent and maximal around weeks 70-78 of the study; by study termination, body weights among treated male groups were comparable to control. For female rats, there was a lower than control b…				Significantly lower than control food consumption was noted for males in all treatment groups throughout the first 74 weeks of the study; by week 78, only the mid dose and high dose males showed significantly lower than control food consumption. Food consumption by candesartan cilexetil-treated females was comparable to control throughout most of the study (Table 83).		Higher than control incidences of an enlarged spleen and a rough kidney surface were noted in high dose males'(Table 86). The incidences of all other macroscopic lesions were comparable among control and treated groups.	Slight and non-dose-related, but significantly lower than control numbers of platelets were noted in males in all the treatment groups. Slight and non-significantly lower than control erythroid values were noted in females treated with 100 mg candesartan cilexetil/kg/day (Table 85).	Increase above control incidences of juxtaglomerular cell hypertrophy and intimal proliferation in the interlobular arteries of the kidney were observed in candesartan cilexetil- treated groups. Also, increases above control incidence and severity of atrophy of zona glomerulosa cells in the adrenal glands were observed in candesartan-treated rats of both sexes from all treated groups (91). The in…	The sponsor’s analysis revealed that the numbers of tumor-bearing animals and total primary neoplasms including benign, malignant and hematopoietic neoplasms were not significantly affected by candesartan cilexetil treatment (Table 87)._x000D_ _x000D_ In female rats treated with candesartan cilexetil, the incidence of pheochromocytoma (benign), showed a positive trend (p= 0.044) and there were st…						Forty-six male rats and 44 female rats died or were killed in extremis during the course of the study. There were no significant differences in survival rates among the control and treated groups of either sex (Table 81, Fig 13).	Body Weight: Significantly lower than control body weights and body weight gains were noted for males in all treatment groups beginning week 1 of the dosing period (Table 82; Fig. 14). The body weight effects were dose-dependent and maximal around weeks 70-78 of the study; by study termination, body weights among treated male groups were comparable to control. For female rats, there was a lower t…			Body Weight: Significantly lower than control body weights and body weight gains were noted for males in all treatment groups beginning week 1 of the dosing period (Table 82; Fig. 14). The body weight effects were dose-dependent and maximal around weeks 70-78 of the study; by study termination, body weights among treated male groups were comparable to control. For female rats, there was a lower t…	105a3219-a9a5-440a-98e9-2ae972b673f0	FALSE	{'code': '61012', 'code (mapped)': 'body weight and weight gain'}	345
229d77fb-d4cd-4ae7-8216-60b0ebbf43f5_dossier.i6z	NDA020838-candesartan cilexetil	145040-37-5	1-cyclohexyloxycarbonyloxyethyl 2-ethoxy-3-[[4-[2-(2H-tetrazol-5-yl)phenyl]phenyl]methyl]benzimidazole-4-carboxylate	v2	NDA020838	CARDIOVASCULAR SYSTEM	a5a28d5d-8005-401b-9e14-65a818f42c51	229d77fb-d4cd-4ae7-8216-60b0ebbf43f5	46161440	90aae7e9-43dd-4c14-b877-e99f3ed797f4	Carcinogenicity	61277	carcinogenicity: oral	1895	experimental study				{"AdministrativeData": {"Endpoint": {"code": "61277"}, "StudyResultType": {"code": "1895"}, "RobustStudy": false, "UsedForClassification": false, "UsedForMSDS": false}, "MaterialsAndMethods": {"TestMaterials": {"TestMaterialInformation": "0260d68a-deaa-4ec5-ac20-3470b5c643a3/a5a28d5d-8005-401b-9e14-65a818f42c51", "SpecificDetailsOnTestMaterialUsedForTheStudy": "Lot#M464-013,-104, -015, -016, -017…	rat	other:F344/Jcl	oral: feed	24 months	not specified	None mg/kg bw/day (actual dose received), 300.0 mg/kg bw/day (actual dose received), 100.0 mg/kg bw/day (actual dose received), 1000.0 mg/kg bw/day (actual dose received)	Significantly lower than control body weights and body weight gains were noted for males in all treatment groups beginning week 1 of the dosing period (Table 82; Fig. 14). The body weight effects were dose-dependent and maximal around weeks 70-78 of the study; by study termination, body weights among treated male groups were comparable to control. For female rats, there was a lower than control b…				Significantly lower than control food consumption was noted for males in all treatment groups throughout the first 74 weeks of the study; by week 78, only the mid dose and high dose males showed significantly lower than control food consumption. Food consumption by candesartan cilexetil-treated females was comparable to control throughout most of the study (Table 83).		Higher than control incidences of an enlarged spleen and a rough kidney surface were noted in high dose males'(Table 86). The incidences of all other macroscopic lesions were comparable among control and treated groups.	Slight and non-dose-related, but significantly lower than control numbers of platelets were noted in males in all the treatment groups. Slight and non-significantly lower than control erythroid values were noted in females treated with 100 mg candesartan cilexetil/kg/day (Table 85).	Increase above control incidences of juxtaglomerular cell hypertrophy and intimal proliferation in the interlobular arteries of the kidney were observed in candesartan cilexetil- treated groups. Also, increases above control incidence and severity of atrophy of zona glomerulosa cells in the adrenal glands were observed in candesartan-treated rats of both sexes from all treated groups (91). The in…	The sponsor’s analysis revealed that the numbers of tumor-bearing animals and total primary neoplasms including benign, malignant and hematopoietic neoplasms were not significantly affected by candesartan cilexetil treatment (Table 87)._x000D_ _x000D_ In female rats treated with candesartan cilexetil, the incidence of pheochromocytoma (benign), showed a positive trend (p= 0.044) and there were st…						Forty-six male rats and 44 female rats died or were killed in extremis during the course of the study. There were no significant differences in survival rates among the control and treated groups of either sex (Table 81, Fig 13).	Body Weight: Significantly lower than control body weights and body weight gains were noted for males in all treatment groups beginning week 1 of the dosing period (Table 82; Fig. 14). The body weight effects were dose-dependent and maximal around weeks 70-78 of the study; by study termination, body weights among treated male groups were comparable to control. For female rats, there was a lower t…			Body Weight: Significantly lower than control body weights and body weight gains were noted for males in all treatment groups beginning week 1 of the dosing period (Table 82; Fig. 14). The body weight effects were dose-dependent and maximal around weeks 70-78 of the study; by study termination, body weights among treated male groups were comparable to control. For female rats, there was a lower t…	105a3219-a9a5-440a-98e9-2ae972b673f0	FALSE	{'code': '61012', 'code (mapped)': 'body weight and weight gain'}	345
229d77fb-d4cd-4ae7-8216-60b0ebbf43f5_dossier.i6z	NDA020838-candesartan cilexetil	145040-37-5	1-cyclohexyloxycarbonyloxyethyl 2-ethoxy-3-[[4-[2-(2H-tetrazol-5-yl)phenyl]phenyl]methyl]benzimidazole-4-carboxylate	v2	NDA020838	CARDIOVASCULAR SYSTEM	a5a28d5d-8005-401b-9e14-65a818f42c51	229d77fb-d4cd-4ae7-8216-60b0ebbf43f5	46161440	90aae7e9-43dd-4c14-b877-e99f3ed797f4	Carcinogenicity	61277	carcinogenicity: oral	1895	experimental study				{"AdministrativeData": {"Endpoint": {"code": "61277"}, "StudyResultType": {"code": "1895"}, "RobustStudy": false, "UsedForClassification": false, "UsedForMSDS": false}, "MaterialsAndMethods": {"TestMaterials": {"TestMaterialInformation": "0260d68a-deaa-4ec5-ac20-3470b5c643a3/a5a28d5d-8005-401b-9e14-65a818f42c51", "SpecificDetailsOnTestMaterialUsedForTheStudy": "Lot#M464-013,-104, -015, -016, -017…	rat	other:F344/Jcl	oral: feed	24 months	not specified	None mg/kg bw/day (actual dose received), 300.0 mg/kg bw/day (actual dose received), 100.0 mg/kg bw/day (actual dose received), 1000.0 mg/kg bw/day (actual dose received)	Significantly lower than control body weights and body weight gains were noted for males in all treatment groups beginning week 1 of the dosing period (Table 82; Fig. 14). The body weight effects were dose-dependent and maximal around weeks 70-78 of the study; by study termination, body weights among treated male groups were comparable to control. For female rats, there was a lower than control b…				Significantly lower than control food consumption was noted for males in all treatment groups throughout the first 74 weeks of the study; by week 78, only the mid dose and high dose males showed significantly lower than control food consumption. Food consumption by candesartan cilexetil-treated females was comparable to control throughout most of the study (Table 83).		Higher than control incidences of an enlarged spleen and a rough kidney surface were noted in high dose males'(Table 86). The incidences of all other macroscopic lesions were comparable among control and treated groups.	Slight and non-dose-related, but significantly lower than control numbers of platelets were noted in males in all the treatment groups. Slight and non-significantly lower than control erythroid values were noted in females treated with 100 mg candesartan cilexetil/kg/day (Table 85).	Increase above control incidences of juxtaglomerular cell hypertrophy and intimal proliferation in the interlobular arteries of the kidney were observed in candesartan cilexetil- treated groups. Also, increases above control incidence and severity of atrophy of zona glomerulosa cells in the adrenal glands were observed in candesartan-treated rats of both sexes from all treated groups (91). The in…	The sponsor’s analysis revealed that the numbers of tumor-bearing animals and total primary neoplasms including benign, malignant and hematopoietic neoplasms were not significantly affected by candesartan cilexetil treatment (Table 87)._x000D_ _x000D_ In female rats treated with candesartan cilexetil, the incidence of pheochromocytoma (benign), showed a positive trend (p= 0.044) and there were st…						Forty-six male rats and 44 female rats died or were killed in extremis during the course of the study. There were no significant differences in survival rates among the control and treated groups of either sex (Table 81, Fig 13).	Body Weight: Significantly lower than control body weights and body weight gains were noted for males in all treatment groups beginning week 1 of the dosing period (Table 82; Fig. 14). The body weight effects were dose-dependent and maximal around weeks 70-78 of the study; by study termination, body weights among treated male groups were comparable to control. For female rats, there was a lower t…			Body Weight: Significantly lower than control body weights and body weight gains were noted for males in all treatment groups beginning week 1 of the dosing period (Table 82; Fig. 14). The body weight effects were dose-dependent and maximal around weeks 70-78 of the study; by study termination, body weights among treated male groups were comparable to control. For female rats, there was a lower t…	1c21bbe8-3e1c-40b0-bdcb-67bdda69840d	FALSE	{'code': '61013', 'code (mapped)': 'food consumption and compound intake'}	345
229d77fb-d4cd-4ae7-8216-60b0ebbf43f5_dossier.i6z	NDA020838-candesartan cilexetil	145040-37-5	1-cyclohexyloxycarbonyloxyethyl 2-ethoxy-3-[[4-[2-(2H-tetrazol-5-yl)phenyl]phenyl]methyl]benzimidazole-4-carboxylate	v2	NDA020838	CARDIOVASCULAR SYSTEM	a5a28d5d-8005-401b-9e14-65a818f42c51	229d77fb-d4cd-4ae7-8216-60b0ebbf43f5	46161440	90aae7e9-43dd-4c14-b877-e99f3ed797f4	Carcinogenicity	61277	carcinogenicity: oral	1895	experimental study				{"AdministrativeData": {"Endpoint": {"code": "61277"}, "StudyResultType": {"code": "1895"}, "RobustStudy": false, "UsedForClassification": false, "UsedForMSDS": false}, "MaterialsAndMethods": {"TestMaterials": {"TestMaterialInformation": "0260d68a-deaa-4ec5-ac20-3470b5c643a3/a5a28d5d-8005-401b-9e14-65a818f42c51", "SpecificDetailsOnTestMaterialUsedForTheStudy": "Lot#M464-013,-104, -015, -016, -017…	rat	other:F344/Jcl	oral: feed	24 months	not specified	None mg/kg bw/day (actual dose received), 300.0 mg/kg bw/day (actual dose received), 100.0 mg/kg bw/day (actual dose received), 1000.0 mg/kg bw/day (actual dose received)	Significantly lower than control body weights and body weight gains were noted for males in all treatment groups beginning week 1 of the dosing period (Table 82; Fig. 14). The body weight effects were dose-dependent and maximal around weeks 70-78 of the study; by study termination, body weights among treated male groups were comparable to control. For female rats, there was a lower than control b…				Significantly lower than control food consumption was noted for males in all treatment groups throughout the first 74 weeks of the study; by week 78, only the mid dose and high dose males showed significantly lower than control food consumption. Food consumption by candesartan cilexetil-treated females was comparable to control throughout most of the study (Table 83).		Higher than control incidences of an enlarged spleen and a rough kidney surface were noted in high dose males'(Table 86). The incidences of all other macroscopic lesions were comparable among control and treated groups.	Slight and non-dose-related, but significantly lower than control numbers of platelets were noted in males in all the treatment groups. Slight and non-significantly lower than control erythroid values were noted in females treated with 100 mg candesartan cilexetil/kg/day (Table 85).	Increase above control incidences of juxtaglomerular cell hypertrophy and intimal proliferation in the interlobular arteries of the kidney were observed in candesartan cilexetil- treated groups. Also, increases above control incidence and severity of atrophy of zona glomerulosa cells in the adrenal glands were observed in candesartan-treated rats of both sexes from all treated groups (91). The in…	The sponsor’s analysis revealed that the numbers of tumor-bearing animals and total primary neoplasms including benign, malignant and hematopoietic neoplasms were not significantly affected by candesartan cilexetil treatment (Table 87)._x000D_ _x000D_ In female rats treated with candesartan cilexetil, the incidence of pheochromocytoma (benign), showed a positive trend (p= 0.044) and there were st…						Forty-six male rats and 44 female rats died or were killed in extremis during the course of the study. There were no significant differences in survival rates among the control and treated groups of either sex (Table 81, Fig 13).	Body Weight: Significantly lower than control body weights and body weight gains were noted for males in all treatment groups beginning week 1 of the dosing period (Table 82; Fig. 14). The body weight effects were dose-dependent and maximal around weeks 70-78 of the study; by study termination, body weights among treated male groups were comparable to control. For female rats, there was a lower t…			Body Weight: Significantly lower than control body weights and body weight gains were noted for males in all treatment groups beginning week 1 of the dosing period (Table 82; Fig. 14). The body weight effects were dose-dependent and maximal around weeks 70-78 of the study; by study termination, body weights among treated male groups were comparable to control. For female rats, there was a lower t…	56e96e10-89ae-434b-9bf5-c9642c37f5e9	FALSE	{'code': '61012', 'code (mapped)': 'body weight and weight gain'}	345
229d77fb-d4cd-4ae7-8216-60b0ebbf43f5_dossier.i6z	NDA020838-candesartan cilexetil	145040-37-5	1-cyclohexyloxycarbonyloxyethyl 2-ethoxy-3-[[4-[2-(2H-tetrazol-5-yl)phenyl]phenyl]methyl]benzimidazole-4-carboxylate	v2	NDA020838	CARDIOVASCULAR SYSTEM	a5a28d5d-8005-401b-9e14-65a818f42c51	229d77fb-d4cd-4ae7-8216-60b0ebbf43f5	46161440	90aae7e9-43dd-4c14-b877-e99f3ed797f4	Carcinogenicity	61277	carcinogenicity: oral	1895	experimental study				{"AdministrativeData": {"Endpoint": {"code": "61277"}, "StudyResultType": {"code": "1895"}, "RobustStudy": false, "UsedForClassification": false, "UsedForMSDS": false}, "MaterialsAndMethods": {"TestMaterials": {"TestMaterialInformation": "0260d68a-deaa-4ec5-ac20-3470b5c643a3/a5a28d5d-8005-401b-9e14-65a818f42c51", "SpecificDetailsOnTestMaterialUsedForTheStudy": "Lot#M464-013,-104, -015, -016, -017…	rat	other:F344/Jcl	oral: feed	24 months	not specified	None mg/kg bw/day (actual dose received), 300.0 mg/kg bw/day (actual dose received), 100.0 mg/kg bw/day (actual dose received), 1000.0 mg/kg bw/day (actual dose received)	Significantly lower than control body weights and body weight gains were noted for males in all treatment groups beginning week 1 of the dosing period (Table 82; Fig. 14). The body weight effects were dose-dependent and maximal around weeks 70-78 of the study; by study termination, body weights among treated male groups were comparable to control. For female rats, there was a lower than control b…				Significantly lower than control food consumption was noted for males in all treatment groups throughout the first 74 weeks of the study; by week 78, only the mid dose and high dose males showed significantly lower than control food consumption. Food consumption by candesartan cilexetil-treated females was comparable to control throughout most of the study (Table 83).		Higher than control incidences of an enlarged spleen and a rough kidney surface were noted in high dose males'(Table 86). The incidences of all other macroscopic lesions were comparable among control and treated groups.	Slight and non-dose-related, but significantly lower than control numbers of platelets were noted in males in all the treatment groups. Slight and non-significantly lower than control erythroid values were noted in females treated with 100 mg candesartan cilexetil/kg/day (Table 85).	Increase above control incidences of juxtaglomerular cell hypertrophy and intimal proliferation in the interlobular arteries of the kidney were observed in candesartan cilexetil- treated groups. Also, increases above control incidence and severity of atrophy of zona glomerulosa cells in the adrenal glands were observed in candesartan-treated rats of both sexes from all treated groups (91). The in…	The sponsor’s analysis revealed that the numbers of tumor-bearing animals and total primary neoplasms including benign, malignant and hematopoietic neoplasms were not significantly affected by candesartan cilexetil treatment (Table 87)._x000D_ _x000D_ In female rats treated with candesartan cilexetil, the incidence of pheochromocytoma (benign), showed a positive trend (p= 0.044) and there were st…						Forty-six male rats and 44 female rats died or were killed in extremis during the course of the study. There were no significant differences in survival rates among the control and treated groups of either sex (Table 81, Fig 13).	Body Weight: Significantly lower than control body weights and body weight gains were noted for males in all treatment groups beginning week 1 of the dosing period (Table 82; Fig. 14). The body weight effects were dose-dependent and maximal around weeks 70-78 of the study; by study termination, body weights among treated male groups were comparable to control. For female rats, there was a lower t…			Body Weight: Significantly lower than control body weights and body weight gains were noted for males in all treatment groups beginning week 1 of the dosing period (Table 82; Fig. 14). The body weight effects were dose-dependent and maximal around weeks 70-78 of the study; by study termination, body weights among treated male groups were comparable to control. For female rats, there was a lower t…	56e96e10-89ae-434b-9bf5-c9642c37f5e9	FALSE	{'code': '61012', 'code (mapped)': 'body weight and weight gain'}	345
229d77fb-d4cd-4ae7-8216-60b0ebbf43f5_dossier.i6z	NDA020838-candesartan cilexetil	145040-37-5	1-cyclohexyloxycarbonyloxyethyl 2-ethoxy-3-[[4-[2-(2H-tetrazol-5-yl)phenyl]phenyl]methyl]benzimidazole-4-carboxylate	v2	NDA020838	CARDIOVASCULAR SYSTEM	a5a28d5d-8005-401b-9e14-65a818f42c51	229d77fb-d4cd-4ae7-8216-60b0ebbf43f5	46161440	90aae7e9-43dd-4c14-b877-e99f3ed797f4	Carcinogenicity	61277	carcinogenicity: oral	1895	experimental study				{"AdministrativeData": {"Endpoint": {"code": "61277"}, "StudyResultType": {"code": "1895"}, "RobustStudy": false, "UsedForClassification": false, "UsedForMSDS": false}, "MaterialsAndMethods": {"TestMaterials": {"TestMaterialInformation": "0260d68a-deaa-4ec5-ac20-3470b5c643a3/a5a28d5d-8005-401b-9e14-65a818f42c51", "SpecificDetailsOnTestMaterialUsedForTheStudy": "Lot#M464-013,-104, -015, -016, -017…	rat	other:F344/Jcl	oral: feed	24 months	not specified	None mg/kg bw/day (actual dose received), 300.0 mg/kg bw/day (actual dose received), 100.0 mg/kg bw/day (actual dose received), 1000.0 mg/kg bw/day (actual dose received)	Significantly lower than control body weights and body weight gains were noted for males in all treatment groups beginning week 1 of the dosing period (Table 82; Fig. 14). The body weight effects were dose-dependent and maximal around weeks 70-78 of the study; by study termination, body weights among treated male groups were comparable to control. For female rats, there was a lower than control b…				Significantly lower than control food consumption was noted for males in all treatment groups throughout the first 74 weeks of the study; by week 78, only the mid dose and high dose males showed significantly lower than control food consumption. Food consumption by candesartan cilexetil-treated females was comparable to control throughout most of the study (Table 83).		Higher than control incidences of an enlarged spleen and a rough kidney surface were noted in high dose males'(Table 86). The incidences of all other macroscopic lesions were comparable among control and treated groups.	Slight and non-dose-related, but significantly lower than control numbers of platelets were noted in males in all the treatment groups. Slight and non-significantly lower than control erythroid values were noted in females treated with 100 mg candesartan cilexetil/kg/day (Table 85).	Increase above control incidences of juxtaglomerular cell hypertrophy and intimal proliferation in the interlobular arteries of the kidney were observed in candesartan cilexetil- treated groups. Also, increases above control incidence and severity of atrophy of zona glomerulosa cells in the adrenal glands were observed in candesartan-treated rats of both sexes from all treated groups (91). The in…	The sponsor’s analysis revealed that the numbers of tumor-bearing animals and total primary neoplasms including benign, malignant and hematopoietic neoplasms were not significantly affected by candesartan cilexetil treatment (Table 87)._x000D_ _x000D_ In female rats treated with candesartan cilexetil, the incidence of pheochromocytoma (benign), showed a positive trend (p= 0.044) and there were st…						Forty-six male rats and 44 female rats died or were killed in extremis during the course of the study. There were no significant differences in survival rates among the control and treated groups of either sex (Table 81, Fig 13).	Body Weight: Significantly lower than control body weights and body weight gains were noted for males in all treatment groups beginning week 1 of the dosing period (Table 82; Fig. 14). The body weight effects were dose-dependent and maximal around weeks 70-78 of the study; by study termination, body weights among treated male groups were comparable to control. For female rats, there was a lower t…			Body Weight: Significantly lower than control body weights and body weight gains were noted for males in all treatment groups beginning week 1 of the dosing period (Table 82; Fig. 14). The body weight effects were dose-dependent and maximal around weeks 70-78 of the study; by study termination, body weights among treated male groups were comparable to control. For female rats, there was a lower t…	56e96e10-89ae-434b-9bf5-c9642c37f5e9	FALSE	{'code': '61012', 'code (mapped)': 'body weight and weight gain'}	345
229d77fb-d4cd-4ae7-8216-60b0ebbf43f5_dossier.i6z	NDA020838-candesartan cilexetil	145040-37-5	1-cyclohexyloxycarbonyloxyethyl 2-ethoxy-3-[[4-[2-(2H-tetrazol-5-yl)phenyl]phenyl]methyl]benzimidazole-4-carboxylate	v2	NDA020838	CARDIOVASCULAR SYSTEM	a5a28d5d-8005-401b-9e14-65a818f42c51	229d77fb-d4cd-4ae7-8216-60b0ebbf43f5	46161440	90aae7e9-43dd-4c14-b877-e99f3ed797f4	Carcinogenicity	61277	carcinogenicity: oral	1895	experimental study				{"AdministrativeData": {"Endpoint": {"code": "61277"}, "StudyResultType": {"code": "1895"}, "RobustStudy": false, "UsedForClassification": false, "UsedForMSDS": false}, "MaterialsAndMethods": {"TestMaterials": {"TestMaterialInformation": "0260d68a-deaa-4ec5-ac20-3470b5c643a3/a5a28d5d-8005-401b-9e14-65a818f42c51", "SpecificDetailsOnTestMaterialUsedForTheStudy": "Lot#M464-013,-104, -015, -016, -017…	rat	other:F344/Jcl	oral: feed	24 months	not specified	None mg/kg bw/day (actual dose received), 300.0 mg/kg bw/day (actual dose received), 100.0 mg/kg bw/day (actual dose received), 1000.0 mg/kg bw/day (actual dose received)	Significantly lower than control body weights and body weight gains were noted for males in all treatment groups beginning week 1 of the dosing period (Table 82; Fig. 14). The body weight effects were dose-dependent and maximal around weeks 70-78 of the study; by study termination, body weights among treated male groups were comparable to control. For female rats, there was a lower than control b…				Significantly lower than control food consumption was noted for males in all treatment groups throughout the first 74 weeks of the study; by week 78, only the mid dose and high dose males showed significantly lower than control food consumption. Food consumption by candesartan cilexetil-treated females was comparable to control throughout most of the study (Table 83).		Higher than control incidences of an enlarged spleen and a rough kidney surface were noted in high dose males'(Table 86). The incidences of all other macroscopic lesions were comparable among control and treated groups.	Slight and non-dose-related, but significantly lower than control numbers of platelets were noted in males in all the treatment groups. Slight and non-significantly lower than control erythroid values were noted in females treated with 100 mg candesartan cilexetil/kg/day (Table 85).	Increase above control incidences of juxtaglomerular cell hypertrophy and intimal proliferation in the interlobular arteries of the kidney were observed in candesartan cilexetil- treated groups. Also, increases above control incidence and severity of atrophy of zona glomerulosa cells in the adrenal glands were observed in candesartan-treated rats of both sexes from all treated groups (91). The in…	The sponsor’s analysis revealed that the numbers of tumor-bearing animals and total primary neoplasms including benign, malignant and hematopoietic neoplasms were not significantly affected by candesartan cilexetil treatment (Table 87)._x000D_ _x000D_ In female rats treated with candesartan cilexetil, the incidence of pheochromocytoma (benign), showed a positive trend (p= 0.044) and there were st…						Forty-six male rats and 44 female rats died or were killed in extremis during the course of the study. There were no significant differences in survival rates among the control and treated groups of either sex (Table 81, Fig 13).	Body Weight: Significantly lower than control body weights and body weight gains were noted for males in all treatment groups beginning week 1 of the dosing period (Table 82; Fig. 14). The body weight effects were dose-dependent and maximal around weeks 70-78 of the study; by study termination, body weights among treated male groups were comparable to control. For female rats, there was a lower t…			Body Weight: Significantly lower than control body weights and body weight gains were noted for males in all treatment groups beginning week 1 of the dosing period (Table 82; Fig. 14). The body weight effects were dose-dependent and maximal around weeks 70-78 of the study; by study termination, body weights among treated male groups were comparable to control. For female rats, there was a lower t…	5b7f5102-a5e2-41be-8062-54c41afbd106	FALSE	{'code': '61025', 'code (mapped)': 'histopathology: non-neoplastic'}	345
229d77fb-d4cd-4ae7-8216-60b0ebbf43f5_dossier.i6z	NDA020838-candesartan cilexetil	145040-37-5	1-cyclohexyloxycarbonyloxyethyl 2-ethoxy-3-[[4-[2-(2H-tetrazol-5-yl)phenyl]phenyl]methyl]benzimidazole-4-carboxylate	v2	NDA020838	CARDIOVASCULAR SYSTEM	a5a28d5d-8005-401b-9e14-65a818f42c51	229d77fb-d4cd-4ae7-8216-60b0ebbf43f5	46161440	90aae7e9-43dd-4c14-b877-e99f3ed797f4	Carcinogenicity	61277	carcinogenicity: oral	1895	experimental study				{"AdministrativeData": {"Endpoint": {"code": "61277"}, "StudyResultType": {"code": "1895"}, "RobustStudy": false, "UsedForClassification": false, "UsedForMSDS": false}, "MaterialsAndMethods": {"TestMaterials": {"TestMaterialInformation": "0260d68a-deaa-4ec5-ac20-3470b5c643a3/a5a28d5d-8005-401b-9e14-65a818f42c51", "SpecificDetailsOnTestMaterialUsedForTheStudy": "Lot#M464-013,-104, -015, -016, -017…	rat	other:F344/Jcl	oral: feed	24 months	not specified	None mg/kg bw/day (actual dose received), 300.0 mg/kg bw/day (actual dose received), 100.0 mg/kg bw/day (actual dose received), 1000.0 mg/kg bw/day (actual dose received)	Significantly lower than control body weights and body weight gains were noted for males in all treatment groups beginning week 1 of the dosing period (Table 82; Fig. 14). The body weight effects were dose-dependent and maximal around weeks 70-78 of the study; by study termination, body weights among treated male groups were comparable to control. For female rats, there was a lower than control b…				Significantly lower than control food consumption was noted for males in all treatment groups throughout the first 74 weeks of the study; by week 78, only the mid dose and high dose males showed significantly lower than control food consumption. Food consumption by candesartan cilexetil-treated females was comparable to control throughout most of the study (Table 83).		Higher than control incidences of an enlarged spleen and a rough kidney surface were noted in high dose males'(Table 86). The incidences of all other macroscopic lesions were comparable among control and treated groups.	Slight and non-dose-related, but significantly lower than control numbers of platelets were noted in males in all the treatment groups. Slight and non-significantly lower than control erythroid values were noted in females treated with 100 mg candesartan cilexetil/kg/day (Table 85).	Increase above control incidences of juxtaglomerular cell hypertrophy and intimal proliferation in the interlobular arteries of the kidney were observed in candesartan cilexetil- treated groups. Also, increases above control incidence and severity of atrophy of zona glomerulosa cells in the adrenal glands were observed in candesartan-treated rats of both sexes from all treated groups (91). The in…	The sponsor’s analysis revealed that the numbers of tumor-bearing animals and total primary neoplasms including benign, malignant and hematopoietic neoplasms were not significantly affected by candesartan cilexetil treatment (Table 87)._x000D_ _x000D_ In female rats treated with candesartan cilexetil, the incidence of pheochromocytoma (benign), showed a positive trend (p= 0.044) and there were st…						Forty-six male rats and 44 female rats died or were killed in extremis during the course of the study. There were no significant differences in survival rates among the control and treated groups of either sex (Table 81, Fig 13).	Body Weight: Significantly lower than control body weights and body weight gains were noted for males in all treatment groups beginning week 1 of the dosing period (Table 82; Fig. 14). The body weight effects were dose-dependent and maximal around weeks 70-78 of the study; by study termination, body weights among treated male groups were comparable to control. For female rats, there was a lower t…			Body Weight: Significantly lower than control body weights and body weight gains were noted for males in all treatment groups beginning week 1 of the dosing period (Table 82; Fig. 14). The body weight effects were dose-dependent and maximal around weeks 70-78 of the study; by study termination, body weights among treated male groups were comparable to control. For female rats, there was a lower t…	5b7f5102-a5e2-41be-8062-54c41afbd106	FALSE	{'code': '61025', 'code (mapped)': 'histopathology: non-neoplastic'}	345
229d77fb-d4cd-4ae7-8216-60b0ebbf43f5_dossier.i6z	NDA020838-candesartan cilexetil	145040-37-5	1-cyclohexyloxycarbonyloxyethyl 2-ethoxy-3-[[4-[2-(2H-tetrazol-5-yl)phenyl]phenyl]methyl]benzimidazole-4-carboxylate	v2	NDA020838	CARDIOVASCULAR SYSTEM	a5a28d5d-8005-401b-9e14-65a818f42c51	229d77fb-d4cd-4ae7-8216-60b0ebbf43f5	46161440	90aae7e9-43dd-4c14-b877-e99f3ed797f4	Carcinogenicity	61277	carcinogenicity: oral	1895	experimental study				{"AdministrativeData": {"Endpoint": {"code": "61277"}, "StudyResultType": {"code": "1895"}, "RobustStudy": false, "UsedForClassification": false, "UsedForMSDS": false}, "MaterialsAndMethods": {"TestMaterials": {"TestMaterialInformation": "0260d68a-deaa-4ec5-ac20-3470b5c643a3/a5a28d5d-8005-401b-9e14-65a818f42c51", "SpecificDetailsOnTestMaterialUsedForTheStudy": "Lot#M464-013,-104, -015, -016, -017…	rat	other:F344/Jcl	oral: feed	24 months	not specified	None mg/kg bw/day (actual dose received), 300.0 mg/kg bw/day (actual dose received), 100.0 mg/kg bw/day (actual dose received), 1000.0 mg/kg bw/day (actual dose received)	Significantly lower than control body weights and body weight gains were noted for males in all treatment groups beginning week 1 of the dosing period (Table 82; Fig. 14). The body weight effects were dose-dependent and maximal around weeks 70-78 of the study; by study termination, body weights among treated male groups were comparable to control. For female rats, there was a lower than control b…				Significantly lower than control food consumption was noted for males in all treatment groups throughout the first 74 weeks of the study; by week 78, only the mid dose and high dose males showed significantly lower than control food consumption. Food consumption by candesartan cilexetil-treated females was comparable to control throughout most of the study (Table 83).		Higher than control incidences of an enlarged spleen and a rough kidney surface were noted in high dose males'(Table 86). The incidences of all other macroscopic lesions were comparable among control and treated groups.	Slight and non-dose-related, but significantly lower than control numbers of platelets were noted in males in all the treatment groups. Slight and non-significantly lower than control erythroid values were noted in females treated with 100 mg candesartan cilexetil/kg/day (Table 85).	Increase above control incidences of juxtaglomerular cell hypertrophy and intimal proliferation in the interlobular arteries of the kidney were observed in candesartan cilexetil- treated groups. Also, increases above control incidence and severity of atrophy of zona glomerulosa cells in the adrenal glands were observed in candesartan-treated rats of both sexes from all treated groups (91). The in…	The sponsor’s analysis revealed that the numbers of tumor-bearing animals and total primary neoplasms including benign, malignant and hematopoietic neoplasms were not significantly affected by candesartan cilexetil treatment (Table 87)._x000D_ _x000D_ In female rats treated with candesartan cilexetil, the incidence of pheochromocytoma (benign), showed a positive trend (p= 0.044) and there were st…						Forty-six male rats and 44 female rats died or were killed in extremis during the course of the study. There were no significant differences in survival rates among the control and treated groups of either sex (Table 81, Fig 13).	Body Weight: Significantly lower than control body weights and body weight gains were noted for males in all treatment groups beginning week 1 of the dosing period (Table 82; Fig. 14). The body weight effects were dose-dependent and maximal around weeks 70-78 of the study; by study termination, body weights among treated male groups were comparable to control. For female rats, there was a lower t…			Body Weight: Significantly lower than control body weights and body weight gains were noted for males in all treatment groups beginning week 1 of the dosing period (Table 82; Fig. 14). The body weight effects were dose-dependent and maximal around weeks 70-78 of the study; by study termination, body weights among treated male groups were comparable to control. For female rats, there was a lower t…	71a1403e-43b7-458e-992b-21ac7aecd7cd	FALSE	{'code': '61025', 'code (mapped)': 'histopathology: non-neoplastic'}	345
229d77fb-d4cd-4ae7-8216-60b0ebbf43f5_dossier.i6z	NDA020838-candesartan cilexetil	145040-37-5	1-cyclohexyloxycarbonyloxyethyl 2-ethoxy-3-[[4-[2-(2H-tetrazol-5-yl)phenyl]phenyl]methyl]benzimidazole-4-carboxylate	v2	NDA020838	CARDIOVASCULAR SYSTEM	a5a28d5d-8005-401b-9e14-65a818f42c51	229d77fb-d4cd-4ae7-8216-60b0ebbf43f5	46161440	90aae7e9-43dd-4c14-b877-e99f3ed797f4	Carcinogenicity	61277	carcinogenicity: oral	1895	experimental study				{"AdministrativeData": {"Endpoint": {"code": "61277"}, "StudyResultType": {"code": "1895"}, "RobustStudy": false, "UsedForClassification": false, "UsedForMSDS": false}, "MaterialsAndMethods": {"TestMaterials": {"TestMaterialInformation": "0260d68a-deaa-4ec5-ac20-3470b5c643a3/a5a28d5d-8005-401b-9e14-65a818f42c51", "SpecificDetailsOnTestMaterialUsedForTheStudy": "Lot#M464-013,-104, -015, -016, -017…	rat	other:F344/Jcl	oral: feed	24 months	not specified	None mg/kg bw/day (actual dose received), 300.0 mg/kg bw/day (actual dose received), 100.0 mg/kg bw/day (actual dose received), 1000.0 mg/kg bw/day (actual dose received)	Significantly lower than control body weights and body weight gains were noted for males in all treatment groups beginning week 1 of the dosing period (Table 82; Fig. 14). The body weight effects were dose-dependent and maximal around weeks 70-78 of the study; by study termination, body weights among treated male groups were comparable to control. For female rats, there was a lower than control b…				Significantly lower than control food consumption was noted for males in all treatment groups throughout the first 74 weeks of the study; by week 78, only the mid dose and high dose males showed significantly lower than control food consumption. Food consumption by candesartan cilexetil-treated females was comparable to control throughout most of the study (Table 83).		Higher than control incidences of an enlarged spleen and a rough kidney surface were noted in high dose males'(Table 86). The incidences of all other macroscopic lesions were comparable among control and treated groups.	Slight and non-dose-related, but significantly lower than control numbers of platelets were noted in males in all the treatment groups. Slight and non-significantly lower than control erythroid values were noted in females treated with 100 mg candesartan cilexetil/kg/day (Table 85).	Increase above control incidences of juxtaglomerular cell hypertrophy and intimal proliferation in the interlobular arteries of the kidney were observed in candesartan cilexetil- treated groups. Also, increases above control incidence and severity of atrophy of zona glomerulosa cells in the adrenal glands were observed in candesartan-treated rats of both sexes from all treated groups (91). The in…	The sponsor’s analysis revealed that the numbers of tumor-bearing animals and total primary neoplasms including benign, malignant and hematopoietic neoplasms were not significantly affected by candesartan cilexetil treatment (Table 87)._x000D_ _x000D_ In female rats treated with candesartan cilexetil, the incidence of pheochromocytoma (benign), showed a positive trend (p= 0.044) and there were st…						Forty-six male rats and 44 female rats died or were killed in extremis during the course of the study. There were no significant differences in survival rates among the control and treated groups of either sex (Table 81, Fig 13).	Body Weight: Significantly lower than control body weights and body weight gains were noted for males in all treatment groups beginning week 1 of the dosing period (Table 82; Fig. 14). The body weight effects were dose-dependent and maximal around weeks 70-78 of the study; by study termination, body weights among treated male groups were comparable to control. For female rats, there was a lower t…			Body Weight: Significantly lower than control body weights and body weight gains were noted for males in all treatment groups beginning week 1 of the dosing period (Table 82; Fig. 14). The body weight effects were dose-dependent and maximal around weeks 70-78 of the study; by study termination, body weights among treated male groups were comparable to control. For female rats, there was a lower t…	8684abd8-ec51-46f3-9839-55958a5b6304	FALSE	{'code': '61012', 'code (mapped)': 'body weight and weight gain'}	345
229d77fb-d4cd-4ae7-8216-60b0ebbf43f5_dossier.i6z	NDA020838-candesartan cilexetil	145040-37-5	1-cyclohexyloxycarbonyloxyethyl 2-ethoxy-3-[[4-[2-(2H-tetrazol-5-yl)phenyl]phenyl]methyl]benzimidazole-4-carboxylate	v2	NDA020838	CARDIOVASCULAR SYSTEM	a5a28d5d-8005-401b-9e14-65a818f42c51	229d77fb-d4cd-4ae7-8216-60b0ebbf43f5	46161440	90aae7e9-43dd-4c14-b877-e99f3ed797f4	Carcinogenicity	61277	carcinogenicity: oral	1895	experimental study				{"AdministrativeData": {"Endpoint": {"code": "61277"}, "StudyResultType": {"code": "1895"}, "RobustStudy": false, "UsedForClassification": false, "UsedForMSDS": false}, "MaterialsAndMethods": {"TestMaterials": {"TestMaterialInformation": "0260d68a-deaa-4ec5-ac20-3470b5c643a3/a5a28d5d-8005-401b-9e14-65a818f42c51", "SpecificDetailsOnTestMaterialUsedForTheStudy": "Lot#M464-013,-104, -015, -016, -017…	rat	other:F344/Jcl	oral: feed	24 months	not specified	None mg/kg bw/day (actual dose received), 300.0 mg/kg bw/day (actual dose received), 100.0 mg/kg bw/day (actual dose received), 1000.0 mg/kg bw/day (actual dose received)	Significantly lower than control body weights and body weight gains were noted for males in all treatment groups beginning week 1 of the dosing period (Table 82; Fig. 14). The body weight effects were dose-dependent and maximal around weeks 70-78 of the study; by study termination, body weights among treated male groups were comparable to control. For female rats, there was a lower than control b…				Significantly lower than control food consumption was noted for males in all treatment groups throughout the first 74 weeks of the study; by week 78, only the mid dose and high dose males showed significantly lower than control food consumption. Food consumption by candesartan cilexetil-treated females was comparable to control throughout most of the study (Table 83).		Higher than control incidences of an enlarged spleen and a rough kidney surface were noted in high dose males'(Table 86). The incidences of all other macroscopic lesions were comparable among control and treated groups.	Slight and non-dose-related, but significantly lower than control numbers of platelets were noted in males in all the treatment groups. Slight and non-significantly lower than control erythroid values were noted in females treated with 100 mg candesartan cilexetil/kg/day (Table 85).	Increase above control incidences of juxtaglomerular cell hypertrophy and intimal proliferation in the interlobular arteries of the kidney were observed in candesartan cilexetil- treated groups. Also, increases above control incidence and severity of atrophy of zona glomerulosa cells in the adrenal glands were observed in candesartan-treated rats of both sexes from all treated groups (91). The in…	The sponsor’s analysis revealed that the numbers of tumor-bearing animals and total primary neoplasms including benign, malignant and hematopoietic neoplasms were not significantly affected by candesartan cilexetil treatment (Table 87)._x000D_ _x000D_ In female rats treated with candesartan cilexetil, the incidence of pheochromocytoma (benign), showed a positive trend (p= 0.044) and there were st…						Forty-six male rats and 44 female rats died or were killed in extremis during the course of the study. There were no significant differences in survival rates among the control and treated groups of either sex (Table 81, Fig 13).	Body Weight: Significantly lower than control body weights and body weight gains were noted for males in all treatment groups beginning week 1 of the dosing period (Table 82; Fig. 14). The body weight effects were dose-dependent and maximal around weeks 70-78 of the study; by study termination, body weights among treated male groups were comparable to control. For female rats, there was a lower t…			Body Weight: Significantly lower than control body weights and body weight gains were noted for males in all treatment groups beginning week 1 of the dosing period (Table 82; Fig. 14). The body weight effects were dose-dependent and maximal around weeks 70-78 of the study; by study termination, body weights among treated male groups were comparable to control. For female rats, there was a lower t…	a857b8d3-135b-4eda-afb2-60f250980b05	FALSE		1109
229d77fb-d4cd-4ae7-8216-60b0ebbf43f5_dossier.i6z	NDA020838-candesartan cilexetil	145040-37-5	1-cyclohexyloxycarbonyloxyethyl 2-ethoxy-3-[[4-[2-(2H-tetrazol-5-yl)phenyl]phenyl]methyl]benzimidazole-4-carboxylate	v2	NDA020838	CARDIOVASCULAR SYSTEM	a5a28d5d-8005-401b-9e14-65a818f42c51	229d77fb-d4cd-4ae7-8216-60b0ebbf43f5	46161440	90aae7e9-43dd-4c14-b877-e99f3ed797f4	Carcinogenicity	61277	carcinogenicity: oral	1895	experimental study				{"AdministrativeData": {"Endpoint": {"code": "61277"}, "StudyResultType": {"code": "1895"}, "RobustStudy": false, "UsedForClassification": false, "UsedForMSDS": false}, "MaterialsAndMethods": {"TestMaterials": {"TestMaterialInformation": "0260d68a-deaa-4ec5-ac20-3470b5c643a3/a5a28d5d-8005-401b-9e14-65a818f42c51", "SpecificDetailsOnTestMaterialUsedForTheStudy": "Lot#M464-013,-104, -015, -016, -017…	rat	other:F344/Jcl	oral: feed	24 months	not specified	None mg/kg bw/day (actual dose received), 300.0 mg/kg bw/day (actual dose received), 100.0 mg/kg bw/day (actual dose received), 1000.0 mg/kg bw/day (actual dose received)	Significantly lower than control body weights and body weight gains were noted for males in all treatment groups beginning week 1 of the dosing period (Table 82; Fig. 14). The body weight effects were dose-dependent and maximal around weeks 70-78 of the study; by study termination, body weights among treated male groups were comparable to control. For female rats, there was a lower than control b…				Significantly lower than control food consumption was noted for males in all treatment groups throughout the first 74 weeks of the study; by week 78, only the mid dose and high dose males showed significantly lower than control food consumption. Food consumption by candesartan cilexetil-treated females was comparable to control throughout most of the study (Table 83).		Higher than control incidences of an enlarged spleen and a rough kidney surface were noted in high dose males'(Table 86). The incidences of all other macroscopic lesions were comparable among control and treated groups.	Slight and non-dose-related, but significantly lower than control numbers of platelets were noted in males in all the treatment groups. Slight and non-significantly lower than control erythroid values were noted in females treated with 100 mg candesartan cilexetil/kg/day (Table 85).	Increase above control incidences of juxtaglomerular cell hypertrophy and intimal proliferation in the interlobular arteries of the kidney were observed in candesartan cilexetil- treated groups. Also, increases above control incidence and severity of atrophy of zona glomerulosa cells in the adrenal glands were observed in candesartan-treated rats of both sexes from all treated groups (91). The in…	The sponsor’s analysis revealed that the numbers of tumor-bearing animals and total primary neoplasms including benign, malignant and hematopoietic neoplasms were not significantly affected by candesartan cilexetil treatment (Table 87)._x000D_ _x000D_ In female rats treated with candesartan cilexetil, the incidence of pheochromocytoma (benign), showed a positive trend (p= 0.044) and there were st…						Forty-six male rats and 44 female rats died or were killed in extremis during the course of the study. There were no significant differences in survival rates among the control and treated groups of either sex (Table 81, Fig 13).	Body Weight: Significantly lower than control body weights and body weight gains were noted for males in all treatment groups beginning week 1 of the dosing period (Table 82; Fig. 14). The body weight effects were dose-dependent and maximal around weeks 70-78 of the study; by study termination, body weights among treated male groups were comparable to control. For female rats, there was a lower t…			Body Weight: Significantly lower than control body weights and body weight gains were noted for males in all treatment groups beginning week 1 of the dosing period (Table 82; Fig. 14). The body weight effects were dose-dependent and maximal around weeks 70-78 of the study; by study termination, body weights among treated male groups were comparable to control. For female rats, there was a lower t…	ad6c64eb-26b3-4a07-930c-8c0f0cbd1a8d	FALSE	{'code': '61023', 'code (mapped)': 'gross pathology'}	345
229d77fb-d4cd-4ae7-8216-60b0ebbf43f5_dossier.i6z	NDA020838-candesartan cilexetil	145040-37-5	1-cyclohexyloxycarbonyloxyethyl 2-ethoxy-3-[[4-[2-(2H-tetrazol-5-yl)phenyl]phenyl]methyl]benzimidazole-4-carboxylate	v2	NDA020838	CARDIOVASCULAR SYSTEM	a5a28d5d-8005-401b-9e14-65a818f42c51	229d77fb-d4cd-4ae7-8216-60b0ebbf43f5	46161440	90aae7e9-43dd-4c14-b877-e99f3ed797f4	Carcinogenicity	61277	carcinogenicity: oral	1895	experimental study				{"AdministrativeData": {"Endpoint": {"code": "61277"}, "StudyResultType": {"code": "1895"}, "RobustStudy": false, "UsedForClassification": false, "UsedForMSDS": false}, "MaterialsAndMethods": {"TestMaterials": {"TestMaterialInformation": "0260d68a-deaa-4ec5-ac20-3470b5c643a3/a5a28d5d-8005-401b-9e14-65a818f42c51", "SpecificDetailsOnTestMaterialUsedForTheStudy": "Lot#M464-013,-104, -015, -016, -017…	rat	other:F344/Jcl	oral: feed	24 months	not specified	None mg/kg bw/day (actual dose received), 300.0 mg/kg bw/day (actual dose received), 100.0 mg/kg bw/day (actual dose received), 1000.0 mg/kg bw/day (actual dose received)	Significantly lower than control body weights and body weight gains were noted for males in all treatment groups beginning week 1 of the dosing period (Table 82; Fig. 14). The body weight effects were dose-dependent and maximal around weeks 70-78 of the study; by study termination, body weights among treated male groups were comparable to control. For female rats, there was a lower than control b…				Significantly lower than control food consumption was noted for males in all treatment groups throughout the first 74 weeks of the study; by week 78, only the mid dose and high dose males showed significantly lower than control food consumption. Food consumption by candesartan cilexetil-treated females was comparable to control throughout most of the study (Table 83).		Higher than control incidences of an enlarged spleen and a rough kidney surface were noted in high dose males'(Table 86). The incidences of all other macroscopic lesions were comparable among control and treated groups.	Slight and non-dose-related, but significantly lower than control numbers of platelets were noted in males in all the treatment groups. Slight and non-significantly lower than control erythroid values were noted in females treated with 100 mg candesartan cilexetil/kg/day (Table 85).	Increase above control incidences of juxtaglomerular cell hypertrophy and intimal proliferation in the interlobular arteries of the kidney were observed in candesartan cilexetil- treated groups. Also, increases above control incidence and severity of atrophy of zona glomerulosa cells in the adrenal glands were observed in candesartan-treated rats of both sexes from all treated groups (91). The in…	The sponsor’s analysis revealed that the numbers of tumor-bearing animals and total primary neoplasms including benign, malignant and hematopoietic neoplasms were not significantly affected by candesartan cilexetil treatment (Table 87)._x000D_ _x000D_ In female rats treated with candesartan cilexetil, the incidence of pheochromocytoma (benign), showed a positive trend (p= 0.044) and there were st…						Forty-six male rats and 44 female rats died or were killed in extremis during the course of the study. There were no significant differences in survival rates among the control and treated groups of either sex (Table 81, Fig 13).	Body Weight: Significantly lower than control body weights and body weight gains were noted for males in all treatment groups beginning week 1 of the dosing period (Table 82; Fig. 14). The body weight effects were dose-dependent and maximal around weeks 70-78 of the study; by study termination, body weights among treated male groups were comparable to control. For female rats, there was a lower t…			Body Weight: Significantly lower than control body weights and body weight gains were noted for males in all treatment groups beginning week 1 of the dosing period (Table 82; Fig. 14). The body weight effects were dose-dependent and maximal around weeks 70-78 of the study; by study termination, body weights among treated male groups were comparable to control. For female rats, there was a lower t…	ad6c64eb-26b3-4a07-930c-8c0f0cbd1a8d	FALSE	{'code': '61023', 'code (mapped)': 'gross pathology'}	345
229d77fb-d4cd-4ae7-8216-60b0ebbf43f5_dossier.i6z	NDA020838-candesartan cilexetil	145040-37-5	1-cyclohexyloxycarbonyloxyethyl 2-ethoxy-3-[[4-[2-(2H-tetrazol-5-yl)phenyl]phenyl]methyl]benzimidazole-4-carboxylate	v2	NDA020838	CARDIOVASCULAR SYSTEM	a5a28d5d-8005-401b-9e14-65a818f42c51	229d77fb-d4cd-4ae7-8216-60b0ebbf43f5	46161440	90aae7e9-43dd-4c14-b877-e99f3ed797f4	Carcinogenicity	61277	carcinogenicity: oral	1895	experimental study				{"AdministrativeData": {"Endpoint": {"code": "61277"}, "StudyResultType": {"code": "1895"}, "RobustStudy": false, "UsedForClassification": false, "UsedForMSDS": false}, "MaterialsAndMethods": {"TestMaterials": {"TestMaterialInformation": "0260d68a-deaa-4ec5-ac20-3470b5c643a3/a5a28d5d-8005-401b-9e14-65a818f42c51", "SpecificDetailsOnTestMaterialUsedForTheStudy": "Lot#M464-013,-104, -015, -016, -017…	rat	other:F344/Jcl	oral: feed	24 months	not specified	None mg/kg bw/day (actual dose received), 300.0 mg/kg bw/day (actual dose received), 100.0 mg/kg bw/day (actual dose received), 1000.0 mg/kg bw/day (actual dose received)	Significantly lower than control body weights and body weight gains were noted for males in all treatment groups beginning week 1 of the dosing period (Table 82; Fig. 14). The body weight effects were dose-dependent and maximal around weeks 70-78 of the study; by study termination, body weights among treated male groups were comparable to control. For female rats, there was a lower than control b…				Significantly lower than control food consumption was noted for males in all treatment groups throughout the first 74 weeks of the study; by week 78, only the mid dose and high dose males showed significantly lower than control food consumption. Food consumption by candesartan cilexetil-treated females was comparable to control throughout most of the study (Table 83).		Higher than control incidences of an enlarged spleen and a rough kidney surface were noted in high dose males'(Table 86). The incidences of all other macroscopic lesions were comparable among control and treated groups.	Slight and non-dose-related, but significantly lower than control numbers of platelets were noted in males in all the treatment groups. Slight and non-significantly lower than control erythroid values were noted in females treated with 100 mg candesartan cilexetil/kg/day (Table 85).	Increase above control incidences of juxtaglomerular cell hypertrophy and intimal proliferation in the interlobular arteries of the kidney were observed in candesartan cilexetil- treated groups. Also, increases above control incidence and severity of atrophy of zona glomerulosa cells in the adrenal glands were observed in candesartan-treated rats of both sexes from all treated groups (91). The in…	The sponsor’s analysis revealed that the numbers of tumor-bearing animals and total primary neoplasms including benign, malignant and hematopoietic neoplasms were not significantly affected by candesartan cilexetil treatment (Table 87)._x000D_ _x000D_ In female rats treated with candesartan cilexetil, the incidence of pheochromocytoma (benign), showed a positive trend (p= 0.044) and there were st…						Forty-six male rats and 44 female rats died or were killed in extremis during the course of the study. There were no significant differences in survival rates among the control and treated groups of either sex (Table 81, Fig 13).	Body Weight: Significantly lower than control body weights and body weight gains were noted for males in all treatment groups beginning week 1 of the dosing period (Table 82; Fig. 14). The body weight effects were dose-dependent and maximal around weeks 70-78 of the study; by study termination, body weights among treated male groups were comparable to control. For female rats, there was a lower t…			Body Weight: Significantly lower than control body weights and body weight gains were noted for males in all treatment groups beginning week 1 of the dosing period (Table 82; Fig. 14). The body weight effects were dose-dependent and maximal around weeks 70-78 of the study; by study termination, body weights among treated male groups were comparable to control. For female rats, there was a lower t…	b5ef0fcb-12b0-4e1f-8af5-b24d3baa5ac4	FALSE	{'code': '61026', 'code (mapped)': 'histopathology: neoplastic'}	345
229d77fb-d4cd-4ae7-8216-60b0ebbf43f5_dossier.i6z	NDA020838-candesartan cilexetil	145040-37-5	1-cyclohexyloxycarbonyloxyethyl 2-ethoxy-3-[[4-[2-(2H-tetrazol-5-yl)phenyl]phenyl]methyl]benzimidazole-4-carboxylate	v2	NDA020838	CARDIOVASCULAR SYSTEM	a5a28d5d-8005-401b-9e14-65a818f42c51	229d77fb-d4cd-4ae7-8216-60b0ebbf43f5	46161440	90aae7e9-43dd-4c14-b877-e99f3ed797f4	Carcinogenicity	61277	carcinogenicity: oral	1895	experimental study				{"AdministrativeData": {"Endpoint": {"code": "61277"}, "StudyResultType": {"code": "1895"}, "RobustStudy": false, "UsedForClassification": false, "UsedForMSDS": false}, "MaterialsAndMethods": {"TestMaterials": {"TestMaterialInformation": "0260d68a-deaa-4ec5-ac20-3470b5c643a3/a5a28d5d-8005-401b-9e14-65a818f42c51", "SpecificDetailsOnTestMaterialUsedForTheStudy": "Lot#M464-013,-104, -015, -016, -017…	rat	other:F344/Jcl	oral: feed	24 months	not specified	None mg/kg bw/day (actual dose received), 300.0 mg/kg bw/day (actual dose received), 100.0 mg/kg bw/day (actual dose received), 1000.0 mg/kg bw/day (actual dose received)	Significantly lower than control body weights and body weight gains were noted for males in all treatment groups beginning week 1 of the dosing period (Table 82; Fig. 14). The body weight effects were dose-dependent and maximal around weeks 70-78 of the study; by study termination, body weights among treated male groups were comparable to control. For female rats, there was a lower than control b…				Significantly lower than control food consumption was noted for males in all treatment groups throughout the first 74 weeks of the study; by week 78, only the mid dose and high dose males showed significantly lower than control food consumption. Food consumption by candesartan cilexetil-treated females was comparable to control throughout most of the study (Table 83).		Higher than control incidences of an enlarged spleen and a rough kidney surface were noted in high dose males'(Table 86). The incidences of all other macroscopic lesions were comparable among control and treated groups.	Slight and non-dose-related, but significantly lower than control numbers of platelets were noted in males in all the treatment groups. Slight and non-significantly lower than control erythroid values were noted in females treated with 100 mg candesartan cilexetil/kg/day (Table 85).	Increase above control incidences of juxtaglomerular cell hypertrophy and intimal proliferation in the interlobular arteries of the kidney were observed in candesartan cilexetil- treated groups. Also, increases above control incidence and severity of atrophy of zona glomerulosa cells in the adrenal glands were observed in candesartan-treated rats of both sexes from all treated groups (91). The in…	The sponsor’s analysis revealed that the numbers of tumor-bearing animals and total primary neoplasms including benign, malignant and hematopoietic neoplasms were not significantly affected by candesartan cilexetil treatment (Table 87)._x000D_ _x000D_ In female rats treated with candesartan cilexetil, the incidence of pheochromocytoma (benign), showed a positive trend (p= 0.044) and there were st…						Forty-six male rats and 44 female rats died or were killed in extremis during the course of the study. There were no significant differences in survival rates among the control and treated groups of either sex (Table 81, Fig 13).	Body Weight: Significantly lower than control body weights and body weight gains were noted for males in all treatment groups beginning week 1 of the dosing period (Table 82; Fig. 14). The body weight effects were dose-dependent and maximal around weeks 70-78 of the study; by study termination, body weights among treated male groups were comparable to control. For female rats, there was a lower t…			Body Weight: Significantly lower than control body weights and body weight gains were noted for males in all treatment groups beginning week 1 of the dosing period (Table 82; Fig. 14). The body weight effects were dose-dependent and maximal around weeks 70-78 of the study; by study termination, body weights among treated male groups were comparable to control. For female rats, there was a lower t…	c2139b18-fee5-4f80-bae1-8fa6d6239441	FALSE	{'code': '61026', 'code (mapped)': 'histopathology: neoplastic'}	345
229d77fb-d4cd-4ae7-8216-60b0ebbf43f5_dossier.i6z	NDA020838-candesartan cilexetil	145040-37-5	1-cyclohexyloxycarbonyloxyethyl 2-ethoxy-3-[[4-[2-(2H-tetrazol-5-yl)phenyl]phenyl]methyl]benzimidazole-4-carboxylate	v2	NDA020838	CARDIOVASCULAR SYSTEM	a5a28d5d-8005-401b-9e14-65a818f42c51	229d77fb-d4cd-4ae7-8216-60b0ebbf43f5	46161440	90aae7e9-43dd-4c14-b877-e99f3ed797f4	Carcinogenicity	61277	carcinogenicity: oral	1895	experimental study				{"AdministrativeData": {"Endpoint": {"code": "61277"}, "StudyResultType": {"code": "1895"}, "RobustStudy": false, "UsedForClassification": false, "UsedForMSDS": false}, "MaterialsAndMethods": {"TestMaterials": {"TestMaterialInformation": "0260d68a-deaa-4ec5-ac20-3470b5c643a3/a5a28d5d-8005-401b-9e14-65a818f42c51", "SpecificDetailsOnTestMaterialUsedForTheStudy": "Lot#M464-013,-104, -015, -016, -017…	rat	other:F344/Jcl	oral: feed	24 months	not specified	None mg/kg bw/day (actual dose received), 300.0 mg/kg bw/day (actual dose received), 100.0 mg/kg bw/day (actual dose received), 1000.0 mg/kg bw/day (actual dose received)	Significantly lower than control body weights and body weight gains were noted for males in all treatment groups beginning week 1 of the dosing period (Table 82; Fig. 14). The body weight effects were dose-dependent and maximal around weeks 70-78 of the study; by study termination, body weights among treated male groups were comparable to control. For female rats, there was a lower than control b…				Significantly lower than control food consumption was noted for males in all treatment groups throughout the first 74 weeks of the study; by week 78, only the mid dose and high dose males showed significantly lower than control food consumption. Food consumption by candesartan cilexetil-treated females was comparable to control throughout most of the study (Table 83).		Higher than control incidences of an enlarged spleen and a rough kidney surface were noted in high dose males'(Table 86). The incidences of all other macroscopic lesions were comparable among control and treated groups.	Slight and non-dose-related, but significantly lower than control numbers of platelets were noted in males in all the treatment groups. Slight and non-significantly lower than control erythroid values were noted in females treated with 100 mg candesartan cilexetil/kg/day (Table 85).	Increase above control incidences of juxtaglomerular cell hypertrophy and intimal proliferation in the interlobular arteries of the kidney were observed in candesartan cilexetil- treated groups. Also, increases above control incidence and severity of atrophy of zona glomerulosa cells in the adrenal glands were observed in candesartan-treated rats of both sexes from all treated groups (91). The in…	The sponsor’s analysis revealed that the numbers of tumor-bearing animals and total primary neoplasms including benign, malignant and hematopoietic neoplasms were not significantly affected by candesartan cilexetil treatment (Table 87)._x000D_ _x000D_ In female rats treated with candesartan cilexetil, the incidence of pheochromocytoma (benign), showed a positive trend (p= 0.044) and there were st…						Forty-six male rats and 44 female rats died or were killed in extremis during the course of the study. There were no significant differences in survival rates among the control and treated groups of either sex (Table 81, Fig 13).	Body Weight: Significantly lower than control body weights and body weight gains were noted for males in all treatment groups beginning week 1 of the dosing period (Table 82; Fig. 14). The body weight effects were dose-dependent and maximal around weeks 70-78 of the study; by study termination, body weights among treated male groups were comparable to control. For female rats, there was a lower t…			Body Weight: Significantly lower than control body weights and body weight gains were noted for males in all treatment groups beginning week 1 of the dosing period (Table 82; Fig. 14). The body weight effects were dose-dependent and maximal around weeks 70-78 of the study; by study termination, body weights among treated male groups were comparable to control. For female rats, there was a lower t…	c2139b18-fee5-4f80-bae1-8fa6d6239441	FALSE	{'code': '61026', 'code (mapped)': 'histopathology: neoplastic'}	345
229d77fb-d4cd-4ae7-8216-60b0ebbf43f5_dossier.i6z	NDA020838-candesartan cilexetil	145040-37-5	1-cyclohexyloxycarbonyloxyethyl 2-ethoxy-3-[[4-[2-(2H-tetrazol-5-yl)phenyl]phenyl]methyl]benzimidazole-4-carboxylate	v2	NDA020838	CARDIOVASCULAR SYSTEM	a5a28d5d-8005-401b-9e14-65a818f42c51	229d77fb-d4cd-4ae7-8216-60b0ebbf43f5	46161440	90aae7e9-43dd-4c14-b877-e99f3ed797f4	Carcinogenicity	61277	carcinogenicity: oral	1895	experimental study				{"AdministrativeData": {"Endpoint": {"code": "61277"}, "StudyResultType": {"code": "1895"}, "RobustStudy": false, "UsedForClassification": false, "UsedForMSDS": false}, "MaterialsAndMethods": {"TestMaterials": {"TestMaterialInformation": "0260d68a-deaa-4ec5-ac20-3470b5c643a3/a5a28d5d-8005-401b-9e14-65a818f42c51", "SpecificDetailsOnTestMaterialUsedForTheStudy": "Lot#M464-013,-104, -015, -016, -017…	rat	other:F344/Jcl	oral: feed	24 months	not specified	None mg/kg bw/day (actual dose received), 300.0 mg/kg bw/day (actual dose received), 100.0 mg/kg bw/day (actual dose received), 1000.0 mg/kg bw/day (actual dose received)	Significantly lower than control body weights and body weight gains were noted for males in all treatment groups beginning week 1 of the dosing period (Table 82; Fig. 14). The body weight effects were dose-dependent and maximal around weeks 70-78 of the study; by study termination, body weights among treated male groups were comparable to control. For female rats, there was a lower than control b…				Significantly lower than control food consumption was noted for males in all treatment groups throughout the first 74 weeks of the study; by week 78, only the mid dose and high dose males showed significantly lower than control food consumption. Food consumption by candesartan cilexetil-treated females was comparable to control throughout most of the study (Table 83).		Higher than control incidences of an enlarged spleen and a rough kidney surface were noted in high dose males'(Table 86). The incidences of all other macroscopic lesions were comparable among control and treated groups.	Slight and non-dose-related, but significantly lower than control numbers of platelets were noted in males in all the treatment groups. Slight and non-significantly lower than control erythroid values were noted in females treated with 100 mg candesartan cilexetil/kg/day (Table 85).	Increase above control incidences of juxtaglomerular cell hypertrophy and intimal proliferation in the interlobular arteries of the kidney were observed in candesartan cilexetil- treated groups. Also, increases above control incidence and severity of atrophy of zona glomerulosa cells in the adrenal glands were observed in candesartan-treated rats of both sexes from all treated groups (91). The in…	The sponsor’s analysis revealed that the numbers of tumor-bearing animals and total primary neoplasms including benign, malignant and hematopoietic neoplasms were not significantly affected by candesartan cilexetil treatment (Table 87)._x000D_ _x000D_ In female rats treated with candesartan cilexetil, the incidence of pheochromocytoma (benign), showed a positive trend (p= 0.044) and there were st…						Forty-six male rats and 44 female rats died or were killed in extremis during the course of the study. There were no significant differences in survival rates among the control and treated groups of either sex (Table 81, Fig 13).	Body Weight: Significantly lower than control body weights and body weight gains were noted for males in all treatment groups beginning week 1 of the dosing period (Table 82; Fig. 14). The body weight effects were dose-dependent and maximal around weeks 70-78 of the study; by study termination, body weights among treated male groups were comparable to control. For female rats, there was a lower t…			Body Weight: Significantly lower than control body weights and body weight gains were noted for males in all treatment groups beginning week 1 of the dosing period (Table 82; Fig. 14). The body weight effects were dose-dependent and maximal around weeks 70-78 of the study; by study termination, body weights among treated male groups were comparable to control. For female rats, there was a lower t…	c2139b18-fee5-4f80-bae1-8fa6d6239441	FALSE	{'code': '61026', 'code (mapped)': 'histopathology: neoplastic'}	345
229d77fb-d4cd-4ae7-8216-60b0ebbf43f5_dossier.i6z	NDA020838-candesartan cilexetil	145040-37-5	1-cyclohexyloxycarbonyloxyethyl 2-ethoxy-3-[[4-[2-(2H-tetrazol-5-yl)phenyl]phenyl]methyl]benzimidazole-4-carboxylate	v2	NDA020838	CARDIOVASCULAR SYSTEM	a5a28d5d-8005-401b-9e14-65a818f42c51	229d77fb-d4cd-4ae7-8216-60b0ebbf43f5	46161440	90aae7e9-43dd-4c14-b877-e99f3ed797f4	Carcinogenicity	61277	carcinogenicity: oral	1895	experimental study				{"AdministrativeData": {"Endpoint": {"code": "61277"}, "StudyResultType": {"code": "1895"}, "RobustStudy": false, "UsedForClassification": false, "UsedForMSDS": false}, "MaterialsAndMethods": {"TestMaterials": {"TestMaterialInformation": "0260d68a-deaa-4ec5-ac20-3470b5c643a3/a5a28d5d-8005-401b-9e14-65a818f42c51", "SpecificDetailsOnTestMaterialUsedForTheStudy": "Lot#M464-013,-104, -015, -016, -017…	rat	other:F344/Jcl	oral: feed	24 months	not specified	None mg/kg bw/day (actual dose received), 300.0 mg/kg bw/day (actual dose received), 100.0 mg/kg bw/day (actual dose received), 1000.0 mg/kg bw/day (actual dose received)	Significantly lower than control body weights and body weight gains were noted for males in all treatment groups beginning week 1 of the dosing period (Table 82; Fig. 14). The body weight effects were dose-dependent and maximal around weeks 70-78 of the study; by study termination, body weights among treated male groups were comparable to control. For female rats, there was a lower than control b…				Significantly lower than control food consumption was noted for males in all treatment groups throughout the first 74 weeks of the study; by week 78, only the mid dose and high dose males showed significantly lower than control food consumption. Food consumption by candesartan cilexetil-treated females was comparable to control throughout most of the study (Table 83).		Higher than control incidences of an enlarged spleen and a rough kidney surface were noted in high dose males'(Table 86). The incidences of all other macroscopic lesions were comparable among control and treated groups.	Slight and non-dose-related, but significantly lower than control numbers of platelets were noted in males in all the treatment groups. Slight and non-significantly lower than control erythroid values were noted in females treated with 100 mg candesartan cilexetil/kg/day (Table 85).	Increase above control incidences of juxtaglomerular cell hypertrophy and intimal proliferation in the interlobular arteries of the kidney were observed in candesartan cilexetil- treated groups. Also, increases above control incidence and severity of atrophy of zona glomerulosa cells in the adrenal glands were observed in candesartan-treated rats of both sexes from all treated groups (91). The in…	The sponsor’s analysis revealed that the numbers of tumor-bearing animals and total primary neoplasms including benign, malignant and hematopoietic neoplasms were not significantly affected by candesartan cilexetil treatment (Table 87)._x000D_ _x000D_ In female rats treated with candesartan cilexetil, the incidence of pheochromocytoma (benign), showed a positive trend (p= 0.044) and there were st…						Forty-six male rats and 44 female rats died or were killed in extremis during the course of the study. There were no significant differences in survival rates among the control and treated groups of either sex (Table 81, Fig 13).	Body Weight: Significantly lower than control body weights and body weight gains were noted for males in all treatment groups beginning week 1 of the dosing period (Table 82; Fig. 14). The body weight effects were dose-dependent and maximal around weeks 70-78 of the study; by study termination, body weights among treated male groups were comparable to control. For female rats, there was a lower t…			Body Weight: Significantly lower than control body weights and body weight gains were noted for males in all treatment groups beginning week 1 of the dosing period (Table 82; Fig. 14). The body weight effects were dose-dependent and maximal around weeks 70-78 of the study; by study termination, body weights among treated male groups were comparable to control. For female rats, there was a lower t…	c60cb93d-ea9f-4f81-8aa9-f94ca8b39c97	FALSE	{'code': '2135', 'code (mapped)': 'mortality'}	345
229d77fb-d4cd-4ae7-8216-60b0ebbf43f5_dossier.i6z	NDA020838-candesartan cilexetil	145040-37-5	1-cyclohexyloxycarbonyloxyethyl 2-ethoxy-3-[[4-[2-(2H-tetrazol-5-yl)phenyl]phenyl]methyl]benzimidazole-4-carboxylate	v2	NDA020838	CARDIOVASCULAR SYSTEM	a5a28d5d-8005-401b-9e14-65a818f42c51	229d77fb-d4cd-4ae7-8216-60b0ebbf43f5	46161440	90aae7e9-43dd-4c14-b877-e99f3ed797f4	Carcinogenicity	61277	carcinogenicity: oral	1895	experimental study				{"AdministrativeData": {"Endpoint": {"code": "61277"}, "StudyResultType": {"code": "1895"}, "RobustStudy": false, "UsedForClassification": false, "UsedForMSDS": false}, "MaterialsAndMethods": {"TestMaterials": {"TestMaterialInformation": "0260d68a-deaa-4ec5-ac20-3470b5c643a3/a5a28d5d-8005-401b-9e14-65a818f42c51", "SpecificDetailsOnTestMaterialUsedForTheStudy": "Lot#M464-013,-104, -015, -016, -017…	rat	other:F344/Jcl	oral: feed	24 months	not specified	None mg/kg bw/day (actual dose received), 300.0 mg/kg bw/day (actual dose received), 100.0 mg/kg bw/day (actual dose received), 1000.0 mg/kg bw/day (actual dose received)	Significantly lower than control body weights and body weight gains were noted for males in all treatment groups beginning week 1 of the dosing period (Table 82; Fig. 14). The body weight effects were dose-dependent and maximal around weeks 70-78 of the study; by study termination, body weights among treated male groups were comparable to control. For female rats, there was a lower than control b…				Significantly lower than control food consumption was noted for males in all treatment groups throughout the first 74 weeks of the study; by week 78, only the mid dose and high dose males showed significantly lower than control food consumption. Food consumption by candesartan cilexetil-treated females was comparable to control throughout most of the study (Table 83).		Higher than control incidences of an enlarged spleen and a rough kidney surface were noted in high dose males'(Table 86). The incidences of all other macroscopic lesions were comparable among control and treated groups.	Slight and non-dose-related, but significantly lower than control numbers of platelets were noted in males in all the treatment groups. Slight and non-significantly lower than control erythroid values were noted in females treated with 100 mg candesartan cilexetil/kg/day (Table 85).	Increase above control incidences of juxtaglomerular cell hypertrophy and intimal proliferation in the interlobular arteries of the kidney were observed in candesartan cilexetil- treated groups. Also, increases above control incidence and severity of atrophy of zona glomerulosa cells in the adrenal glands were observed in candesartan-treated rats of both sexes from all treated groups (91). The in…	The sponsor’s analysis revealed that the numbers of tumor-bearing animals and total primary neoplasms including benign, malignant and hematopoietic neoplasms were not significantly affected by candesartan cilexetil treatment (Table 87)._x000D_ _x000D_ In female rats treated with candesartan cilexetil, the incidence of pheochromocytoma (benign), showed a positive trend (p= 0.044) and there were st…						Forty-six male rats and 44 female rats died or were killed in extremis during the course of the study. There were no significant differences in survival rates among the control and treated groups of either sex (Table 81, Fig 13).	Body Weight: Significantly lower than control body weights and body weight gains were noted for males in all treatment groups beginning week 1 of the dosing period (Table 82; Fig. 14). The body weight effects were dose-dependent and maximal around weeks 70-78 of the study; by study termination, body weights among treated male groups were comparable to control. For female rats, there was a lower t…			Body Weight: Significantly lower than control body weights and body weight gains were noted for males in all treatment groups beginning week 1 of the dosing period (Table 82; Fig. 14). The body weight effects were dose-dependent and maximal around weeks 70-78 of the study; by study termination, body weights among treated male groups were comparable to control. For female rats, there was a lower t…	c62e50b0-9aef-4312-b8a7-f19433ff6490	FALSE	{'code': '61025', 'code (mapped)': 'histopathology: non-neoplastic'}	345
229d77fb-d4cd-4ae7-8216-60b0ebbf43f5_dossier.i6z	NDA020838-candesartan cilexetil	145040-37-5	1-cyclohexyloxycarbonyloxyethyl 2-ethoxy-3-[[4-[2-(2H-tetrazol-5-yl)phenyl]phenyl]methyl]benzimidazole-4-carboxylate	v2	NDA020838	CARDIOVASCULAR SYSTEM	a5a28d5d-8005-401b-9e14-65a818f42c51	229d77fb-d4cd-4ae7-8216-60b0ebbf43f5	46161440	90aae7e9-43dd-4c14-b877-e99f3ed797f4	Carcinogenicity	61277	carcinogenicity: oral	1895	experimental study				{"AdministrativeData": {"Endpoint": {"code": "61277"}, "StudyResultType": {"code": "1895"}, "RobustStudy": false, "UsedForClassification": false, "UsedForMSDS": false}, "MaterialsAndMethods": {"TestMaterials": {"TestMaterialInformation": "0260d68a-deaa-4ec5-ac20-3470b5c643a3/a5a28d5d-8005-401b-9e14-65a818f42c51", "SpecificDetailsOnTestMaterialUsedForTheStudy": "Lot#M464-013,-104, -015, -016, -017…	rat	other:F344/Jcl	oral: feed	24 months	not specified	None mg/kg bw/day (actual dose received), 300.0 mg/kg bw/day (actual dose received), 100.0 mg/kg bw/day (actual dose received), 1000.0 mg/kg bw/day (actual dose received)	Significantly lower than control body weights and body weight gains were noted for males in all treatment groups beginning week 1 of the dosing period (Table 82; Fig. 14). The body weight effects were dose-dependent and maximal around weeks 70-78 of the study; by study termination, body weights among treated male groups were comparable to control. For female rats, there was a lower than control b…				Significantly lower than control food consumption was noted for males in all treatment groups throughout the first 74 weeks of the study; by week 78, only the mid dose and high dose males showed significantly lower than control food consumption. Food consumption by candesartan cilexetil-treated females was comparable to control throughout most of the study (Table 83).		Higher than control incidences of an enlarged spleen and a rough kidney surface were noted in high dose males'(Table 86). The incidences of all other macroscopic lesions were comparable among control and treated groups.	Slight and non-dose-related, but significantly lower than control numbers of platelets were noted in males in all the treatment groups. Slight and non-significantly lower than control erythroid values were noted in females treated with 100 mg candesartan cilexetil/kg/day (Table 85).	Increase above control incidences of juxtaglomerular cell hypertrophy and intimal proliferation in the interlobular arteries of the kidney were observed in candesartan cilexetil- treated groups. Also, increases above control incidence and severity of atrophy of zona glomerulosa cells in the adrenal glands were observed in candesartan-treated rats of both sexes from all treated groups (91). The in…	The sponsor’s analysis revealed that the numbers of tumor-bearing animals and total primary neoplasms including benign, malignant and hematopoietic neoplasms were not significantly affected by candesartan cilexetil treatment (Table 87)._x000D_ _x000D_ In female rats treated with candesartan cilexetil, the incidence of pheochromocytoma (benign), showed a positive trend (p= 0.044) and there were st…						Forty-six male rats and 44 female rats died or were killed in extremis during the course of the study. There were no significant differences in survival rates among the control and treated groups of either sex (Table 81, Fig 13).	Body Weight: Significantly lower than control body weights and body weight gains were noted for males in all treatment groups beginning week 1 of the dosing period (Table 82; Fig. 14). The body weight effects were dose-dependent and maximal around weeks 70-78 of the study; by study termination, body weights among treated male groups were comparable to control. For female rats, there was a lower t…			Body Weight: Significantly lower than control body weights and body weight gains were noted for males in all treatment groups beginning week 1 of the dosing period (Table 82; Fig. 14). The body weight effects were dose-dependent and maximal around weeks 70-78 of the study; by study termination, body weights among treated male groups were comparable to control. For female rats, there was a lower t…	e13dee48-9857-4940-b3d3-ab76aa2091a7	FALSE	{'code': '61017', 'code (mapped)': 'haematology'}	345
229d77fb-d4cd-4ae7-8216-60b0ebbf43f5_dossier.i6z	NDA020838-candesartan cilexetil	145040-37-5	1-cyclohexyloxycarbonyloxyethyl 2-ethoxy-3-[[4-[2-(2H-tetrazol-5-yl)phenyl]phenyl]methyl]benzimidazole-4-carboxylate	v2	NDA020838	CARDIOVASCULAR SYSTEM	a5a28d5d-8005-401b-9e14-65a818f42c51	229d77fb-d4cd-4ae7-8216-60b0ebbf43f5	46161440	90aae7e9-43dd-4c14-b877-e99f3ed797f4	Carcinogenicity	61277	carcinogenicity: oral	1895	experimental study				{"AdministrativeData": {"Endpoint": {"code": "61277"}, "StudyResultType": {"code": "1895"}, "RobustStudy": false, "UsedForClassification": false, "UsedForMSDS": false}, "MaterialsAndMethods": {"TestMaterials": {"TestMaterialInformation": "0260d68a-deaa-4ec5-ac20-3470b5c643a3/a5a28d5d-8005-401b-9e14-65a818f42c51", "SpecificDetailsOnTestMaterialUsedForTheStudy": "Lot#M464-013,-104, -015, -016, -017…	rat	other:F344/Jcl	oral: feed	24 months	not specified	None mg/kg bw/day (actual dose received), 300.0 mg/kg bw/day (actual dose received), 100.0 mg/kg bw/day (actual dose received), 1000.0 mg/kg bw/day (actual dose received)	Significantly lower than control body weights and body weight gains were noted for males in all treatment groups beginning week 1 of the dosing period (Table 82; Fig. 14). The body weight effects were dose-dependent and maximal around weeks 70-78 of the study; by study termination, body weights among treated male groups were comparable to control. For female rats, there was a lower than control b…				Significantly lower than control food consumption was noted for males in all treatment groups throughout the first 74 weeks of the study; by week 78, only the mid dose and high dose males showed significantly lower than control food consumption. Food consumption by candesartan cilexetil-treated females was comparable to control throughout most of the study (Table 83).		Higher than control incidences of an enlarged spleen and a rough kidney surface were noted in high dose males'(Table 86). The incidences of all other macroscopic lesions were comparable among control and treated groups.	Slight and non-dose-related, but significantly lower than control numbers of platelets were noted in males in all the treatment groups. Slight and non-significantly lower than control erythroid values were noted in females treated with 100 mg candesartan cilexetil/kg/day (Table 85).	Increase above control incidences of juxtaglomerular cell hypertrophy and intimal proliferation in the interlobular arteries of the kidney were observed in candesartan cilexetil- treated groups. Also, increases above control incidence and severity of atrophy of zona glomerulosa cells in the adrenal glands were observed in candesartan-treated rats of both sexes from all treated groups (91). The in…	The sponsor’s analysis revealed that the numbers of tumor-bearing animals and total primary neoplasms including benign, malignant and hematopoietic neoplasms were not significantly affected by candesartan cilexetil treatment (Table 87)._x000D_ _x000D_ In female rats treated with candesartan cilexetil, the incidence of pheochromocytoma (benign), showed a positive trend (p= 0.044) and there were st…						Forty-six male rats and 44 female rats died or were killed in extremis during the course of the study. There were no significant differences in survival rates among the control and treated groups of either sex (Table 81, Fig 13).	Body Weight: Significantly lower than control body weights and body weight gains were noted for males in all treatment groups beginning week 1 of the dosing period (Table 82; Fig. 14). The body weight effects were dose-dependent and maximal around weeks 70-78 of the study; by study termination, body weights among treated male groups were comparable to control. For female rats, there was a lower t…			Body Weight: Significantly lower than control body weights and body weight gains were noted for males in all treatment groups beginning week 1 of the dosing period (Table 82; Fig. 14). The body weight effects were dose-dependent and maximal around weeks 70-78 of the study; by study termination, body weights among treated male groups were comparable to control. For female rats, there was a lower t…	e13dee48-9857-4940-b3d3-ab76aa2091a7	FALSE	{'code': '61017', 'code (mapped)': 'haematology'}	345
229d77fb-d4cd-4ae7-8216-60b0ebbf43f5_dossier.i6z	NDA020838-candesartan cilexetil	145040-37-5	1-cyclohexyloxycarbonyloxyethyl 2-ethoxy-3-[[4-[2-(2H-tetrazol-5-yl)phenyl]phenyl]methyl]benzimidazole-4-carboxylate	v2	NDA020838	CARDIOVASCULAR SYSTEM	a5a28d5d-8005-401b-9e14-65a818f42c51	229d77fb-d4cd-4ae7-8216-60b0ebbf43f5	46161435	35ae3f90-b204-412a-9b06-1e0993d97cb0	Carcinogenicity	61277	carcinogenicity: oral	1895	experimental study				{"AdministrativeData": {"Endpoint": {"code": "61277"}, "StudyResultType": {"code": "1895"}, "RobustStudy": false, "UsedForClassification": false, "UsedForMSDS": false}, "MaterialsAndMethods": {"TestMaterials": {"TestMaterialInformation": "0260d68a-deaa-4ec5-ac20-3470b5c643a3/a5a28d5d-8005-401b-9e14-65a818f42c51", "SpecificDetailsOnTestMaterialUsedForTheStudy": "Lot #M464-010"}, "TestAnimals": {"S…	rat	other:F344/Jcl	oral: feed	13 weeks	not specified	1000.0 mg/kg bw/day (actual dose received), 300.0 mg/kg bw/day (actual dose received), None mg/kg bw/day (actual dose received), 3000.0 mg/kg bw/day (actual dose received)	Significantly lower than control body weights were observed for males treated with 1000 and 3000 mg candesartan cilexetil/kg/day from week 2 to week 13 of dosing (Fig. 12, Table 73). Slightly lower than control body weights were observed for females in the 3000 mg/kg dose group; however, the latter difference was not statistically significant. The gains from initial body weights to those at week …	Plasma urea nitrogen was increased in each treated group except for females in the 300 mg/kg/day group. Plasma LDH, AST and ALT values in females given 1000 and 3000 mg candesartan cilexetil/kg/day were higher than control (Table 77). In males, higher than control levels of inorganic phosphorus were noted in all candesartan cilexetil- treated groups, and higher than control levels of cholesterol …			A statistically significant reduction from control food consumption was observed for males in each treated group from week 1 through week 6; thereafter, statistically significant reductions were noted sporadically in the 1000 mg/kg group. No treatment- related effects on food consumption were noted for female rats (Table 74)._x000D_ _x000D_ _x000D_ _x000D_ Drug intake during week 1 was below the …			Lower than control values in erythrocyte counts, hemoglobin concentration and hematocrit were observed in females receiving 300 mg candesartan cilexetil/kg/day and in both sexes receiving 1000 and 3000 mg candesartan cilexetil/kg/day (Table 76).	Higher than control incidences of hypertrophy of the juxtaglomerular (JG) cells and intimal proliferation of the interlobular artery in the kidney were observed in candesartan cilexetil- treated groups (Table 79). The severity of JG cell hypertrophy seen with 300 mg candesartan cilexetil/kg/day in males (mild hypertrophy in 7/10 and moderate hypertrophy in 3/30) increased with higher doses (mild …			Lower than control heart weight and higher than control relative kidney weights were noted in each treated group for both sexes (Table 78).	Urine values (pH, protein, ketones, urobilinogen and incidence of occult blood, erythrocytes, leukocytes and epithelial cells) in treated animals were comparable to those of control.				Results_x000D_ Mortality and Clinical Signs: No animals died during the study. No treatment-related clinical signs of toxicity were observed. _x000D_ Body Weight: Significantly lower than control body weights were observed for males treated with 1000 and 3000 mg candesartan cilexetil/kg/day from week 2 to week 13 of dosing (Fig. 12, Table 73). Slightly lower than control body weights were observe…			Results_x000D_ Mortality and Clinical Signs: No animals died during the study. No treatment-related clinical signs of toxicity were observed. _x000D_ Body Weight: Significantly lower than control body weights were observed for males treated with 1000 and 3000 mg candesartan cilexetil/kg/day from week 2 to week 13 of dosing (Fig. 12, Table 73). Slightly lower than control body weights were observe…	00a34d7a-e441-41ed-886d-9362da4a8388	FALSE	{'code': '61017', 'code (mapped)': 'haematology'}	345
229d77fb-d4cd-4ae7-8216-60b0ebbf43f5_dossier.i6z	NDA020838-candesartan cilexetil	145040-37-5	1-cyclohexyloxycarbonyloxyethyl 2-ethoxy-3-[[4-[2-(2H-tetrazol-5-yl)phenyl]phenyl]methyl]benzimidazole-4-carboxylate	v2	NDA020838	CARDIOVASCULAR SYSTEM	a5a28d5d-8005-401b-9e14-65a818f42c51	229d77fb-d4cd-4ae7-8216-60b0ebbf43f5	46161435	35ae3f90-b204-412a-9b06-1e0993d97cb0	Carcinogenicity	61277	carcinogenicity: oral	1895	experimental study				{"AdministrativeData": {"Endpoint": {"code": "61277"}, "StudyResultType": {"code": "1895"}, "RobustStudy": false, "UsedForClassification": false, "UsedForMSDS": false}, "MaterialsAndMethods": {"TestMaterials": {"TestMaterialInformation": "0260d68a-deaa-4ec5-ac20-3470b5c643a3/a5a28d5d-8005-401b-9e14-65a818f42c51", "SpecificDetailsOnTestMaterialUsedForTheStudy": "Lot #M464-010"}, "TestAnimals": {"S…	rat	other:F344/Jcl	oral: feed	13 weeks	not specified	1000.0 mg/kg bw/day (actual dose received), 300.0 mg/kg bw/day (actual dose received), None mg/kg bw/day (actual dose received), 3000.0 mg/kg bw/day (actual dose received)	Significantly lower than control body weights were observed for males treated with 1000 and 3000 mg candesartan cilexetil/kg/day from week 2 to week 13 of dosing (Fig. 12, Table 73). Slightly lower than control body weights were observed for females in the 3000 mg/kg dose group; however, the latter difference was not statistically significant. The gains from initial body weights to those at week …	Plasma urea nitrogen was increased in each treated group except for females in the 300 mg/kg/day group. Plasma LDH, AST and ALT values in females given 1000 and 3000 mg candesartan cilexetil/kg/day were higher than control (Table 77). In males, higher than control levels of inorganic phosphorus were noted in all candesartan cilexetil- treated groups, and higher than control levels of cholesterol …			A statistically significant reduction from control food consumption was observed for males in each treated group from week 1 through week 6; thereafter, statistically significant reductions were noted sporadically in the 1000 mg/kg group. No treatment- related effects on food consumption were noted for female rats (Table 74)._x000D_ _x000D_ _x000D_ _x000D_ Drug intake during week 1 was below the …			Lower than control values in erythrocyte counts, hemoglobin concentration and hematocrit were observed in females receiving 300 mg candesartan cilexetil/kg/day and in both sexes receiving 1000 and 3000 mg candesartan cilexetil/kg/day (Table 76).	Higher than control incidences of hypertrophy of the juxtaglomerular (JG) cells and intimal proliferation of the interlobular artery in the kidney were observed in candesartan cilexetil- treated groups (Table 79). The severity of JG cell hypertrophy seen with 300 mg candesartan cilexetil/kg/day in males (mild hypertrophy in 7/10 and moderate hypertrophy in 3/30) increased with higher doses (mild …			Lower than control heart weight and higher than control relative kidney weights were noted in each treated group for both sexes (Table 78).	Urine values (pH, protein, ketones, urobilinogen and incidence of occult blood, erythrocytes, leukocytes and epithelial cells) in treated animals were comparable to those of control.				Results_x000D_ Mortality and Clinical Signs: No animals died during the study. No treatment-related clinical signs of toxicity were observed. _x000D_ Body Weight: Significantly lower than control body weights were observed for males treated with 1000 and 3000 mg candesartan cilexetil/kg/day from week 2 to week 13 of dosing (Fig. 12, Table 73). Slightly lower than control body weights were observe…			Results_x000D_ Mortality and Clinical Signs: No animals died during the study. No treatment-related clinical signs of toxicity were observed. _x000D_ Body Weight: Significantly lower than control body weights were observed for males treated with 1000 and 3000 mg candesartan cilexetil/kg/day from week 2 to week 13 of dosing (Fig. 12, Table 73). Slightly lower than control body weights were observe…	0b9cfec3-b8f8-44fb-bb1a-398158a30aa2	FALSE	{'code': '61022', 'code (mapped)': 'organ weights and organ / body weight ratios'}	345
229d77fb-d4cd-4ae7-8216-60b0ebbf43f5_dossier.i6z	NDA020838-candesartan cilexetil	145040-37-5	1-cyclohexyloxycarbonyloxyethyl 2-ethoxy-3-[[4-[2-(2H-tetrazol-5-yl)phenyl]phenyl]methyl]benzimidazole-4-carboxylate	v2	NDA020838	CARDIOVASCULAR SYSTEM	a5a28d5d-8005-401b-9e14-65a818f42c51	229d77fb-d4cd-4ae7-8216-60b0ebbf43f5	46161435	35ae3f90-b204-412a-9b06-1e0993d97cb0	Carcinogenicity	61277	carcinogenicity: oral	1895	experimental study				{"AdministrativeData": {"Endpoint": {"code": "61277"}, "StudyResultType": {"code": "1895"}, "RobustStudy": false, "UsedForClassification": false, "UsedForMSDS": false}, "MaterialsAndMethods": {"TestMaterials": {"TestMaterialInformation": "0260d68a-deaa-4ec5-ac20-3470b5c643a3/a5a28d5d-8005-401b-9e14-65a818f42c51", "SpecificDetailsOnTestMaterialUsedForTheStudy": "Lot #M464-010"}, "TestAnimals": {"S…	rat	other:F344/Jcl	oral: feed	13 weeks	not specified	1000.0 mg/kg bw/day (actual dose received), 300.0 mg/kg bw/day (actual dose received), None mg/kg bw/day (actual dose received), 3000.0 mg/kg bw/day (actual dose received)	Significantly lower than control body weights were observed for males treated with 1000 and 3000 mg candesartan cilexetil/kg/day from week 2 to week 13 of dosing (Fig. 12, Table 73). Slightly lower than control body weights were observed for females in the 3000 mg/kg dose group; however, the latter difference was not statistically significant. The gains from initial body weights to those at week …	Plasma urea nitrogen was increased in each treated group except for females in the 300 mg/kg/day group. Plasma LDH, AST and ALT values in females given 1000 and 3000 mg candesartan cilexetil/kg/day were higher than control (Table 77). In males, higher than control levels of inorganic phosphorus were noted in all candesartan cilexetil- treated groups, and higher than control levels of cholesterol …			A statistically significant reduction from control food consumption was observed for males in each treated group from week 1 through week 6; thereafter, statistically significant reductions were noted sporadically in the 1000 mg/kg group. No treatment- related effects on food consumption were noted for female rats (Table 74)._x000D_ _x000D_ _x000D_ _x000D_ Drug intake during week 1 was below the …			Lower than control values in erythrocyte counts, hemoglobin concentration and hematocrit were observed in females receiving 300 mg candesartan cilexetil/kg/day and in both sexes receiving 1000 and 3000 mg candesartan cilexetil/kg/day (Table 76).	Higher than control incidences of hypertrophy of the juxtaglomerular (JG) cells and intimal proliferation of the interlobular artery in the kidney were observed in candesartan cilexetil- treated groups (Table 79). The severity of JG cell hypertrophy seen with 300 mg candesartan cilexetil/kg/day in males (mild hypertrophy in 7/10 and moderate hypertrophy in 3/30) increased with higher doses (mild …			Lower than control heart weight and higher than control relative kidney weights were noted in each treated group for both sexes (Table 78).	Urine values (pH, protein, ketones, urobilinogen and incidence of occult blood, erythrocytes, leukocytes and epithelial cells) in treated animals were comparable to those of control.				Results_x000D_ Mortality and Clinical Signs: No animals died during the study. No treatment-related clinical signs of toxicity were observed. _x000D_ Body Weight: Significantly lower than control body weights were observed for males treated with 1000 and 3000 mg candesartan cilexetil/kg/day from week 2 to week 13 of dosing (Fig. 12, Table 73). Slightly lower than control body weights were observe…			Results_x000D_ Mortality and Clinical Signs: No animals died during the study. No treatment-related clinical signs of toxicity were observed. _x000D_ Body Weight: Significantly lower than control body weights were observed for males treated with 1000 and 3000 mg candesartan cilexetil/kg/day from week 2 to week 13 of dosing (Fig. 12, Table 73). Slightly lower than control body weights were observe…	0b9cfec3-b8f8-44fb-bb1a-398158a30aa2	FALSE	{'code': '61022', 'code (mapped)': 'organ weights and organ / body weight ratios'}	345
229d77fb-d4cd-4ae7-8216-60b0ebbf43f5_dossier.i6z	NDA020838-candesartan cilexetil	145040-37-5	1-cyclohexyloxycarbonyloxyethyl 2-ethoxy-3-[[4-[2-(2H-tetrazol-5-yl)phenyl]phenyl]methyl]benzimidazole-4-carboxylate	v2	NDA020838	CARDIOVASCULAR SYSTEM	a5a28d5d-8005-401b-9e14-65a818f42c51	229d77fb-d4cd-4ae7-8216-60b0ebbf43f5	46161435	35ae3f90-b204-412a-9b06-1e0993d97cb0	Carcinogenicity	61277	carcinogenicity: oral	1895	experimental study				{"AdministrativeData": {"Endpoint": {"code": "61277"}, "StudyResultType": {"code": "1895"}, "RobustStudy": false, "UsedForClassification": false, "UsedForMSDS": false}, "MaterialsAndMethods": {"TestMaterials": {"TestMaterialInformation": "0260d68a-deaa-4ec5-ac20-3470b5c643a3/a5a28d5d-8005-401b-9e14-65a818f42c51", "SpecificDetailsOnTestMaterialUsedForTheStudy": "Lot #M464-010"}, "TestAnimals": {"S…	rat	other:F344/Jcl	oral: feed	13 weeks	not specified	1000.0 mg/kg bw/day (actual dose received), 300.0 mg/kg bw/day (actual dose received), None mg/kg bw/day (actual dose received), 3000.0 mg/kg bw/day (actual dose received)	Significantly lower than control body weights were observed for males treated with 1000 and 3000 mg candesartan cilexetil/kg/day from week 2 to week 13 of dosing (Fig. 12, Table 73). Slightly lower than control body weights were observed for females in the 3000 mg/kg dose group; however, the latter difference was not statistically significant. The gains from initial body weights to those at week …	Plasma urea nitrogen was increased in each treated group except for females in the 300 mg/kg/day group. Plasma LDH, AST and ALT values in females given 1000 and 3000 mg candesartan cilexetil/kg/day were higher than control (Table 77). In males, higher than control levels of inorganic phosphorus were noted in all candesartan cilexetil- treated groups, and higher than control levels of cholesterol …			A statistically significant reduction from control food consumption was observed for males in each treated group from week 1 through week 6; thereafter, statistically significant reductions were noted sporadically in the 1000 mg/kg group. No treatment- related effects on food consumption were noted for female rats (Table 74)._x000D_ _x000D_ _x000D_ _x000D_ Drug intake during week 1 was below the …			Lower than control values in erythrocyte counts, hemoglobin concentration and hematocrit were observed in females receiving 300 mg candesartan cilexetil/kg/day and in both sexes receiving 1000 and 3000 mg candesartan cilexetil/kg/day (Table 76).	Higher than control incidences of hypertrophy of the juxtaglomerular (JG) cells and intimal proliferation of the interlobular artery in the kidney were observed in candesartan cilexetil- treated groups (Table 79). The severity of JG cell hypertrophy seen with 300 mg candesartan cilexetil/kg/day in males (mild hypertrophy in 7/10 and moderate hypertrophy in 3/30) increased with higher doses (mild …			Lower than control heart weight and higher than control relative kidney weights were noted in each treated group for both sexes (Table 78).	Urine values (pH, protein, ketones, urobilinogen and incidence of occult blood, erythrocytes, leukocytes and epithelial cells) in treated animals were comparable to those of control.				Results_x000D_ Mortality and Clinical Signs: No animals died during the study. No treatment-related clinical signs of toxicity were observed. _x000D_ Body Weight: Significantly lower than control body weights were observed for males treated with 1000 and 3000 mg candesartan cilexetil/kg/day from week 2 to week 13 of dosing (Fig. 12, Table 73). Slightly lower than control body weights were observe…			Results_x000D_ Mortality and Clinical Signs: No animals died during the study. No treatment-related clinical signs of toxicity were observed. _x000D_ Body Weight: Significantly lower than control body weights were observed for males treated with 1000 and 3000 mg candesartan cilexetil/kg/day from week 2 to week 13 of dosing (Fig. 12, Table 73). Slightly lower than control body weights were observe…	0f9087d2-dd48-491f-b409-61d5b7d251a2	FALSE	{'code': '61017', 'code (mapped)': 'haematology'}	345
229d77fb-d4cd-4ae7-8216-60b0ebbf43f5_dossier.i6z	NDA020838-candesartan cilexetil	145040-37-5	1-cyclohexyloxycarbonyloxyethyl 2-ethoxy-3-[[4-[2-(2H-tetrazol-5-yl)phenyl]phenyl]methyl]benzimidazole-4-carboxylate	v2	NDA020838	CARDIOVASCULAR SYSTEM	a5a28d5d-8005-401b-9e14-65a818f42c51	229d77fb-d4cd-4ae7-8216-60b0ebbf43f5	46161435	35ae3f90-b204-412a-9b06-1e0993d97cb0	Carcinogenicity	61277	carcinogenicity: oral	1895	experimental study				{"AdministrativeData": {"Endpoint": {"code": "61277"}, "StudyResultType": {"code": "1895"}, "RobustStudy": false, "UsedForClassification": false, "UsedForMSDS": false}, "MaterialsAndMethods": {"TestMaterials": {"TestMaterialInformation": "0260d68a-deaa-4ec5-ac20-3470b5c643a3/a5a28d5d-8005-401b-9e14-65a818f42c51", "SpecificDetailsOnTestMaterialUsedForTheStudy": "Lot #M464-010"}, "TestAnimals": {"S…	rat	other:F344/Jcl	oral: feed	13 weeks	not specified	1000.0 mg/kg bw/day (actual dose received), 300.0 mg/kg bw/day (actual dose received), None mg/kg bw/day (actual dose received), 3000.0 mg/kg bw/day (actual dose received)	Significantly lower than control body weights were observed for males treated with 1000 and 3000 mg candesartan cilexetil/kg/day from week 2 to week 13 of dosing (Fig. 12, Table 73). Slightly lower than control body weights were observed for females in the 3000 mg/kg dose group; however, the latter difference was not statistically significant. The gains from initial body weights to those at week …	Plasma urea nitrogen was increased in each treated group except for females in the 300 mg/kg/day group. Plasma LDH, AST and ALT values in females given 1000 and 3000 mg candesartan cilexetil/kg/day were higher than control (Table 77). In males, higher than control levels of inorganic phosphorus were noted in all candesartan cilexetil- treated groups, and higher than control levels of cholesterol …			A statistically significant reduction from control food consumption was observed for males in each treated group from week 1 through week 6; thereafter, statistically significant reductions were noted sporadically in the 1000 mg/kg group. No treatment- related effects on food consumption were noted for female rats (Table 74)._x000D_ _x000D_ _x000D_ _x000D_ Drug intake during week 1 was below the …			Lower than control values in erythrocyte counts, hemoglobin concentration and hematocrit were observed in females receiving 300 mg candesartan cilexetil/kg/day and in both sexes receiving 1000 and 3000 mg candesartan cilexetil/kg/day (Table 76).	Higher than control incidences of hypertrophy of the juxtaglomerular (JG) cells and intimal proliferation of the interlobular artery in the kidney were observed in candesartan cilexetil- treated groups (Table 79). The severity of JG cell hypertrophy seen with 300 mg candesartan cilexetil/kg/day in males (mild hypertrophy in 7/10 and moderate hypertrophy in 3/30) increased with higher doses (mild …			Lower than control heart weight and higher than control relative kidney weights were noted in each treated group for both sexes (Table 78).	Urine values (pH, protein, ketones, urobilinogen and incidence of occult blood, erythrocytes, leukocytes and epithelial cells) in treated animals were comparable to those of control.				Results_x000D_ Mortality and Clinical Signs: No animals died during the study. No treatment-related clinical signs of toxicity were observed. _x000D_ Body Weight: Significantly lower than control body weights were observed for males treated with 1000 and 3000 mg candesartan cilexetil/kg/day from week 2 to week 13 of dosing (Fig. 12, Table 73). Slightly lower than control body weights were observe…			Results_x000D_ Mortality and Clinical Signs: No animals died during the study. No treatment-related clinical signs of toxicity were observed. _x000D_ Body Weight: Significantly lower than control body weights were observed for males treated with 1000 and 3000 mg candesartan cilexetil/kg/day from week 2 to week 13 of dosing (Fig. 12, Table 73). Slightly lower than control body weights were observe…	0f9087d2-dd48-491f-b409-61d5b7d251a2	FALSE	{'code': '61017', 'code (mapped)': 'haematology'}	345
229d77fb-d4cd-4ae7-8216-60b0ebbf43f5_dossier.i6z	NDA020838-candesartan cilexetil	145040-37-5	1-cyclohexyloxycarbonyloxyethyl 2-ethoxy-3-[[4-[2-(2H-tetrazol-5-yl)phenyl]phenyl]methyl]benzimidazole-4-carboxylate	v2	NDA020838	CARDIOVASCULAR SYSTEM	a5a28d5d-8005-401b-9e14-65a818f42c51	229d77fb-d4cd-4ae7-8216-60b0ebbf43f5	46161435	35ae3f90-b204-412a-9b06-1e0993d97cb0	Carcinogenicity	61277	carcinogenicity: oral	1895	experimental study				{"AdministrativeData": {"Endpoint": {"code": "61277"}, "StudyResultType": {"code": "1895"}, "RobustStudy": false, "UsedForClassification": false, "UsedForMSDS": false}, "MaterialsAndMethods": {"TestMaterials": {"TestMaterialInformation": "0260d68a-deaa-4ec5-ac20-3470b5c643a3/a5a28d5d-8005-401b-9e14-65a818f42c51", "SpecificDetailsOnTestMaterialUsedForTheStudy": "Lot #M464-010"}, "TestAnimals": {"S…	rat	other:F344/Jcl	oral: feed	13 weeks	not specified	1000.0 mg/kg bw/day (actual dose received), 300.0 mg/kg bw/day (actual dose received), None mg/kg bw/day (actual dose received), 3000.0 mg/kg bw/day (actual dose received)	Significantly lower than control body weights were observed for males treated with 1000 and 3000 mg candesartan cilexetil/kg/day from week 2 to week 13 of dosing (Fig. 12, Table 73). Slightly lower than control body weights were observed for females in the 3000 mg/kg dose group; however, the latter difference was not statistically significant. The gains from initial body weights to those at week …	Plasma urea nitrogen was increased in each treated group except for females in the 300 mg/kg/day group. Plasma LDH, AST and ALT values in females given 1000 and 3000 mg candesartan cilexetil/kg/day were higher than control (Table 77). In males, higher than control levels of inorganic phosphorus were noted in all candesartan cilexetil- treated groups, and higher than control levels of cholesterol …			A statistically significant reduction from control food consumption was observed for males in each treated group from week 1 through week 6; thereafter, statistically significant reductions were noted sporadically in the 1000 mg/kg group. No treatment- related effects on food consumption were noted for female rats (Table 74)._x000D_ _x000D_ _x000D_ _x000D_ Drug intake during week 1 was below the …			Lower than control values in erythrocyte counts, hemoglobin concentration and hematocrit were observed in females receiving 300 mg candesartan cilexetil/kg/day and in both sexes receiving 1000 and 3000 mg candesartan cilexetil/kg/day (Table 76).	Higher than control incidences of hypertrophy of the juxtaglomerular (JG) cells and intimal proliferation of the interlobular artery in the kidney were observed in candesartan cilexetil- treated groups (Table 79). The severity of JG cell hypertrophy seen with 300 mg candesartan cilexetil/kg/day in males (mild hypertrophy in 7/10 and moderate hypertrophy in 3/30) increased with higher doses (mild …			Lower than control heart weight and higher than control relative kidney weights were noted in each treated group for both sexes (Table 78).	Urine values (pH, protein, ketones, urobilinogen and incidence of occult blood, erythrocytes, leukocytes and epithelial cells) in treated animals were comparable to those of control.				Results_x000D_ Mortality and Clinical Signs: No animals died during the study. No treatment-related clinical signs of toxicity were observed. _x000D_ Body Weight: Significantly lower than control body weights were observed for males treated with 1000 and 3000 mg candesartan cilexetil/kg/day from week 2 to week 13 of dosing (Fig. 12, Table 73). Slightly lower than control body weights were observe…			Results_x000D_ Mortality and Clinical Signs: No animals died during the study. No treatment-related clinical signs of toxicity were observed. _x000D_ Body Weight: Significantly lower than control body weights were observed for males treated with 1000 and 3000 mg candesartan cilexetil/kg/day from week 2 to week 13 of dosing (Fig. 12, Table 73). Slightly lower than control body weights were observe…	1a5a9717-a12b-4ab5-b80a-5cfbbece4c98	FALSE	{'code': '61018', 'code (mapped)': 'clinical biochemistry'}	345
229d77fb-d4cd-4ae7-8216-60b0ebbf43f5_dossier.i6z	NDA020838-candesartan cilexetil	145040-37-5	1-cyclohexyloxycarbonyloxyethyl 2-ethoxy-3-[[4-[2-(2H-tetrazol-5-yl)phenyl]phenyl]methyl]benzimidazole-4-carboxylate	v2	NDA020838	CARDIOVASCULAR SYSTEM	a5a28d5d-8005-401b-9e14-65a818f42c51	229d77fb-d4cd-4ae7-8216-60b0ebbf43f5	46161435	35ae3f90-b204-412a-9b06-1e0993d97cb0	Carcinogenicity	61277	carcinogenicity: oral	1895	experimental study				{"AdministrativeData": {"Endpoint": {"code": "61277"}, "StudyResultType": {"code": "1895"}, "RobustStudy": false, "UsedForClassification": false, "UsedForMSDS": false}, "MaterialsAndMethods": {"TestMaterials": {"TestMaterialInformation": "0260d68a-deaa-4ec5-ac20-3470b5c643a3/a5a28d5d-8005-401b-9e14-65a818f42c51", "SpecificDetailsOnTestMaterialUsedForTheStudy": "Lot #M464-010"}, "TestAnimals": {"S…	rat	other:F344/Jcl	oral: feed	13 weeks	not specified	1000.0 mg/kg bw/day (actual dose received), 300.0 mg/kg bw/day (actual dose received), None mg/kg bw/day (actual dose received), 3000.0 mg/kg bw/day (actual dose received)	Significantly lower than control body weights were observed for males treated with 1000 and 3000 mg candesartan cilexetil/kg/day from week 2 to week 13 of dosing (Fig. 12, Table 73). Slightly lower than control body weights were observed for females in the 3000 mg/kg dose group; however, the latter difference was not statistically significant. The gains from initial body weights to those at week …	Plasma urea nitrogen was increased in each treated group except for females in the 300 mg/kg/day group. Plasma LDH, AST and ALT values in females given 1000 and 3000 mg candesartan cilexetil/kg/day were higher than control (Table 77). In males, higher than control levels of inorganic phosphorus were noted in all candesartan cilexetil- treated groups, and higher than control levels of cholesterol …			A statistically significant reduction from control food consumption was observed for males in each treated group from week 1 through week 6; thereafter, statistically significant reductions were noted sporadically in the 1000 mg/kg group. No treatment- related effects on food consumption were noted for female rats (Table 74)._x000D_ _x000D_ _x000D_ _x000D_ Drug intake during week 1 was below the …			Lower than control values in erythrocyte counts, hemoglobin concentration and hematocrit were observed in females receiving 300 mg candesartan cilexetil/kg/day and in both sexes receiving 1000 and 3000 mg candesartan cilexetil/kg/day (Table 76).	Higher than control incidences of hypertrophy of the juxtaglomerular (JG) cells and intimal proliferation of the interlobular artery in the kidney were observed in candesartan cilexetil- treated groups (Table 79). The severity of JG cell hypertrophy seen with 300 mg candesartan cilexetil/kg/day in males (mild hypertrophy in 7/10 and moderate hypertrophy in 3/30) increased with higher doses (mild …			Lower than control heart weight and higher than control relative kidney weights were noted in each treated group for both sexes (Table 78).	Urine values (pH, protein, ketones, urobilinogen and incidence of occult blood, erythrocytes, leukocytes and epithelial cells) in treated animals were comparable to those of control.				Results_x000D_ Mortality and Clinical Signs: No animals died during the study. No treatment-related clinical signs of toxicity were observed. _x000D_ Body Weight: Significantly lower than control body weights were observed for males treated with 1000 and 3000 mg candesartan cilexetil/kg/day from week 2 to week 13 of dosing (Fig. 12, Table 73). Slightly lower than control body weights were observe…			Results_x000D_ Mortality and Clinical Signs: No animals died during the study. No treatment-related clinical signs of toxicity were observed. _x000D_ Body Weight: Significantly lower than control body weights were observed for males treated with 1000 and 3000 mg candesartan cilexetil/kg/day from week 2 to week 13 of dosing (Fig. 12, Table 73). Slightly lower than control body weights were observe…	1ce8a157-d0dc-4169-ad59-8e341ca22797	FALSE	{'code': '61017', 'code (mapped)': 'haematology'}	345
229d77fb-d4cd-4ae7-8216-60b0ebbf43f5_dossier.i6z	NDA020838-candesartan cilexetil	145040-37-5	1-cyclohexyloxycarbonyloxyethyl 2-ethoxy-3-[[4-[2-(2H-tetrazol-5-yl)phenyl]phenyl]methyl]benzimidazole-4-carboxylate	v2	NDA020838	CARDIOVASCULAR SYSTEM	a5a28d5d-8005-401b-9e14-65a818f42c51	229d77fb-d4cd-4ae7-8216-60b0ebbf43f5	46161435	35ae3f90-b204-412a-9b06-1e0993d97cb0	Carcinogenicity	61277	carcinogenicity: oral	1895	experimental study				{"AdministrativeData": {"Endpoint": {"code": "61277"}, "StudyResultType": {"code": "1895"}, "RobustStudy": false, "UsedForClassification": false, "UsedForMSDS": false}, "MaterialsAndMethods": {"TestMaterials": {"TestMaterialInformation": "0260d68a-deaa-4ec5-ac20-3470b5c643a3/a5a28d5d-8005-401b-9e14-65a818f42c51", "SpecificDetailsOnTestMaterialUsedForTheStudy": "Lot #M464-010"}, "TestAnimals": {"S…	rat	other:F344/Jcl	oral: feed	13 weeks	not specified	1000.0 mg/kg bw/day (actual dose received), 300.0 mg/kg bw/day (actual dose received), None mg/kg bw/day (actual dose received), 3000.0 mg/kg bw/day (actual dose received)	Significantly lower than control body weights were observed for males treated with 1000 and 3000 mg candesartan cilexetil/kg/day from week 2 to week 13 of dosing (Fig. 12, Table 73). Slightly lower than control body weights were observed for females in the 3000 mg/kg dose group; however, the latter difference was not statistically significant. The gains from initial body weights to those at week …	Plasma urea nitrogen was increased in each treated group except for females in the 300 mg/kg/day group. Plasma LDH, AST and ALT values in females given 1000 and 3000 mg candesartan cilexetil/kg/day were higher than control (Table 77). In males, higher than control levels of inorganic phosphorus were noted in all candesartan cilexetil- treated groups, and higher than control levels of cholesterol …			A statistically significant reduction from control food consumption was observed for males in each treated group from week 1 through week 6; thereafter, statistically significant reductions were noted sporadically in the 1000 mg/kg group. No treatment- related effects on food consumption were noted for female rats (Table 74)._x000D_ _x000D_ _x000D_ _x000D_ Drug intake during week 1 was below the …			Lower than control values in erythrocyte counts, hemoglobin concentration and hematocrit were observed in females receiving 300 mg candesartan cilexetil/kg/day and in both sexes receiving 1000 and 3000 mg candesartan cilexetil/kg/day (Table 76).	Higher than control incidences of hypertrophy of the juxtaglomerular (JG) cells and intimal proliferation of the interlobular artery in the kidney were observed in candesartan cilexetil- treated groups (Table 79). The severity of JG cell hypertrophy seen with 300 mg candesartan cilexetil/kg/day in males (mild hypertrophy in 7/10 and moderate hypertrophy in 3/30) increased with higher doses (mild …			Lower than control heart weight and higher than control relative kidney weights were noted in each treated group for both sexes (Table 78).	Urine values (pH, protein, ketones, urobilinogen and incidence of occult blood, erythrocytes, leukocytes and epithelial cells) in treated animals were comparable to those of control.				Results_x000D_ Mortality and Clinical Signs: No animals died during the study. No treatment-related clinical signs of toxicity were observed. _x000D_ Body Weight: Significantly lower than control body weights were observed for males treated with 1000 and 3000 mg candesartan cilexetil/kg/day from week 2 to week 13 of dosing (Fig. 12, Table 73). Slightly lower than control body weights were observe…			Results_x000D_ Mortality and Clinical Signs: No animals died during the study. No treatment-related clinical signs of toxicity were observed. _x000D_ Body Weight: Significantly lower than control body weights were observed for males treated with 1000 and 3000 mg candesartan cilexetil/kg/day from week 2 to week 13 of dosing (Fig. 12, Table 73). Slightly lower than control body weights were observe…	1d95b514-4314-4740-b982-2f153795643d	FALSE	{'code': '61012', 'code (mapped)': 'body weight and weight gain'}	345
229d77fb-d4cd-4ae7-8216-60b0ebbf43f5_dossier.i6z	NDA020838-candesartan cilexetil	145040-37-5	1-cyclohexyloxycarbonyloxyethyl 2-ethoxy-3-[[4-[2-(2H-tetrazol-5-yl)phenyl]phenyl]methyl]benzimidazole-4-carboxylate	v2	NDA020838	CARDIOVASCULAR SYSTEM	a5a28d5d-8005-401b-9e14-65a818f42c51	229d77fb-d4cd-4ae7-8216-60b0ebbf43f5	46161435	35ae3f90-b204-412a-9b06-1e0993d97cb0	Carcinogenicity	61277	carcinogenicity: oral	1895	experimental study				{"AdministrativeData": {"Endpoint": {"code": "61277"}, "StudyResultType": {"code": "1895"}, "RobustStudy": false, "UsedForClassification": false, "UsedForMSDS": false}, "MaterialsAndMethods": {"TestMaterials": {"TestMaterialInformation": "0260d68a-deaa-4ec5-ac20-3470b5c643a3/a5a28d5d-8005-401b-9e14-65a818f42c51", "SpecificDetailsOnTestMaterialUsedForTheStudy": "Lot #M464-010"}, "TestAnimals": {"S…	rat	other:F344/Jcl	oral: feed	13 weeks	not specified	1000.0 mg/kg bw/day (actual dose received), 300.0 mg/kg bw/day (actual dose received), None mg/kg bw/day (actual dose received), 3000.0 mg/kg bw/day (actual dose received)	Significantly lower than control body weights were observed for males treated with 1000 and 3000 mg candesartan cilexetil/kg/day from week 2 to week 13 of dosing (Fig. 12, Table 73). Slightly lower than control body weights were observed for females in the 3000 mg/kg dose group; however, the latter difference was not statistically significant. The gains from initial body weights to those at week …	Plasma urea nitrogen was increased in each treated group except for females in the 300 mg/kg/day group. Plasma LDH, AST and ALT values in females given 1000 and 3000 mg candesartan cilexetil/kg/day were higher than control (Table 77). In males, higher than control levels of inorganic phosphorus were noted in all candesartan cilexetil- treated groups, and higher than control levels of cholesterol …			A statistically significant reduction from control food consumption was observed for males in each treated group from week 1 through week 6; thereafter, statistically significant reductions were noted sporadically in the 1000 mg/kg group. No treatment- related effects on food consumption were noted for female rats (Table 74)._x000D_ _x000D_ _x000D_ _x000D_ Drug intake during week 1 was below the …			Lower than control values in erythrocyte counts, hemoglobin concentration and hematocrit were observed in females receiving 300 mg candesartan cilexetil/kg/day and in both sexes receiving 1000 and 3000 mg candesartan cilexetil/kg/day (Table 76).	Higher than control incidences of hypertrophy of the juxtaglomerular (JG) cells and intimal proliferation of the interlobular artery in the kidney were observed in candesartan cilexetil- treated groups (Table 79). The severity of JG cell hypertrophy seen with 300 mg candesartan cilexetil/kg/day in males (mild hypertrophy in 7/10 and moderate hypertrophy in 3/30) increased with higher doses (mild …			Lower than control heart weight and higher than control relative kidney weights were noted in each treated group for both sexes (Table 78).	Urine values (pH, protein, ketones, urobilinogen and incidence of occult blood, erythrocytes, leukocytes and epithelial cells) in treated animals were comparable to those of control.				Results_x000D_ Mortality and Clinical Signs: No animals died during the study. No treatment-related clinical signs of toxicity were observed. _x000D_ Body Weight: Significantly lower than control body weights were observed for males treated with 1000 and 3000 mg candesartan cilexetil/kg/day from week 2 to week 13 of dosing (Fig. 12, Table 73). Slightly lower than control body weights were observe…			Results_x000D_ Mortality and Clinical Signs: No animals died during the study. No treatment-related clinical signs of toxicity were observed. _x000D_ Body Weight: Significantly lower than control body weights were observed for males treated with 1000 and 3000 mg candesartan cilexetil/kg/day from week 2 to week 13 of dosing (Fig. 12, Table 73). Slightly lower than control body weights were observe…	1d95b514-4314-4740-b982-2f153795643d	FALSE	{'code': '61012', 'code (mapped)': 'body weight and weight gain'}	345
229d77fb-d4cd-4ae7-8216-60b0ebbf43f5_dossier.i6z	NDA020838-candesartan cilexetil	145040-37-5	1-cyclohexyloxycarbonyloxyethyl 2-ethoxy-3-[[4-[2-(2H-tetrazol-5-yl)phenyl]phenyl]methyl]benzimidazole-4-carboxylate	v2	NDA020838	CARDIOVASCULAR SYSTEM	a5a28d5d-8005-401b-9e14-65a818f42c51	229d77fb-d4cd-4ae7-8216-60b0ebbf43f5	46161435	35ae3f90-b204-412a-9b06-1e0993d97cb0	Carcinogenicity	61277	carcinogenicity: oral	1895	experimental study				{"AdministrativeData": {"Endpoint": {"code": "61277"}, "StudyResultType": {"code": "1895"}, "RobustStudy": false, "UsedForClassification": false, "UsedForMSDS": false}, "MaterialsAndMethods": {"TestMaterials": {"TestMaterialInformation": "0260d68a-deaa-4ec5-ac20-3470b5c643a3/a5a28d5d-8005-401b-9e14-65a818f42c51", "SpecificDetailsOnTestMaterialUsedForTheStudy": "Lot #M464-010"}, "TestAnimals": {"S…	rat	other:F344/Jcl	oral: feed	13 weeks	not specified	1000.0 mg/kg bw/day (actual dose received), 300.0 mg/kg bw/day (actual dose received), None mg/kg bw/day (actual dose received), 3000.0 mg/kg bw/day (actual dose received)	Significantly lower than control body weights were observed for males treated with 1000 and 3000 mg candesartan cilexetil/kg/day from week 2 to week 13 of dosing (Fig. 12, Table 73). Slightly lower than control body weights were observed for females in the 3000 mg/kg dose group; however, the latter difference was not statistically significant. The gains from initial body weights to those at week …	Plasma urea nitrogen was increased in each treated group except for females in the 300 mg/kg/day group. Plasma LDH, AST and ALT values in females given 1000 and 3000 mg candesartan cilexetil/kg/day were higher than control (Table 77). In males, higher than control levels of inorganic phosphorus were noted in all candesartan cilexetil- treated groups, and higher than control levels of cholesterol …			A statistically significant reduction from control food consumption was observed for males in each treated group from week 1 through week 6; thereafter, statistically significant reductions were noted sporadically in the 1000 mg/kg group. No treatment- related effects on food consumption were noted for female rats (Table 74)._x000D_ _x000D_ _x000D_ _x000D_ Drug intake during week 1 was below the …			Lower than control values in erythrocyte counts, hemoglobin concentration and hematocrit were observed in females receiving 300 mg candesartan cilexetil/kg/day and in both sexes receiving 1000 and 3000 mg candesartan cilexetil/kg/day (Table 76).	Higher than control incidences of hypertrophy of the juxtaglomerular (JG) cells and intimal proliferation of the interlobular artery in the kidney were observed in candesartan cilexetil- treated groups (Table 79). The severity of JG cell hypertrophy seen with 300 mg candesartan cilexetil/kg/day in males (mild hypertrophy in 7/10 and moderate hypertrophy in 3/30) increased with higher doses (mild …			Lower than control heart weight and higher than control relative kidney weights were noted in each treated group for both sexes (Table 78).	Urine values (pH, protein, ketones, urobilinogen and incidence of occult blood, erythrocytes, leukocytes and epithelial cells) in treated animals were comparable to those of control.				Results_x000D_ Mortality and Clinical Signs: No animals died during the study. No treatment-related clinical signs of toxicity were observed. _x000D_ Body Weight: Significantly lower than control body weights were observed for males treated with 1000 and 3000 mg candesartan cilexetil/kg/day from week 2 to week 13 of dosing (Fig. 12, Table 73). Slightly lower than control body weights were observe…			Results_x000D_ Mortality and Clinical Signs: No animals died during the study. No treatment-related clinical signs of toxicity were observed. _x000D_ Body Weight: Significantly lower than control body weights were observed for males treated with 1000 and 3000 mg candesartan cilexetil/kg/day from week 2 to week 13 of dosing (Fig. 12, Table 73). Slightly lower than control body weights were observe…	1d95b514-4314-4740-b982-2f153795643d	FALSE	{'code': '61012', 'code (mapped)': 'body weight and weight gain'}	345
229d77fb-d4cd-4ae7-8216-60b0ebbf43f5_dossier.i6z	NDA020838-candesartan cilexetil	145040-37-5	1-cyclohexyloxycarbonyloxyethyl 2-ethoxy-3-[[4-[2-(2H-tetrazol-5-yl)phenyl]phenyl]methyl]benzimidazole-4-carboxylate	v2	NDA020838	CARDIOVASCULAR SYSTEM	a5a28d5d-8005-401b-9e14-65a818f42c51	229d77fb-d4cd-4ae7-8216-60b0ebbf43f5	46161435	35ae3f90-b204-412a-9b06-1e0993d97cb0	Carcinogenicity	61277	carcinogenicity: oral	1895	experimental study				{"AdministrativeData": {"Endpoint": {"code": "61277"}, "StudyResultType": {"code": "1895"}, "RobustStudy": false, "UsedForClassification": false, "UsedForMSDS": false}, "MaterialsAndMethods": {"TestMaterials": {"TestMaterialInformation": "0260d68a-deaa-4ec5-ac20-3470b5c643a3/a5a28d5d-8005-401b-9e14-65a818f42c51", "SpecificDetailsOnTestMaterialUsedForTheStudy": "Lot #M464-010"}, "TestAnimals": {"S…	rat	other:F344/Jcl	oral: feed	13 weeks	not specified	1000.0 mg/kg bw/day (actual dose received), 300.0 mg/kg bw/day (actual dose received), None mg/kg bw/day (actual dose received), 3000.0 mg/kg bw/day (actual dose received)	Significantly lower than control body weights were observed for males treated with 1000 and 3000 mg candesartan cilexetil/kg/day from week 2 to week 13 of dosing (Fig. 12, Table 73). Slightly lower than control body weights were observed for females in the 3000 mg/kg dose group; however, the latter difference was not statistically significant. The gains from initial body weights to those at week …	Plasma urea nitrogen was increased in each treated group except for females in the 300 mg/kg/day group. Plasma LDH, AST and ALT values in females given 1000 and 3000 mg candesartan cilexetil/kg/day were higher than control (Table 77). In males, higher than control levels of inorganic phosphorus were noted in all candesartan cilexetil- treated groups, and higher than control levels of cholesterol …			A statistically significant reduction from control food consumption was observed for males in each treated group from week 1 through week 6; thereafter, statistically significant reductions were noted sporadically in the 1000 mg/kg group. No treatment- related effects on food consumption were noted for female rats (Table 74)._x000D_ _x000D_ _x000D_ _x000D_ Drug intake during week 1 was below the …			Lower than control values in erythrocyte counts, hemoglobin concentration and hematocrit were observed in females receiving 300 mg candesartan cilexetil/kg/day and in both sexes receiving 1000 and 3000 mg candesartan cilexetil/kg/day (Table 76).	Higher than control incidences of hypertrophy of the juxtaglomerular (JG) cells and intimal proliferation of the interlobular artery in the kidney were observed in candesartan cilexetil- treated groups (Table 79). The severity of JG cell hypertrophy seen with 300 mg candesartan cilexetil/kg/day in males (mild hypertrophy in 7/10 and moderate hypertrophy in 3/30) increased with higher doses (mild …			Lower than control heart weight and higher than control relative kidney weights were noted in each treated group for both sexes (Table 78).	Urine values (pH, protein, ketones, urobilinogen and incidence of occult blood, erythrocytes, leukocytes and epithelial cells) in treated animals were comparable to those of control.				Results_x000D_ Mortality and Clinical Signs: No animals died during the study. No treatment-related clinical signs of toxicity were observed. _x000D_ Body Weight: Significantly lower than control body weights were observed for males treated with 1000 and 3000 mg candesartan cilexetil/kg/day from week 2 to week 13 of dosing (Fig. 12, Table 73). Slightly lower than control body weights were observe…			Results_x000D_ Mortality and Clinical Signs: No animals died during the study. No treatment-related clinical signs of toxicity were observed. _x000D_ Body Weight: Significantly lower than control body weights were observed for males treated with 1000 and 3000 mg candesartan cilexetil/kg/day from week 2 to week 13 of dosing (Fig. 12, Table 73). Slightly lower than control body weights were observe…	25afca6a-79fd-4aca-9708-36dbc967593e	FALSE		1109
229d77fb-d4cd-4ae7-8216-60b0ebbf43f5_dossier.i6z	NDA020838-candesartan cilexetil	145040-37-5	1-cyclohexyloxycarbonyloxyethyl 2-ethoxy-3-[[4-[2-(2H-tetrazol-5-yl)phenyl]phenyl]methyl]benzimidazole-4-carboxylate	v2	NDA020838	CARDIOVASCULAR SYSTEM	a5a28d5d-8005-401b-9e14-65a818f42c51	229d77fb-d4cd-4ae7-8216-60b0ebbf43f5	46161435	35ae3f90-b204-412a-9b06-1e0993d97cb0	Carcinogenicity	61277	carcinogenicity: oral	1895	experimental study				{"AdministrativeData": {"Endpoint": {"code": "61277"}, "StudyResultType": {"code": "1895"}, "RobustStudy": false, "UsedForClassification": false, "UsedForMSDS": false}, "MaterialsAndMethods": {"TestMaterials": {"TestMaterialInformation": "0260d68a-deaa-4ec5-ac20-3470b5c643a3/a5a28d5d-8005-401b-9e14-65a818f42c51", "SpecificDetailsOnTestMaterialUsedForTheStudy": "Lot #M464-010"}, "TestAnimals": {"S…	rat	other:F344/Jcl	oral: feed	13 weeks	not specified	1000.0 mg/kg bw/day (actual dose received), 300.0 mg/kg bw/day (actual dose received), None mg/kg bw/day (actual dose received), 3000.0 mg/kg bw/day (actual dose received)	Significantly lower than control body weights were observed for males treated with 1000 and 3000 mg candesartan cilexetil/kg/day from week 2 to week 13 of dosing (Fig. 12, Table 73). Slightly lower than control body weights were observed for females in the 3000 mg/kg dose group; however, the latter difference was not statistically significant. The gains from initial body weights to those at week …	Plasma urea nitrogen was increased in each treated group except for females in the 300 mg/kg/day group. Plasma LDH, AST and ALT values in females given 1000 and 3000 mg candesartan cilexetil/kg/day were higher than control (Table 77). In males, higher than control levels of inorganic phosphorus were noted in all candesartan cilexetil- treated groups, and higher than control levels of cholesterol …			A statistically significant reduction from control food consumption was observed for males in each treated group from week 1 through week 6; thereafter, statistically significant reductions were noted sporadically in the 1000 mg/kg group. No treatment- related effects on food consumption were noted for female rats (Table 74)._x000D_ _x000D_ _x000D_ _x000D_ Drug intake during week 1 was below the …			Lower than control values in erythrocyte counts, hemoglobin concentration and hematocrit were observed in females receiving 300 mg candesartan cilexetil/kg/day and in both sexes receiving 1000 and 3000 mg candesartan cilexetil/kg/day (Table 76).	Higher than control incidences of hypertrophy of the juxtaglomerular (JG) cells and intimal proliferation of the interlobular artery in the kidney were observed in candesartan cilexetil- treated groups (Table 79). The severity of JG cell hypertrophy seen with 300 mg candesartan cilexetil/kg/day in males (mild hypertrophy in 7/10 and moderate hypertrophy in 3/30) increased with higher doses (mild …			Lower than control heart weight and higher than control relative kidney weights were noted in each treated group for both sexes (Table 78).	Urine values (pH, protein, ketones, urobilinogen and incidence of occult blood, erythrocytes, leukocytes and epithelial cells) in treated animals were comparable to those of control.				Results_x000D_ Mortality and Clinical Signs: No animals died during the study. No treatment-related clinical signs of toxicity were observed. _x000D_ Body Weight: Significantly lower than control body weights were observed for males treated with 1000 and 3000 mg candesartan cilexetil/kg/day from week 2 to week 13 of dosing (Fig. 12, Table 73). Slightly lower than control body weights were observe…			Results_x000D_ Mortality and Clinical Signs: No animals died during the study. No treatment-related clinical signs of toxicity were observed. _x000D_ Body Weight: Significantly lower than control body weights were observed for males treated with 1000 and 3000 mg candesartan cilexetil/kg/day from week 2 to week 13 of dosing (Fig. 12, Table 73). Slightly lower than control body weights were observe…	2e81f53d-53c9-4d28-bfea-67b504c7e058	FALSE	{'code': '61018', 'code (mapped)': 'clinical biochemistry'}	345
229d77fb-d4cd-4ae7-8216-60b0ebbf43f5_dossier.i6z	NDA020838-candesartan cilexetil	145040-37-5	1-cyclohexyloxycarbonyloxyethyl 2-ethoxy-3-[[4-[2-(2H-tetrazol-5-yl)phenyl]phenyl]methyl]benzimidazole-4-carboxylate	v2	NDA020838	CARDIOVASCULAR SYSTEM	a5a28d5d-8005-401b-9e14-65a818f42c51	229d77fb-d4cd-4ae7-8216-60b0ebbf43f5	46161435	35ae3f90-b204-412a-9b06-1e0993d97cb0	Carcinogenicity	61277	carcinogenicity: oral	1895	experimental study				{"AdministrativeData": {"Endpoint": {"code": "61277"}, "StudyResultType": {"code": "1895"}, "RobustStudy": false, "UsedForClassification": false, "UsedForMSDS": false}, "MaterialsAndMethods": {"TestMaterials": {"TestMaterialInformation": "0260d68a-deaa-4ec5-ac20-3470b5c643a3/a5a28d5d-8005-401b-9e14-65a818f42c51", "SpecificDetailsOnTestMaterialUsedForTheStudy": "Lot #M464-010"}, "TestAnimals": {"S…	rat	other:F344/Jcl	oral: feed	13 weeks	not specified	1000.0 mg/kg bw/day (actual dose received), 300.0 mg/kg bw/day (actual dose received), None mg/kg bw/day (actual dose received), 3000.0 mg/kg bw/day (actual dose received)	Significantly lower than control body weights were observed for males treated with 1000 and 3000 mg candesartan cilexetil/kg/day from week 2 to week 13 of dosing (Fig. 12, Table 73). Slightly lower than control body weights were observed for females in the 3000 mg/kg dose group; however, the latter difference was not statistically significant. The gains from initial body weights to those at week …	Plasma urea nitrogen was increased in each treated group except for females in the 300 mg/kg/day group. Plasma LDH, AST and ALT values in females given 1000 and 3000 mg candesartan cilexetil/kg/day were higher than control (Table 77). In males, higher than control levels of inorganic phosphorus were noted in all candesartan cilexetil- treated groups, and higher than control levels of cholesterol …			A statistically significant reduction from control food consumption was observed for males in each treated group from week 1 through week 6; thereafter, statistically significant reductions were noted sporadically in the 1000 mg/kg group. No treatment- related effects on food consumption were noted for female rats (Table 74)._x000D_ _x000D_ _x000D_ _x000D_ Drug intake during week 1 was below the …			Lower than control values in erythrocyte counts, hemoglobin concentration and hematocrit were observed in females receiving 300 mg candesartan cilexetil/kg/day and in both sexes receiving 1000 and 3000 mg candesartan cilexetil/kg/day (Table 76).	Higher than control incidences of hypertrophy of the juxtaglomerular (JG) cells and intimal proliferation of the interlobular artery in the kidney were observed in candesartan cilexetil- treated groups (Table 79). The severity of JG cell hypertrophy seen with 300 mg candesartan cilexetil/kg/day in males (mild hypertrophy in 7/10 and moderate hypertrophy in 3/30) increased with higher doses (mild …			Lower than control heart weight and higher than control relative kidney weights were noted in each treated group for both sexes (Table 78).	Urine values (pH, protein, ketones, urobilinogen and incidence of occult blood, erythrocytes, leukocytes and epithelial cells) in treated animals were comparable to those of control.				Results_x000D_ Mortality and Clinical Signs: No animals died during the study. No treatment-related clinical signs of toxicity were observed. _x000D_ Body Weight: Significantly lower than control body weights were observed for males treated with 1000 and 3000 mg candesartan cilexetil/kg/day from week 2 to week 13 of dosing (Fig. 12, Table 73). Slightly lower than control body weights were observe…			Results_x000D_ Mortality and Clinical Signs: No animals died during the study. No treatment-related clinical signs of toxicity were observed. _x000D_ Body Weight: Significantly lower than control body weights were observed for males treated with 1000 and 3000 mg candesartan cilexetil/kg/day from week 2 to week 13 of dosing (Fig. 12, Table 73). Slightly lower than control body weights were observe…	2e81f53d-53c9-4d28-bfea-67b504c7e058	FALSE	{'code': '61018', 'code (mapped)': 'clinical biochemistry'}	345
229d77fb-d4cd-4ae7-8216-60b0ebbf43f5_dossier.i6z	NDA020838-candesartan cilexetil	145040-37-5	1-cyclohexyloxycarbonyloxyethyl 2-ethoxy-3-[[4-[2-(2H-tetrazol-5-yl)phenyl]phenyl]methyl]benzimidazole-4-carboxylate	v2	NDA020838	CARDIOVASCULAR SYSTEM	a5a28d5d-8005-401b-9e14-65a818f42c51	229d77fb-d4cd-4ae7-8216-60b0ebbf43f5	46161435	35ae3f90-b204-412a-9b06-1e0993d97cb0	Carcinogenicity	61277	carcinogenicity: oral	1895	experimental study				{"AdministrativeData": {"Endpoint": {"code": "61277"}, "StudyResultType": {"code": "1895"}, "RobustStudy": false, "UsedForClassification": false, "UsedForMSDS": false}, "MaterialsAndMethods": {"TestMaterials": {"TestMaterialInformation": "0260d68a-deaa-4ec5-ac20-3470b5c643a3/a5a28d5d-8005-401b-9e14-65a818f42c51", "SpecificDetailsOnTestMaterialUsedForTheStudy": "Lot #M464-010"}, "TestAnimals": {"S…	rat	other:F344/Jcl	oral: feed	13 weeks	not specified	1000.0 mg/kg bw/day (actual dose received), 300.0 mg/kg bw/day (actual dose received), None mg/kg bw/day (actual dose received), 3000.0 mg/kg bw/day (actual dose received)	Significantly lower than control body weights were observed for males treated with 1000 and 3000 mg candesartan cilexetil/kg/day from week 2 to week 13 of dosing (Fig. 12, Table 73). Slightly lower than control body weights were observed for females in the 3000 mg/kg dose group; however, the latter difference was not statistically significant. The gains from initial body weights to those at week …	Plasma urea nitrogen was increased in each treated group except for females in the 300 mg/kg/day group. Plasma LDH, AST and ALT values in females given 1000 and 3000 mg candesartan cilexetil/kg/day were higher than control (Table 77). In males, higher than control levels of inorganic phosphorus were noted in all candesartan cilexetil- treated groups, and higher than control levels of cholesterol …			A statistically significant reduction from control food consumption was observed for males in each treated group from week 1 through week 6; thereafter, statistically significant reductions were noted sporadically in the 1000 mg/kg group. No treatment- related effects on food consumption were noted for female rats (Table 74)._x000D_ _x000D_ _x000D_ _x000D_ Drug intake during week 1 was below the …			Lower than control values in erythrocyte counts, hemoglobin concentration and hematocrit were observed in females receiving 300 mg candesartan cilexetil/kg/day and in both sexes receiving 1000 and 3000 mg candesartan cilexetil/kg/day (Table 76).	Higher than control incidences of hypertrophy of the juxtaglomerular (JG) cells and intimal proliferation of the interlobular artery in the kidney were observed in candesartan cilexetil- treated groups (Table 79). The severity of JG cell hypertrophy seen with 300 mg candesartan cilexetil/kg/day in males (mild hypertrophy in 7/10 and moderate hypertrophy in 3/30) increased with higher doses (mild …			Lower than control heart weight and higher than control relative kidney weights were noted in each treated group for both sexes (Table 78).	Urine values (pH, protein, ketones, urobilinogen and incidence of occult blood, erythrocytes, leukocytes and epithelial cells) in treated animals were comparable to those of control.				Results_x000D_ Mortality and Clinical Signs: No animals died during the study. No treatment-related clinical signs of toxicity were observed. _x000D_ Body Weight: Significantly lower than control body weights were observed for males treated with 1000 and 3000 mg candesartan cilexetil/kg/day from week 2 to week 13 of dosing (Fig. 12, Table 73). Slightly lower than control body weights were observe…			Results_x000D_ Mortality and Clinical Signs: No animals died during the study. No treatment-related clinical signs of toxicity were observed. _x000D_ Body Weight: Significantly lower than control body weights were observed for males treated with 1000 and 3000 mg candesartan cilexetil/kg/day from week 2 to week 13 of dosing (Fig. 12, Table 73). Slightly lower than control body weights were observe…	3eb4a9ec-0a3b-4a8a-887b-c81325d3d8d2	FALSE	{'code': '61023', 'code (mapped)': 'gross pathology'}	1130
229d77fb-d4cd-4ae7-8216-60b0ebbf43f5_dossier.i6z	NDA020838-candesartan cilexetil	145040-37-5	1-cyclohexyloxycarbonyloxyethyl 2-ethoxy-3-[[4-[2-(2H-tetrazol-5-yl)phenyl]phenyl]methyl]benzimidazole-4-carboxylate	v2	NDA020838	CARDIOVASCULAR SYSTEM	a5a28d5d-8005-401b-9e14-65a818f42c51	229d77fb-d4cd-4ae7-8216-60b0ebbf43f5	46161435	35ae3f90-b204-412a-9b06-1e0993d97cb0	Carcinogenicity	61277	carcinogenicity: oral	1895	experimental study				{"AdministrativeData": {"Endpoint": {"code": "61277"}, "StudyResultType": {"code": "1895"}, "RobustStudy": false, "UsedForClassification": false, "UsedForMSDS": false}, "MaterialsAndMethods": {"TestMaterials": {"TestMaterialInformation": "0260d68a-deaa-4ec5-ac20-3470b5c643a3/a5a28d5d-8005-401b-9e14-65a818f42c51", "SpecificDetailsOnTestMaterialUsedForTheStudy": "Lot #M464-010"}, "TestAnimals": {"S…	rat	other:F344/Jcl	oral: feed	13 weeks	not specified	1000.0 mg/kg bw/day (actual dose received), 300.0 mg/kg bw/day (actual dose received), None mg/kg bw/day (actual dose received), 3000.0 mg/kg bw/day (actual dose received)	Significantly lower than control body weights were observed for males treated with 1000 and 3000 mg candesartan cilexetil/kg/day from week 2 to week 13 of dosing (Fig. 12, Table 73). Slightly lower than control body weights were observed for females in the 3000 mg/kg dose group; however, the latter difference was not statistically significant. The gains from initial body weights to those at week …	Plasma urea nitrogen was increased in each treated group except for females in the 300 mg/kg/day group. Plasma LDH, AST and ALT values in females given 1000 and 3000 mg candesartan cilexetil/kg/day were higher than control (Table 77). In males, higher than control levels of inorganic phosphorus were noted in all candesartan cilexetil- treated groups, and higher than control levels of cholesterol …			A statistically significant reduction from control food consumption was observed for males in each treated group from week 1 through week 6; thereafter, statistically significant reductions were noted sporadically in the 1000 mg/kg group. No treatment- related effects on food consumption were noted for female rats (Table 74)._x000D_ _x000D_ _x000D_ _x000D_ Drug intake during week 1 was below the …			Lower than control values in erythrocyte counts, hemoglobin concentration and hematocrit were observed in females receiving 300 mg candesartan cilexetil/kg/day and in both sexes receiving 1000 and 3000 mg candesartan cilexetil/kg/day (Table 76).	Higher than control incidences of hypertrophy of the juxtaglomerular (JG) cells and intimal proliferation of the interlobular artery in the kidney were observed in candesartan cilexetil- treated groups (Table 79). The severity of JG cell hypertrophy seen with 300 mg candesartan cilexetil/kg/day in males (mild hypertrophy in 7/10 and moderate hypertrophy in 3/30) increased with higher doses (mild …			Lower than control heart weight and higher than control relative kidney weights were noted in each treated group for both sexes (Table 78).	Urine values (pH, protein, ketones, urobilinogen and incidence of occult blood, erythrocytes, leukocytes and epithelial cells) in treated animals were comparable to those of control.				Results_x000D_ Mortality and Clinical Signs: No animals died during the study. No treatment-related clinical signs of toxicity were observed. _x000D_ Body Weight: Significantly lower than control body weights were observed for males treated with 1000 and 3000 mg candesartan cilexetil/kg/day from week 2 to week 13 of dosing (Fig. 12, Table 73). Slightly lower than control body weights were observe…			Results_x000D_ Mortality and Clinical Signs: No animals died during the study. No treatment-related clinical signs of toxicity were observed. _x000D_ Body Weight: Significantly lower than control body weights were observed for males treated with 1000 and 3000 mg candesartan cilexetil/kg/day from week 2 to week 13 of dosing (Fig. 12, Table 73). Slightly lower than control body weights were observe…	4501bc4c-708f-44f9-84ae-41fe5c613369	FALSE	{'code': '61018', 'code (mapped)': 'clinical biochemistry'}	345
229d77fb-d4cd-4ae7-8216-60b0ebbf43f5_dossier.i6z	NDA020838-candesartan cilexetil	145040-37-5	1-cyclohexyloxycarbonyloxyethyl 2-ethoxy-3-[[4-[2-(2H-tetrazol-5-yl)phenyl]phenyl]methyl]benzimidazole-4-carboxylate	v2	NDA020838	CARDIOVASCULAR SYSTEM	a5a28d5d-8005-401b-9e14-65a818f42c51	229d77fb-d4cd-4ae7-8216-60b0ebbf43f5	46161435	35ae3f90-b204-412a-9b06-1e0993d97cb0	Carcinogenicity	61277	carcinogenicity: oral	1895	experimental study				{"AdministrativeData": {"Endpoint": {"code": "61277"}, "StudyResultType": {"code": "1895"}, "RobustStudy": false, "UsedForClassification": false, "UsedForMSDS": false}, "MaterialsAndMethods": {"TestMaterials": {"TestMaterialInformation": "0260d68a-deaa-4ec5-ac20-3470b5c643a3/a5a28d5d-8005-401b-9e14-65a818f42c51", "SpecificDetailsOnTestMaterialUsedForTheStudy": "Lot #M464-010"}, "TestAnimals": {"S…	rat	other:F344/Jcl	oral: feed	13 weeks	not specified	1000.0 mg/kg bw/day (actual dose received), 300.0 mg/kg bw/day (actual dose received), None mg/kg bw/day (actual dose received), 3000.0 mg/kg bw/day (actual dose received)	Significantly lower than control body weights were observed for males treated with 1000 and 3000 mg candesartan cilexetil/kg/day from week 2 to week 13 of dosing (Fig. 12, Table 73). Slightly lower than control body weights were observed for females in the 3000 mg/kg dose group; however, the latter difference was not statistically significant. The gains from initial body weights to those at week …	Plasma urea nitrogen was increased in each treated group except for females in the 300 mg/kg/day group. Plasma LDH, AST and ALT values in females given 1000 and 3000 mg candesartan cilexetil/kg/day were higher than control (Table 77). In males, higher than control levels of inorganic phosphorus were noted in all candesartan cilexetil- treated groups, and higher than control levels of cholesterol …			A statistically significant reduction from control food consumption was observed for males in each treated group from week 1 through week 6; thereafter, statistically significant reductions were noted sporadically in the 1000 mg/kg group. No treatment- related effects on food consumption were noted for female rats (Table 74)._x000D_ _x000D_ _x000D_ _x000D_ Drug intake during week 1 was below the …			Lower than control values in erythrocyte counts, hemoglobin concentration and hematocrit were observed in females receiving 300 mg candesartan cilexetil/kg/day and in both sexes receiving 1000 and 3000 mg candesartan cilexetil/kg/day (Table 76).	Higher than control incidences of hypertrophy of the juxtaglomerular (JG) cells and intimal proliferation of the interlobular artery in the kidney were observed in candesartan cilexetil- treated groups (Table 79). The severity of JG cell hypertrophy seen with 300 mg candesartan cilexetil/kg/day in males (mild hypertrophy in 7/10 and moderate hypertrophy in 3/30) increased with higher doses (mild …			Lower than control heart weight and higher than control relative kidney weights were noted in each treated group for both sexes (Table 78).	Urine values (pH, protein, ketones, urobilinogen and incidence of occult blood, erythrocytes, leukocytes and epithelial cells) in treated animals were comparable to those of control.				Results_x000D_ Mortality and Clinical Signs: No animals died during the study. No treatment-related clinical signs of toxicity were observed. _x000D_ Body Weight: Significantly lower than control body weights were observed for males treated with 1000 and 3000 mg candesartan cilexetil/kg/day from week 2 to week 13 of dosing (Fig. 12, Table 73). Slightly lower than control body weights were observe…			Results_x000D_ Mortality and Clinical Signs: No animals died during the study. No treatment-related clinical signs of toxicity were observed. _x000D_ Body Weight: Significantly lower than control body weights were observed for males treated with 1000 and 3000 mg candesartan cilexetil/kg/day from week 2 to week 13 of dosing (Fig. 12, Table 73). Slightly lower than control body weights were observe…	4501bc4c-708f-44f9-84ae-41fe5c613369	FALSE	{'code': '61018', 'code (mapped)': 'clinical biochemistry'}	345
229d77fb-d4cd-4ae7-8216-60b0ebbf43f5_dossier.i6z	NDA020838-candesartan cilexetil	145040-37-5	1-cyclohexyloxycarbonyloxyethyl 2-ethoxy-3-[[4-[2-(2H-tetrazol-5-yl)phenyl]phenyl]methyl]benzimidazole-4-carboxylate	v2	NDA020838	CARDIOVASCULAR SYSTEM	a5a28d5d-8005-401b-9e14-65a818f42c51	229d77fb-d4cd-4ae7-8216-60b0ebbf43f5	46161435	35ae3f90-b204-412a-9b06-1e0993d97cb0	Carcinogenicity	61277	carcinogenicity: oral	1895	experimental study				{"AdministrativeData": {"Endpoint": {"code": "61277"}, "StudyResultType": {"code": "1895"}, "RobustStudy": false, "UsedForClassification": false, "UsedForMSDS": false}, "MaterialsAndMethods": {"TestMaterials": {"TestMaterialInformation": "0260d68a-deaa-4ec5-ac20-3470b5c643a3/a5a28d5d-8005-401b-9e14-65a818f42c51", "SpecificDetailsOnTestMaterialUsedForTheStudy": "Lot #M464-010"}, "TestAnimals": {"S…	rat	other:F344/Jcl	oral: feed	13 weeks	not specified	1000.0 mg/kg bw/day (actual dose received), 300.0 mg/kg bw/day (actual dose received), None mg/kg bw/day (actual dose received), 3000.0 mg/kg bw/day (actual dose received)	Significantly lower than control body weights were observed for males treated with 1000 and 3000 mg candesartan cilexetil/kg/day from week 2 to week 13 of dosing (Fig. 12, Table 73). Slightly lower than control body weights were observed for females in the 3000 mg/kg dose group; however, the latter difference was not statistically significant. The gains from initial body weights to those at week …	Plasma urea nitrogen was increased in each treated group except for females in the 300 mg/kg/day group. Plasma LDH, AST and ALT values in females given 1000 and 3000 mg candesartan cilexetil/kg/day were higher than control (Table 77). In males, higher than control levels of inorganic phosphorus were noted in all candesartan cilexetil- treated groups, and higher than control levels of cholesterol …			A statistically significant reduction from control food consumption was observed for males in each treated group from week 1 through week 6; thereafter, statistically significant reductions were noted sporadically in the 1000 mg/kg group. No treatment- related effects on food consumption were noted for female rats (Table 74)._x000D_ _x000D_ _x000D_ _x000D_ Drug intake during week 1 was below the …			Lower than control values in erythrocyte counts, hemoglobin concentration and hematocrit were observed in females receiving 300 mg candesartan cilexetil/kg/day and in both sexes receiving 1000 and 3000 mg candesartan cilexetil/kg/day (Table 76).	Higher than control incidences of hypertrophy of the juxtaglomerular (JG) cells and intimal proliferation of the interlobular artery in the kidney were observed in candesartan cilexetil- treated groups (Table 79). The severity of JG cell hypertrophy seen with 300 mg candesartan cilexetil/kg/day in males (mild hypertrophy in 7/10 and moderate hypertrophy in 3/30) increased with higher doses (mild …			Lower than control heart weight and higher than control relative kidney weights were noted in each treated group for both sexes (Table 78).	Urine values (pH, protein, ketones, urobilinogen and incidence of occult blood, erythrocytes, leukocytes and epithelial cells) in treated animals were comparable to those of control.				Results_x000D_ Mortality and Clinical Signs: No animals died during the study. No treatment-related clinical signs of toxicity were observed. _x000D_ Body Weight: Significantly lower than control body weights were observed for males treated with 1000 and 3000 mg candesartan cilexetil/kg/day from week 2 to week 13 of dosing (Fig. 12, Table 73). Slightly lower than control body weights were observe…			Results_x000D_ Mortality and Clinical Signs: No animals died during the study. No treatment-related clinical signs of toxicity were observed. _x000D_ Body Weight: Significantly lower than control body weights were observed for males treated with 1000 and 3000 mg candesartan cilexetil/kg/day from week 2 to week 13 of dosing (Fig. 12, Table 73). Slightly lower than control body weights were observe…	7d4dfe4f-4e5a-4263-a092-a74bcbace705	FALSE	{'code': '61012', 'code (mapped)': 'body weight and weight gain'}	345
229d77fb-d4cd-4ae7-8216-60b0ebbf43f5_dossier.i6z	NDA020838-candesartan cilexetil	145040-37-5	1-cyclohexyloxycarbonyloxyethyl 2-ethoxy-3-[[4-[2-(2H-tetrazol-5-yl)phenyl]phenyl]methyl]benzimidazole-4-carboxylate	v2	NDA020838	CARDIOVASCULAR SYSTEM	a5a28d5d-8005-401b-9e14-65a818f42c51	229d77fb-d4cd-4ae7-8216-60b0ebbf43f5	46161435	35ae3f90-b204-412a-9b06-1e0993d97cb0	Carcinogenicity	61277	carcinogenicity: oral	1895	experimental study				{"AdministrativeData": {"Endpoint": {"code": "61277"}, "StudyResultType": {"code": "1895"}, "RobustStudy": false, "UsedForClassification": false, "UsedForMSDS": false}, "MaterialsAndMethods": {"TestMaterials": {"TestMaterialInformation": "0260d68a-deaa-4ec5-ac20-3470b5c643a3/a5a28d5d-8005-401b-9e14-65a818f42c51", "SpecificDetailsOnTestMaterialUsedForTheStudy": "Lot #M464-010"}, "TestAnimals": {"S…	rat	other:F344/Jcl	oral: feed	13 weeks	not specified	1000.0 mg/kg bw/day (actual dose received), 300.0 mg/kg bw/day (actual dose received), None mg/kg bw/day (actual dose received), 3000.0 mg/kg bw/day (actual dose received)	Significantly lower than control body weights were observed for males treated with 1000 and 3000 mg candesartan cilexetil/kg/day from week 2 to week 13 of dosing (Fig. 12, Table 73). Slightly lower than control body weights were observed for females in the 3000 mg/kg dose group; however, the latter difference was not statistically significant. The gains from initial body weights to those at week …	Plasma urea nitrogen was increased in each treated group except for females in the 300 mg/kg/day group. Plasma LDH, AST and ALT values in females given 1000 and 3000 mg candesartan cilexetil/kg/day were higher than control (Table 77). In males, higher than control levels of inorganic phosphorus were noted in all candesartan cilexetil- treated groups, and higher than control levels of cholesterol …			A statistically significant reduction from control food consumption was observed for males in each treated group from week 1 through week 6; thereafter, statistically significant reductions were noted sporadically in the 1000 mg/kg group. No treatment- related effects on food consumption were noted for female rats (Table 74)._x000D_ _x000D_ _x000D_ _x000D_ Drug intake during week 1 was below the …			Lower than control values in erythrocyte counts, hemoglobin concentration and hematocrit were observed in females receiving 300 mg candesartan cilexetil/kg/day and in both sexes receiving 1000 and 3000 mg candesartan cilexetil/kg/day (Table 76).	Higher than control incidences of hypertrophy of the juxtaglomerular (JG) cells and intimal proliferation of the interlobular artery in the kidney were observed in candesartan cilexetil- treated groups (Table 79). The severity of JG cell hypertrophy seen with 300 mg candesartan cilexetil/kg/day in males (mild hypertrophy in 7/10 and moderate hypertrophy in 3/30) increased with higher doses (mild …			Lower than control heart weight and higher than control relative kidney weights were noted in each treated group for both sexes (Table 78).	Urine values (pH, protein, ketones, urobilinogen and incidence of occult blood, erythrocytes, leukocytes and epithelial cells) in treated animals were comparable to those of control.				Results_x000D_ Mortality and Clinical Signs: No animals died during the study. No treatment-related clinical signs of toxicity were observed. _x000D_ Body Weight: Significantly lower than control body weights were observed for males treated with 1000 and 3000 mg candesartan cilexetil/kg/day from week 2 to week 13 of dosing (Fig. 12, Table 73). Slightly lower than control body weights were observe…			Results_x000D_ Mortality and Clinical Signs: No animals died during the study. No treatment-related clinical signs of toxicity were observed. _x000D_ Body Weight: Significantly lower than control body weights were observed for males treated with 1000 and 3000 mg candesartan cilexetil/kg/day from week 2 to week 13 of dosing (Fig. 12, Table 73). Slightly lower than control body weights were observe…	7d4dfe4f-4e5a-4263-a092-a74bcbace705	FALSE	{'code': '61012', 'code (mapped)': 'body weight and weight gain'}	345
229d77fb-d4cd-4ae7-8216-60b0ebbf43f5_dossier.i6z	NDA020838-candesartan cilexetil	145040-37-5	1-cyclohexyloxycarbonyloxyethyl 2-ethoxy-3-[[4-[2-(2H-tetrazol-5-yl)phenyl]phenyl]methyl]benzimidazole-4-carboxylate	v2	NDA020838	CARDIOVASCULAR SYSTEM	a5a28d5d-8005-401b-9e14-65a818f42c51	229d77fb-d4cd-4ae7-8216-60b0ebbf43f5	46161435	35ae3f90-b204-412a-9b06-1e0993d97cb0	Carcinogenicity	61277	carcinogenicity: oral	1895	experimental study				{"AdministrativeData": {"Endpoint": {"code": "61277"}, "StudyResultType": {"code": "1895"}, "RobustStudy": false, "UsedForClassification": false, "UsedForMSDS": false}, "MaterialsAndMethods": {"TestMaterials": {"TestMaterialInformation": "0260d68a-deaa-4ec5-ac20-3470b5c643a3/a5a28d5d-8005-401b-9e14-65a818f42c51", "SpecificDetailsOnTestMaterialUsedForTheStudy": "Lot #M464-010"}, "TestAnimals": {"S…	rat	other:F344/Jcl	oral: feed	13 weeks	not specified	1000.0 mg/kg bw/day (actual dose received), 300.0 mg/kg bw/day (actual dose received), None mg/kg bw/day (actual dose received), 3000.0 mg/kg bw/day (actual dose received)	Significantly lower than control body weights were observed for males treated with 1000 and 3000 mg candesartan cilexetil/kg/day from week 2 to week 13 of dosing (Fig. 12, Table 73). Slightly lower than control body weights were observed for females in the 3000 mg/kg dose group; however, the latter difference was not statistically significant. The gains from initial body weights to those at week …	Plasma urea nitrogen was increased in each treated group except for females in the 300 mg/kg/day group. Plasma LDH, AST and ALT values in females given 1000 and 3000 mg candesartan cilexetil/kg/day were higher than control (Table 77). In males, higher than control levels of inorganic phosphorus were noted in all candesartan cilexetil- treated groups, and higher than control levels of cholesterol …			A statistically significant reduction from control food consumption was observed for males in each treated group from week 1 through week 6; thereafter, statistically significant reductions were noted sporadically in the 1000 mg/kg group. No treatment- related effects on food consumption were noted for female rats (Table 74)._x000D_ _x000D_ _x000D_ _x000D_ Drug intake during week 1 was below the …			Lower than control values in erythrocyte counts, hemoglobin concentration and hematocrit were observed in females receiving 300 mg candesartan cilexetil/kg/day and in both sexes receiving 1000 and 3000 mg candesartan cilexetil/kg/day (Table 76).	Higher than control incidences of hypertrophy of the juxtaglomerular (JG) cells and intimal proliferation of the interlobular artery in the kidney were observed in candesartan cilexetil- treated groups (Table 79). The severity of JG cell hypertrophy seen with 300 mg candesartan cilexetil/kg/day in males (mild hypertrophy in 7/10 and moderate hypertrophy in 3/30) increased with higher doses (mild …			Lower than control heart weight and higher than control relative kidney weights were noted in each treated group for both sexes (Table 78).	Urine values (pH, protein, ketones, urobilinogen and incidence of occult blood, erythrocytes, leukocytes and epithelial cells) in treated animals were comparable to those of control.				Results_x000D_ Mortality and Clinical Signs: No animals died during the study. No treatment-related clinical signs of toxicity were observed. _x000D_ Body Weight: Significantly lower than control body weights were observed for males treated with 1000 and 3000 mg candesartan cilexetil/kg/day from week 2 to week 13 of dosing (Fig. 12, Table 73). Slightly lower than control body weights were observe…			Results_x000D_ Mortality and Clinical Signs: No animals died during the study. No treatment-related clinical signs of toxicity were observed. _x000D_ Body Weight: Significantly lower than control body weights were observed for males treated with 1000 and 3000 mg candesartan cilexetil/kg/day from week 2 to week 13 of dosing (Fig. 12, Table 73). Slightly lower than control body weights were observe…	7d4dfe4f-4e5a-4263-a092-a74bcbace705	FALSE	{'code': '61012', 'code (mapped)': 'body weight and weight gain'}	345
229d77fb-d4cd-4ae7-8216-60b0ebbf43f5_dossier.i6z	NDA020838-candesartan cilexetil	145040-37-5	1-cyclohexyloxycarbonyloxyethyl 2-ethoxy-3-[[4-[2-(2H-tetrazol-5-yl)phenyl]phenyl]methyl]benzimidazole-4-carboxylate	v2	NDA020838	CARDIOVASCULAR SYSTEM	a5a28d5d-8005-401b-9e14-65a818f42c51	229d77fb-d4cd-4ae7-8216-60b0ebbf43f5	46161435	35ae3f90-b204-412a-9b06-1e0993d97cb0	Carcinogenicity	61277	carcinogenicity: oral	1895	experimental study				{"AdministrativeData": {"Endpoint": {"code": "61277"}, "StudyResultType": {"code": "1895"}, "RobustStudy": false, "UsedForClassification": false, "UsedForMSDS": false}, "MaterialsAndMethods": {"TestMaterials": {"TestMaterialInformation": "0260d68a-deaa-4ec5-ac20-3470b5c643a3/a5a28d5d-8005-401b-9e14-65a818f42c51", "SpecificDetailsOnTestMaterialUsedForTheStudy": "Lot #M464-010"}, "TestAnimals": {"S…	rat	other:F344/Jcl	oral: feed	13 weeks	not specified	1000.0 mg/kg bw/day (actual dose received), 300.0 mg/kg bw/day (actual dose received), None mg/kg bw/day (actual dose received), 3000.0 mg/kg bw/day (actual dose received)	Significantly lower than control body weights were observed for males treated with 1000 and 3000 mg candesartan cilexetil/kg/day from week 2 to week 13 of dosing (Fig. 12, Table 73). Slightly lower than control body weights were observed for females in the 3000 mg/kg dose group; however, the latter difference was not statistically significant. The gains from initial body weights to those at week …	Plasma urea nitrogen was increased in each treated group except for females in the 300 mg/kg/day group. Plasma LDH, AST and ALT values in females given 1000 and 3000 mg candesartan cilexetil/kg/day were higher than control (Table 77). In males, higher than control levels of inorganic phosphorus were noted in all candesartan cilexetil- treated groups, and higher than control levels of cholesterol …			A statistically significant reduction from control food consumption was observed for males in each treated group from week 1 through week 6; thereafter, statistically significant reductions were noted sporadically in the 1000 mg/kg group. No treatment- related effects on food consumption were noted for female rats (Table 74)._x000D_ _x000D_ _x000D_ _x000D_ Drug intake during week 1 was below the …			Lower than control values in erythrocyte counts, hemoglobin concentration and hematocrit were observed in females receiving 300 mg candesartan cilexetil/kg/day and in both sexes receiving 1000 and 3000 mg candesartan cilexetil/kg/day (Table 76).	Higher than control incidences of hypertrophy of the juxtaglomerular (JG) cells and intimal proliferation of the interlobular artery in the kidney were observed in candesartan cilexetil- treated groups (Table 79). The severity of JG cell hypertrophy seen with 300 mg candesartan cilexetil/kg/day in males (mild hypertrophy in 7/10 and moderate hypertrophy in 3/30) increased with higher doses (mild …			Lower than control heart weight and higher than control relative kidney weights were noted in each treated group for both sexes (Table 78).	Urine values (pH, protein, ketones, urobilinogen and incidence of occult blood, erythrocytes, leukocytes and epithelial cells) in treated animals were comparable to those of control.				Results_x000D_ Mortality and Clinical Signs: No animals died during the study. No treatment-related clinical signs of toxicity were observed. _x000D_ Body Weight: Significantly lower than control body weights were observed for males treated with 1000 and 3000 mg candesartan cilexetil/kg/day from week 2 to week 13 of dosing (Fig. 12, Table 73). Slightly lower than control body weights were observe…			Results_x000D_ Mortality and Clinical Signs: No animals died during the study. No treatment-related clinical signs of toxicity were observed. _x000D_ Body Weight: Significantly lower than control body weights were observed for males treated with 1000 and 3000 mg candesartan cilexetil/kg/day from week 2 to week 13 of dosing (Fig. 12, Table 73). Slightly lower than control body weights were observe…	8929ab14-554b-430f-9029-9dbe8d19b6bd	FALSE	{'code': '61018', 'code (mapped)': 'clinical biochemistry'}	345
229d77fb-d4cd-4ae7-8216-60b0ebbf43f5_dossier.i6z	NDA020838-candesartan cilexetil	145040-37-5	1-cyclohexyloxycarbonyloxyethyl 2-ethoxy-3-[[4-[2-(2H-tetrazol-5-yl)phenyl]phenyl]methyl]benzimidazole-4-carboxylate	v2	NDA020838	CARDIOVASCULAR SYSTEM	a5a28d5d-8005-401b-9e14-65a818f42c51	229d77fb-d4cd-4ae7-8216-60b0ebbf43f5	46161435	35ae3f90-b204-412a-9b06-1e0993d97cb0	Carcinogenicity	61277	carcinogenicity: oral	1895	experimental study				{"AdministrativeData": {"Endpoint": {"code": "61277"}, "StudyResultType": {"code": "1895"}, "RobustStudy": false, "UsedForClassification": false, "UsedForMSDS": false}, "MaterialsAndMethods": {"TestMaterials": {"TestMaterialInformation": "0260d68a-deaa-4ec5-ac20-3470b5c643a3/a5a28d5d-8005-401b-9e14-65a818f42c51", "SpecificDetailsOnTestMaterialUsedForTheStudy": "Lot #M464-010"}, "TestAnimals": {"S…	rat	other:F344/Jcl	oral: feed	13 weeks	not specified	1000.0 mg/kg bw/day (actual dose received), 300.0 mg/kg bw/day (actual dose received), None mg/kg bw/day (actual dose received), 3000.0 mg/kg bw/day (actual dose received)	Significantly lower than control body weights were observed for males treated with 1000 and 3000 mg candesartan cilexetil/kg/day from week 2 to week 13 of dosing (Fig. 12, Table 73). Slightly lower than control body weights were observed for females in the 3000 mg/kg dose group; however, the latter difference was not statistically significant. The gains from initial body weights to those at week …	Plasma urea nitrogen was increased in each treated group except for females in the 300 mg/kg/day group. Plasma LDH, AST and ALT values in females given 1000 and 3000 mg candesartan cilexetil/kg/day were higher than control (Table 77). In males, higher than control levels of inorganic phosphorus were noted in all candesartan cilexetil- treated groups, and higher than control levels of cholesterol …			A statistically significant reduction from control food consumption was observed for males in each treated group from week 1 through week 6; thereafter, statistically significant reductions were noted sporadically in the 1000 mg/kg group. No treatment- related effects on food consumption were noted for female rats (Table 74)._x000D_ _x000D_ _x000D_ _x000D_ Drug intake during week 1 was below the …			Lower than control values in erythrocyte counts, hemoglobin concentration and hematocrit were observed in females receiving 300 mg candesartan cilexetil/kg/day and in both sexes receiving 1000 and 3000 mg candesartan cilexetil/kg/day (Table 76).	Higher than control incidences of hypertrophy of the juxtaglomerular (JG) cells and intimal proliferation of the interlobular artery in the kidney were observed in candesartan cilexetil- treated groups (Table 79). The severity of JG cell hypertrophy seen with 300 mg candesartan cilexetil/kg/day in males (mild hypertrophy in 7/10 and moderate hypertrophy in 3/30) increased with higher doses (mild …			Lower than control heart weight and higher than control relative kidney weights were noted in each treated group for both sexes (Table 78).	Urine values (pH, protein, ketones, urobilinogen and incidence of occult blood, erythrocytes, leukocytes and epithelial cells) in treated animals were comparable to those of control.				Results_x000D_ Mortality and Clinical Signs: No animals died during the study. No treatment-related clinical signs of toxicity were observed. _x000D_ Body Weight: Significantly lower than control body weights were observed for males treated with 1000 and 3000 mg candesartan cilexetil/kg/day from week 2 to week 13 of dosing (Fig. 12, Table 73). Slightly lower than control body weights were observe…			Results_x000D_ Mortality and Clinical Signs: No animals died during the study. No treatment-related clinical signs of toxicity were observed. _x000D_ Body Weight: Significantly lower than control body weights were observed for males treated with 1000 and 3000 mg candesartan cilexetil/kg/day from week 2 to week 13 of dosing (Fig. 12, Table 73). Slightly lower than control body weights were observe…	8bebca51-0323-4fec-b0f4-d2f012cdfc9b	FALSE	{'code': '61013', 'code (mapped)': 'food consumption and compound intake'}	345
229d77fb-d4cd-4ae7-8216-60b0ebbf43f5_dossier.i6z	NDA020838-candesartan cilexetil	145040-37-5	1-cyclohexyloxycarbonyloxyethyl 2-ethoxy-3-[[4-[2-(2H-tetrazol-5-yl)phenyl]phenyl]methyl]benzimidazole-4-carboxylate	v2	NDA020838	CARDIOVASCULAR SYSTEM	a5a28d5d-8005-401b-9e14-65a818f42c51	229d77fb-d4cd-4ae7-8216-60b0ebbf43f5	46161435	35ae3f90-b204-412a-9b06-1e0993d97cb0	Carcinogenicity	61277	carcinogenicity: oral	1895	experimental study				{"AdministrativeData": {"Endpoint": {"code": "61277"}, "StudyResultType": {"code": "1895"}, "RobustStudy": false, "UsedForClassification": false, "UsedForMSDS": false}, "MaterialsAndMethods": {"TestMaterials": {"TestMaterialInformation": "0260d68a-deaa-4ec5-ac20-3470b5c643a3/a5a28d5d-8005-401b-9e14-65a818f42c51", "SpecificDetailsOnTestMaterialUsedForTheStudy": "Lot #M464-010"}, "TestAnimals": {"S…	rat	other:F344/Jcl	oral: feed	13 weeks	not specified	1000.0 mg/kg bw/day (actual dose received), 300.0 mg/kg bw/day (actual dose received), None mg/kg bw/day (actual dose received), 3000.0 mg/kg bw/day (actual dose received)	Significantly lower than control body weights were observed for males treated with 1000 and 3000 mg candesartan cilexetil/kg/day from week 2 to week 13 of dosing (Fig. 12, Table 73). Slightly lower than control body weights were observed for females in the 3000 mg/kg dose group; however, the latter difference was not statistically significant. The gains from initial body weights to those at week …	Plasma urea nitrogen was increased in each treated group except for females in the 300 mg/kg/day group. Plasma LDH, AST and ALT values in females given 1000 and 3000 mg candesartan cilexetil/kg/day were higher than control (Table 77). In males, higher than control levels of inorganic phosphorus were noted in all candesartan cilexetil- treated groups, and higher than control levels of cholesterol …			A statistically significant reduction from control food consumption was observed for males in each treated group from week 1 through week 6; thereafter, statistically significant reductions were noted sporadically in the 1000 mg/kg group. No treatment- related effects on food consumption were noted for female rats (Table 74)._x000D_ _x000D_ _x000D_ _x000D_ Drug intake during week 1 was below the …			Lower than control values in erythrocyte counts, hemoglobin concentration and hematocrit were observed in females receiving 300 mg candesartan cilexetil/kg/day and in both sexes receiving 1000 and 3000 mg candesartan cilexetil/kg/day (Table 76).	Higher than control incidences of hypertrophy of the juxtaglomerular (JG) cells and intimal proliferation of the interlobular artery in the kidney were observed in candesartan cilexetil- treated groups (Table 79). The severity of JG cell hypertrophy seen with 300 mg candesartan cilexetil/kg/day in males (mild hypertrophy in 7/10 and moderate hypertrophy in 3/30) increased with higher doses (mild …			Lower than control heart weight and higher than control relative kidney weights were noted in each treated group for both sexes (Table 78).	Urine values (pH, protein, ketones, urobilinogen and incidence of occult blood, erythrocytes, leukocytes and epithelial cells) in treated animals were comparable to those of control.				Results_x000D_ Mortality and Clinical Signs: No animals died during the study. No treatment-related clinical signs of toxicity were observed. _x000D_ Body Weight: Significantly lower than control body weights were observed for males treated with 1000 and 3000 mg candesartan cilexetil/kg/day from week 2 to week 13 of dosing (Fig. 12, Table 73). Slightly lower than control body weights were observe…			Results_x000D_ Mortality and Clinical Signs: No animals died during the study. No treatment-related clinical signs of toxicity were observed. _x000D_ Body Weight: Significantly lower than control body weights were observed for males treated with 1000 and 3000 mg candesartan cilexetil/kg/day from week 2 to week 13 of dosing (Fig. 12, Table 73). Slightly lower than control body weights were observe…	941ab3a4-3669-4e8c-8447-db206c89a25c	FALSE	{'code': '61011', 'code (mapped)': 'clinical signs'}	1130
229d77fb-d4cd-4ae7-8216-60b0ebbf43f5_dossier.i6z	NDA020838-candesartan cilexetil	145040-37-5	1-cyclohexyloxycarbonyloxyethyl 2-ethoxy-3-[[4-[2-(2H-tetrazol-5-yl)phenyl]phenyl]methyl]benzimidazole-4-carboxylate	v2	NDA020838	CARDIOVASCULAR SYSTEM	a5a28d5d-8005-401b-9e14-65a818f42c51	229d77fb-d4cd-4ae7-8216-60b0ebbf43f5	46161435	35ae3f90-b204-412a-9b06-1e0993d97cb0	Carcinogenicity	61277	carcinogenicity: oral	1895	experimental study				{"AdministrativeData": {"Endpoint": {"code": "61277"}, "StudyResultType": {"code": "1895"}, "RobustStudy": false, "UsedForClassification": false, "UsedForMSDS": false}, "MaterialsAndMethods": {"TestMaterials": {"TestMaterialInformation": "0260d68a-deaa-4ec5-ac20-3470b5c643a3/a5a28d5d-8005-401b-9e14-65a818f42c51", "SpecificDetailsOnTestMaterialUsedForTheStudy": "Lot #M464-010"}, "TestAnimals": {"S…	rat	other:F344/Jcl	oral: feed	13 weeks	not specified	1000.0 mg/kg bw/day (actual dose received), 300.0 mg/kg bw/day (actual dose received), None mg/kg bw/day (actual dose received), 3000.0 mg/kg bw/day (actual dose received)	Significantly lower than control body weights were observed for males treated with 1000 and 3000 mg candesartan cilexetil/kg/day from week 2 to week 13 of dosing (Fig. 12, Table 73). Slightly lower than control body weights were observed for females in the 3000 mg/kg dose group; however, the latter difference was not statistically significant. The gains from initial body weights to those at week …	Plasma urea nitrogen was increased in each treated group except for females in the 300 mg/kg/day group. Plasma LDH, AST and ALT values in females given 1000 and 3000 mg candesartan cilexetil/kg/day were higher than control (Table 77). In males, higher than control levels of inorganic phosphorus were noted in all candesartan cilexetil- treated groups, and higher than control levels of cholesterol …			A statistically significant reduction from control food consumption was observed for males in each treated group from week 1 through week 6; thereafter, statistically significant reductions were noted sporadically in the 1000 mg/kg group. No treatment- related effects on food consumption were noted for female rats (Table 74)._x000D_ _x000D_ _x000D_ _x000D_ Drug intake during week 1 was below the …			Lower than control values in erythrocyte counts, hemoglobin concentration and hematocrit were observed in females receiving 300 mg candesartan cilexetil/kg/day and in both sexes receiving 1000 and 3000 mg candesartan cilexetil/kg/day (Table 76).	Higher than control incidences of hypertrophy of the juxtaglomerular (JG) cells and intimal proliferation of the interlobular artery in the kidney were observed in candesartan cilexetil- treated groups (Table 79). The severity of JG cell hypertrophy seen with 300 mg candesartan cilexetil/kg/day in males (mild hypertrophy in 7/10 and moderate hypertrophy in 3/30) increased with higher doses (mild …			Lower than control heart weight and higher than control relative kidney weights were noted in each treated group for both sexes (Table 78).	Urine values (pH, protein, ketones, urobilinogen and incidence of occult blood, erythrocytes, leukocytes and epithelial cells) in treated animals were comparable to those of control.				Results_x000D_ Mortality and Clinical Signs: No animals died during the study. No treatment-related clinical signs of toxicity were observed. _x000D_ Body Weight: Significantly lower than control body weights were observed for males treated with 1000 and 3000 mg candesartan cilexetil/kg/day from week 2 to week 13 of dosing (Fig. 12, Table 73). Slightly lower than control body weights were observe…			Results_x000D_ Mortality and Clinical Signs: No animals died during the study. No treatment-related clinical signs of toxicity were observed. _x000D_ Body Weight: Significantly lower than control body weights were observed for males treated with 1000 and 3000 mg candesartan cilexetil/kg/day from week 2 to week 13 of dosing (Fig. 12, Table 73). Slightly lower than control body weights were observe…	948a8488-e4f9-41c0-954d-72638886e747	FALSE	{'code': '61019', 'code (mapped)': 'urinalysis'}	1130
229d77fb-d4cd-4ae7-8216-60b0ebbf43f5_dossier.i6z	NDA020838-candesartan cilexetil	145040-37-5	1-cyclohexyloxycarbonyloxyethyl 2-ethoxy-3-[[4-[2-(2H-tetrazol-5-yl)phenyl]phenyl]methyl]benzimidazole-4-carboxylate	v2	NDA020838	CARDIOVASCULAR SYSTEM	a5a28d5d-8005-401b-9e14-65a818f42c51	229d77fb-d4cd-4ae7-8216-60b0ebbf43f5	46161435	35ae3f90-b204-412a-9b06-1e0993d97cb0	Carcinogenicity	61277	carcinogenicity: oral	1895	experimental study				{"AdministrativeData": {"Endpoint": {"code": "61277"}, "StudyResultType": {"code": "1895"}, "RobustStudy": false, "UsedForClassification": false, "UsedForMSDS": false}, "MaterialsAndMethods": {"TestMaterials": {"TestMaterialInformation": "0260d68a-deaa-4ec5-ac20-3470b5c643a3/a5a28d5d-8005-401b-9e14-65a818f42c51", "SpecificDetailsOnTestMaterialUsedForTheStudy": "Lot #M464-010"}, "TestAnimals": {"S…	rat	other:F344/Jcl	oral: feed	13 weeks	not specified	1000.0 mg/kg bw/day (actual dose received), 300.0 mg/kg bw/day (actual dose received), None mg/kg bw/day (actual dose received), 3000.0 mg/kg bw/day (actual dose received)	Significantly lower than control body weights were observed for males treated with 1000 and 3000 mg candesartan cilexetil/kg/day from week 2 to week 13 of dosing (Fig. 12, Table 73). Slightly lower than control body weights were observed for females in the 3000 mg/kg dose group; however, the latter difference was not statistically significant. The gains from initial body weights to those at week …	Plasma urea nitrogen was increased in each treated group except for females in the 300 mg/kg/day group. Plasma LDH, AST and ALT values in females given 1000 and 3000 mg candesartan cilexetil/kg/day were higher than control (Table 77). In males, higher than control levels of inorganic phosphorus were noted in all candesartan cilexetil- treated groups, and higher than control levels of cholesterol …			A statistically significant reduction from control food consumption was observed for males in each treated group from week 1 through week 6; thereafter, statistically significant reductions were noted sporadically in the 1000 mg/kg group. No treatment- related effects on food consumption were noted for female rats (Table 74)._x000D_ _x000D_ _x000D_ _x000D_ Drug intake during week 1 was below the …			Lower than control values in erythrocyte counts, hemoglobin concentration and hematocrit were observed in females receiving 300 mg candesartan cilexetil/kg/day and in both sexes receiving 1000 and 3000 mg candesartan cilexetil/kg/day (Table 76).	Higher than control incidences of hypertrophy of the juxtaglomerular (JG) cells and intimal proliferation of the interlobular artery in the kidney were observed in candesartan cilexetil- treated groups (Table 79). The severity of JG cell hypertrophy seen with 300 mg candesartan cilexetil/kg/day in males (mild hypertrophy in 7/10 and moderate hypertrophy in 3/30) increased with higher doses (mild …			Lower than control heart weight and higher than control relative kidney weights were noted in each treated group for both sexes (Table 78).	Urine values (pH, protein, ketones, urobilinogen and incidence of occult blood, erythrocytes, leukocytes and epithelial cells) in treated animals were comparable to those of control.				Results_x000D_ Mortality and Clinical Signs: No animals died during the study. No treatment-related clinical signs of toxicity were observed. _x000D_ Body Weight: Significantly lower than control body weights were observed for males treated with 1000 and 3000 mg candesartan cilexetil/kg/day from week 2 to week 13 of dosing (Fig. 12, Table 73). Slightly lower than control body weights were observe…			Results_x000D_ Mortality and Clinical Signs: No animals died during the study. No treatment-related clinical signs of toxicity were observed. _x000D_ Body Weight: Significantly lower than control body weights were observed for males treated with 1000 and 3000 mg candesartan cilexetil/kg/day from week 2 to week 13 of dosing (Fig. 12, Table 73). Slightly lower than control body weights were observe…	a1071dc4-cfd9-47bf-89ec-9b899a3f6781	FALSE	{'code': '61017', 'code (mapped)': 'haematology'}	345
229d77fb-d4cd-4ae7-8216-60b0ebbf43f5_dossier.i6z	NDA020838-candesartan cilexetil	145040-37-5	1-cyclohexyloxycarbonyloxyethyl 2-ethoxy-3-[[4-[2-(2H-tetrazol-5-yl)phenyl]phenyl]methyl]benzimidazole-4-carboxylate	v2	NDA020838	CARDIOVASCULAR SYSTEM	a5a28d5d-8005-401b-9e14-65a818f42c51	229d77fb-d4cd-4ae7-8216-60b0ebbf43f5	46161435	35ae3f90-b204-412a-9b06-1e0993d97cb0	Carcinogenicity	61277	carcinogenicity: oral	1895	experimental study				{"AdministrativeData": {"Endpoint": {"code": "61277"}, "StudyResultType": {"code": "1895"}, "RobustStudy": false, "UsedForClassification": false, "UsedForMSDS": false}, "MaterialsAndMethods": {"TestMaterials": {"TestMaterialInformation": "0260d68a-deaa-4ec5-ac20-3470b5c643a3/a5a28d5d-8005-401b-9e14-65a818f42c51", "SpecificDetailsOnTestMaterialUsedForTheStudy": "Lot #M464-010"}, "TestAnimals": {"S…	rat	other:F344/Jcl	oral: feed	13 weeks	not specified	1000.0 mg/kg bw/day (actual dose received), 300.0 mg/kg bw/day (actual dose received), None mg/kg bw/day (actual dose received), 3000.0 mg/kg bw/day (actual dose received)	Significantly lower than control body weights were observed for males treated with 1000 and 3000 mg candesartan cilexetil/kg/day from week 2 to week 13 of dosing (Fig. 12, Table 73). Slightly lower than control body weights were observed for females in the 3000 mg/kg dose group; however, the latter difference was not statistically significant. The gains from initial body weights to those at week …	Plasma urea nitrogen was increased in each treated group except for females in the 300 mg/kg/day group. Plasma LDH, AST and ALT values in females given 1000 and 3000 mg candesartan cilexetil/kg/day were higher than control (Table 77). In males, higher than control levels of inorganic phosphorus were noted in all candesartan cilexetil- treated groups, and higher than control levels of cholesterol …			A statistically significant reduction from control food consumption was observed for males in each treated group from week 1 through week 6; thereafter, statistically significant reductions were noted sporadically in the 1000 mg/kg group. No treatment- related effects on food consumption were noted for female rats (Table 74)._x000D_ _x000D_ _x000D_ _x000D_ Drug intake during week 1 was below the …			Lower than control values in erythrocyte counts, hemoglobin concentration and hematocrit were observed in females receiving 300 mg candesartan cilexetil/kg/day and in both sexes receiving 1000 and 3000 mg candesartan cilexetil/kg/day (Table 76).	Higher than control incidences of hypertrophy of the juxtaglomerular (JG) cells and intimal proliferation of the interlobular artery in the kidney were observed in candesartan cilexetil- treated groups (Table 79). The severity of JG cell hypertrophy seen with 300 mg candesartan cilexetil/kg/day in males (mild hypertrophy in 7/10 and moderate hypertrophy in 3/30) increased with higher doses (mild …			Lower than control heart weight and higher than control relative kidney weights were noted in each treated group for both sexes (Table 78).	Urine values (pH, protein, ketones, urobilinogen and incidence of occult blood, erythrocytes, leukocytes and epithelial cells) in treated animals were comparable to those of control.				Results_x000D_ Mortality and Clinical Signs: No animals died during the study. No treatment-related clinical signs of toxicity were observed. _x000D_ Body Weight: Significantly lower than control body weights were observed for males treated with 1000 and 3000 mg candesartan cilexetil/kg/day from week 2 to week 13 of dosing (Fig. 12, Table 73). Slightly lower than control body weights were observe…			Results_x000D_ Mortality and Clinical Signs: No animals died during the study. No treatment-related clinical signs of toxicity were observed. _x000D_ Body Weight: Significantly lower than control body weights were observed for males treated with 1000 and 3000 mg candesartan cilexetil/kg/day from week 2 to week 13 of dosing (Fig. 12, Table 73). Slightly lower than control body weights were observe…	b1a292e2-678c-44e6-aaf4-1ab60282b265	FALSE	{'code': '61022', 'code (mapped)': 'organ weights and organ / body weight ratios'}	345
229d77fb-d4cd-4ae7-8216-60b0ebbf43f5_dossier.i6z	NDA020838-candesartan cilexetil	145040-37-5	1-cyclohexyloxycarbonyloxyethyl 2-ethoxy-3-[[4-[2-(2H-tetrazol-5-yl)phenyl]phenyl]methyl]benzimidazole-4-carboxylate	v2	NDA020838	CARDIOVASCULAR SYSTEM	a5a28d5d-8005-401b-9e14-65a818f42c51	229d77fb-d4cd-4ae7-8216-60b0ebbf43f5	46161435	35ae3f90-b204-412a-9b06-1e0993d97cb0	Carcinogenicity	61277	carcinogenicity: oral	1895	experimental study				{"AdministrativeData": {"Endpoint": {"code": "61277"}, "StudyResultType": {"code": "1895"}, "RobustStudy": false, "UsedForClassification": false, "UsedForMSDS": false}, "MaterialsAndMethods": {"TestMaterials": {"TestMaterialInformation": "0260d68a-deaa-4ec5-ac20-3470b5c643a3/a5a28d5d-8005-401b-9e14-65a818f42c51", "SpecificDetailsOnTestMaterialUsedForTheStudy": "Lot #M464-010"}, "TestAnimals": {"S…	rat	other:F344/Jcl	oral: feed	13 weeks	not specified	1000.0 mg/kg bw/day (actual dose received), 300.0 mg/kg bw/day (actual dose received), None mg/kg bw/day (actual dose received), 3000.0 mg/kg bw/day (actual dose received)	Significantly lower than control body weights were observed for males treated with 1000 and 3000 mg candesartan cilexetil/kg/day from week 2 to week 13 of dosing (Fig. 12, Table 73). Slightly lower than control body weights were observed for females in the 3000 mg/kg dose group; however, the latter difference was not statistically significant. The gains from initial body weights to those at week …	Plasma urea nitrogen was increased in each treated group except for females in the 300 mg/kg/day group. Plasma LDH, AST and ALT values in females given 1000 and 3000 mg candesartan cilexetil/kg/day were higher than control (Table 77). In males, higher than control levels of inorganic phosphorus were noted in all candesartan cilexetil- treated groups, and higher than control levels of cholesterol …			A statistically significant reduction from control food consumption was observed for males in each treated group from week 1 through week 6; thereafter, statistically significant reductions were noted sporadically in the 1000 mg/kg group. No treatment- related effects on food consumption were noted for female rats (Table 74)._x000D_ _x000D_ _x000D_ _x000D_ Drug intake during week 1 was below the …			Lower than control values in erythrocyte counts, hemoglobin concentration and hematocrit were observed in females receiving 300 mg candesartan cilexetil/kg/day and in both sexes receiving 1000 and 3000 mg candesartan cilexetil/kg/day (Table 76).	Higher than control incidences of hypertrophy of the juxtaglomerular (JG) cells and intimal proliferation of the interlobular artery in the kidney were observed in candesartan cilexetil- treated groups (Table 79). The severity of JG cell hypertrophy seen with 300 mg candesartan cilexetil/kg/day in males (mild hypertrophy in 7/10 and moderate hypertrophy in 3/30) increased with higher doses (mild …			Lower than control heart weight and higher than control relative kidney weights were noted in each treated group for both sexes (Table 78).	Urine values (pH, protein, ketones, urobilinogen and incidence of occult blood, erythrocytes, leukocytes and epithelial cells) in treated animals were comparable to those of control.				Results_x000D_ Mortality and Clinical Signs: No animals died during the study. No treatment-related clinical signs of toxicity were observed. _x000D_ Body Weight: Significantly lower than control body weights were observed for males treated with 1000 and 3000 mg candesartan cilexetil/kg/day from week 2 to week 13 of dosing (Fig. 12, Table 73). Slightly lower than control body weights were observe…			Results_x000D_ Mortality and Clinical Signs: No animals died during the study. No treatment-related clinical signs of toxicity were observed. _x000D_ Body Weight: Significantly lower than control body weights were observed for males treated with 1000 and 3000 mg candesartan cilexetil/kg/day from week 2 to week 13 of dosing (Fig. 12, Table 73). Slightly lower than control body weights were observe…	b1a292e2-678c-44e6-aaf4-1ab60282b265	FALSE	{'code': '61022', 'code (mapped)': 'organ weights and organ / body weight ratios'}	345
229d77fb-d4cd-4ae7-8216-60b0ebbf43f5_dossier.i6z	NDA020838-candesartan cilexetil	145040-37-5	1-cyclohexyloxycarbonyloxyethyl 2-ethoxy-3-[[4-[2-(2H-tetrazol-5-yl)phenyl]phenyl]methyl]benzimidazole-4-carboxylate	v2	NDA020838	CARDIOVASCULAR SYSTEM	a5a28d5d-8005-401b-9e14-65a818f42c51	229d77fb-d4cd-4ae7-8216-60b0ebbf43f5	46161435	35ae3f90-b204-412a-9b06-1e0993d97cb0	Carcinogenicity	61277	carcinogenicity: oral	1895	experimental study				{"AdministrativeData": {"Endpoint": {"code": "61277"}, "StudyResultType": {"code": "1895"}, "RobustStudy": false, "UsedForClassification": false, "UsedForMSDS": false}, "MaterialsAndMethods": {"TestMaterials": {"TestMaterialInformation": "0260d68a-deaa-4ec5-ac20-3470b5c643a3/a5a28d5d-8005-401b-9e14-65a818f42c51", "SpecificDetailsOnTestMaterialUsedForTheStudy": "Lot #M464-010"}, "TestAnimals": {"S…	rat	other:F344/Jcl	oral: feed	13 weeks	not specified	1000.0 mg/kg bw/day (actual dose received), 300.0 mg/kg bw/day (actual dose received), None mg/kg bw/day (actual dose received), 3000.0 mg/kg bw/day (actual dose received)	Significantly lower than control body weights were observed for males treated with 1000 and 3000 mg candesartan cilexetil/kg/day from week 2 to week 13 of dosing (Fig. 12, Table 73). Slightly lower than control body weights were observed for females in the 3000 mg/kg dose group; however, the latter difference was not statistically significant. The gains from initial body weights to those at week …	Plasma urea nitrogen was increased in each treated group except for females in the 300 mg/kg/day group. Plasma LDH, AST and ALT values in females given 1000 and 3000 mg candesartan cilexetil/kg/day were higher than control (Table 77). In males, higher than control levels of inorganic phosphorus were noted in all candesartan cilexetil- treated groups, and higher than control levels of cholesterol …			A statistically significant reduction from control food consumption was observed for males in each treated group from week 1 through week 6; thereafter, statistically significant reductions were noted sporadically in the 1000 mg/kg group. No treatment- related effects on food consumption were noted for female rats (Table 74)._x000D_ _x000D_ _x000D_ _x000D_ Drug intake during week 1 was below the …			Lower than control values in erythrocyte counts, hemoglobin concentration and hematocrit were observed in females receiving 300 mg candesartan cilexetil/kg/day and in both sexes receiving 1000 and 3000 mg candesartan cilexetil/kg/day (Table 76).	Higher than control incidences of hypertrophy of the juxtaglomerular (JG) cells and intimal proliferation of the interlobular artery in the kidney were observed in candesartan cilexetil- treated groups (Table 79). The severity of JG cell hypertrophy seen with 300 mg candesartan cilexetil/kg/day in males (mild hypertrophy in 7/10 and moderate hypertrophy in 3/30) increased with higher doses (mild …			Lower than control heart weight and higher than control relative kidney weights were noted in each treated group for both sexes (Table 78).	Urine values (pH, protein, ketones, urobilinogen and incidence of occult blood, erythrocytes, leukocytes and epithelial cells) in treated animals were comparable to those of control.				Results_x000D_ Mortality and Clinical Signs: No animals died during the study. No treatment-related clinical signs of toxicity were observed. _x000D_ Body Weight: Significantly lower than control body weights were observed for males treated with 1000 and 3000 mg candesartan cilexetil/kg/day from week 2 to week 13 of dosing (Fig. 12, Table 73). Slightly lower than control body weights were observe…			Results_x000D_ Mortality and Clinical Signs: No animals died during the study. No treatment-related clinical signs of toxicity were observed. _x000D_ Body Weight: Significantly lower than control body weights were observed for males treated with 1000 and 3000 mg candesartan cilexetil/kg/day from week 2 to week 13 of dosing (Fig. 12, Table 73). Slightly lower than control body weights were observe…	ca2b7cec-f6e0-48d0-962d-fbcc573f43ad	FALSE	{'code': '61025', 'code (mapped)': 'histopathology: non-neoplastic'}	345
229d77fb-d4cd-4ae7-8216-60b0ebbf43f5_dossier.i6z	NDA020838-candesartan cilexetil	145040-37-5	1-cyclohexyloxycarbonyloxyethyl 2-ethoxy-3-[[4-[2-(2H-tetrazol-5-yl)phenyl]phenyl]methyl]benzimidazole-4-carboxylate	v2	NDA020838	CARDIOVASCULAR SYSTEM	a5a28d5d-8005-401b-9e14-65a818f42c51	229d77fb-d4cd-4ae7-8216-60b0ebbf43f5	46161435	35ae3f90-b204-412a-9b06-1e0993d97cb0	Carcinogenicity	61277	carcinogenicity: oral	1895	experimental study				{"AdministrativeData": {"Endpoint": {"code": "61277"}, "StudyResultType": {"code": "1895"}, "RobustStudy": false, "UsedForClassification": false, "UsedForMSDS": false}, "MaterialsAndMethods": {"TestMaterials": {"TestMaterialInformation": "0260d68a-deaa-4ec5-ac20-3470b5c643a3/a5a28d5d-8005-401b-9e14-65a818f42c51", "SpecificDetailsOnTestMaterialUsedForTheStudy": "Lot #M464-010"}, "TestAnimals": {"S…	rat	other:F344/Jcl	oral: feed	13 weeks	not specified	1000.0 mg/kg bw/day (actual dose received), 300.0 mg/kg bw/day (actual dose received), None mg/kg bw/day (actual dose received), 3000.0 mg/kg bw/day (actual dose received)	Significantly lower than control body weights were observed for males treated with 1000 and 3000 mg candesartan cilexetil/kg/day from week 2 to week 13 of dosing (Fig. 12, Table 73). Slightly lower than control body weights were observed for females in the 3000 mg/kg dose group; however, the latter difference was not statistically significant. The gains from initial body weights to those at week …	Plasma urea nitrogen was increased in each treated group except for females in the 300 mg/kg/day group. Plasma LDH, AST and ALT values in females given 1000 and 3000 mg candesartan cilexetil/kg/day were higher than control (Table 77). In males, higher than control levels of inorganic phosphorus were noted in all candesartan cilexetil- treated groups, and higher than control levels of cholesterol …			A statistically significant reduction from control food consumption was observed for males in each treated group from week 1 through week 6; thereafter, statistically significant reductions were noted sporadically in the 1000 mg/kg group. No treatment- related effects on food consumption were noted for female rats (Table 74)._x000D_ _x000D_ _x000D_ _x000D_ Drug intake during week 1 was below the …			Lower than control values in erythrocyte counts, hemoglobin concentration and hematocrit were observed in females receiving 300 mg candesartan cilexetil/kg/day and in both sexes receiving 1000 and 3000 mg candesartan cilexetil/kg/day (Table 76).	Higher than control incidences of hypertrophy of the juxtaglomerular (JG) cells and intimal proliferation of the interlobular artery in the kidney were observed in candesartan cilexetil- treated groups (Table 79). The severity of JG cell hypertrophy seen with 300 mg candesartan cilexetil/kg/day in males (mild hypertrophy in 7/10 and moderate hypertrophy in 3/30) increased with higher doses (mild …			Lower than control heart weight and higher than control relative kidney weights were noted in each treated group for both sexes (Table 78).	Urine values (pH, protein, ketones, urobilinogen and incidence of occult blood, erythrocytes, leukocytes and epithelial cells) in treated animals were comparable to those of control.				Results_x000D_ Mortality and Clinical Signs: No animals died during the study. No treatment-related clinical signs of toxicity were observed. _x000D_ Body Weight: Significantly lower than control body weights were observed for males treated with 1000 and 3000 mg candesartan cilexetil/kg/day from week 2 to week 13 of dosing (Fig. 12, Table 73). Slightly lower than control body weights were observe…			Results_x000D_ Mortality and Clinical Signs: No animals died during the study. No treatment-related clinical signs of toxicity were observed. _x000D_ Body Weight: Significantly lower than control body weights were observed for males treated with 1000 and 3000 mg candesartan cilexetil/kg/day from week 2 to week 13 of dosing (Fig. 12, Table 73). Slightly lower than control body weights were observe…	df91a520-84c7-40e4-a5d9-6cb68c8560b8	FALSE	{'code': '61018', 'code (mapped)': 'clinical biochemistry'}	345
[truncated: 12,787 more rows]
[truncated: 18 more columns]
